# Supplementary material for: Full-color emission of fluorinated benzothiadiazole-based D–A–D fluorophores and their bioimaging applications
Source: Royal Society of Chemistry journal article supplement (doi:10.1039/d3ma00876b), 2023-01-01
Supplement: d3ma00876b1.pdf [file d3ma00876b1.pdf]

# Electronic Supplementary Information

## Full-color Emission of Fluorinated Benzothiadiazole-based D-A-D Fluorophores and Bioimaging Application

*Si-Hong Chen<sup>a</sup>, Xi-Ying Cao<sup>a</sup>, Peng-Tao Hu<sup>a</sup>, Kai Jiang<sup>b,\*</sup>, Yong-Tong Liang<sup>a</sup>, Bing-Jia Xu<sup>a,\*</sup>,  
Zhong-Hao Li<sup>a</sup>, and Zhao-Yang Wang<sup>a,b,\*</sup>*

<sup>a</sup> *School of Chemistry, South China Normal University; Key Laboratory of Theoretical Chemistry of Environment,  
Ministry of Education; Guangzhou Key Laboratory of Analytical Chemistry for Biomedicine; GDMPA Key  
Laboratory for Process Control and Quality Evaluation of Chiral Pharmaceuticals, Guangzhou 510006, China*

<sup>b</sup> *Key Laboratory of Functional Molecular Engineering of Guangdong Province, South China University of Technology,  
Guangzhou 510640, China*

*E-mail: wangzy@scnu.edu.cn; Fax: (+86) 20-39310187; Tel.: (+86) 20-39310258*

*E-mail: 201910104301@mail.scut.edu.cn*

*E-mail: bingjiaxu@m.scnu.edu.cn*

## Contents

|                                                                                                                                 |     |
|---------------------------------------------------------------------------------------------------------------------------------|-----|
| 1. Chemicals and apparatus .....                                                                                                | 3   |
| 2. Synthesis and characterization ( <b>Schemes S1-S3</b> ) .....                                                                | 4   |
| 3. Analytical methods .....                                                                                                     | 10  |
| 4. <sup>1</sup> H, <sup>13</sup> C, <sup>19</sup> F NMR and HRMS spectra of synthesized compounds ( <b>Figs. S1-S62</b> ) ..... | 11  |
| 5. Single crystal data of compounds <b>3e</b> , <b>3f</b> , <b>3m</b> and <b>3p</b> ( <b>Tables S1-S4, Fig. S63</b> ) .....     | 42  |
| 6. Thermogravimetric analyses of compounds <b>3a-3p</b> ( <b>Fig. S64</b> ) .....                                               | 46  |
| 7. Fluorescent lifetime of compounds <b>3a-3p</b> ( <b>Table S5</b> ) .....                                                     | 47  |
| 8. Fluorescence spectra of compounds <b>3a-3p</b> in different states ( <b>Figs. S65-S67</b> ) .....                            | 48  |
| 9. Fluorescence spectra of compounds <b>3a-3p</b> in various solvents ( <b>Figs. S68-S75, Tables S6 and S7</b> ) ..             | 50  |
| 10. Fluorescent behaviors of <b>3a-3p</b> in solution and aggregation states ( <b>Figs. S76-S91</b> ) .....                     | 55  |
| 11. AIE behavior of compounds <b>3k</b> and <b>3m</b> ( <b>Figs. S92-S94</b> ) .....                                            | 63  |
| 12. Photostability of compounds <b>3a-3p</b> ( <b>Fig. S95</b> ) .....                                                          | 65  |
| 13. Computational results of compounds <b>3a-3p</b> ( <b>Tables S8-S23</b> ) .....                                              | 66  |
| 14. Supplementary material reference .....                                                                                      | 104 |

## 1. Chemicals and apparatus

The melting point (m.p.) was determined using INESA WRS-1B digital melting point apparatus without correction. The  $^1\text{H}$ ,  $^{13}\text{C}$  and  $^{19}\text{F}$  NMR spectra were measured with a Bruker DRX-600 spectrometer using TMS as an internal standard. High-resolution mass spectra (HRMS) were obtained with a LCMS-IT-TOF mass spectrometer. Single crystal X-ray analysis was obtained using Bruker APEX2 Smart CCD.

Thermogravimetric analyses (TGA) were measured by a PerkinElmer TGA-8000 thermogravimetric analyzer at a heating rate of 10 °C/min from 50 °C to 800 °C under an air atmosphere. The UV-*vis* spectra were measured by using a Shimadzu UV-2700 ultraviolet absorption detector at room temperature. The fluorescence spectra were recorded with a Hitachi F-4600 spectrophotometer. Absolute PL quantum yields ( $\Phi_{\text{F}}$ ) were measured by Edinburgh FLS 980 fluorescence spectrometer with a calibrated integrating sphere. The fluorescence lifetime was measured by using an Edinburgh FLS 980 fluorescence spectrometer. The dynamic light scattering (DLS) experiments were performed on a Malvern Zetasizer Nano ZS90. Cell viability was tested by a Thermo Multiskan MK3 microplate reader. Fluorescence imaging of cells was obtained by Leica TCS SP8 confocal laser scanning microscope.

Reactions were monitored by using thin-layer chromatography (TLC) and visualized with UV light at 254 or 365 nm. All reagents and solvents were purchased from commercial sources (Energy Chemical or Guangzhou chemical reagent factory) and used without further purification, and all chemicals used in this work were of analytical grade purity and used as received. For the real water samples, tap water was collected from the laboratory.

## 2. Synthesis and characterization

### 2.1. Synthesis of compounds 3a-3n

As **Scheme S1**, compounds **3a-3n** were synthesized by a modification of the literature procedure.<sup>1</sup> A Schlenk tube with a magnetic stir bar was charged with compound **1** (0.2 mmol, 0.0659 g), CuI (0.02 mmol, 0.0038 g), Pd(PPh<sub>3</sub>)<sub>2</sub>Cl<sub>2</sub> (0.02 mmol, 0.0140 g), PPh<sub>3</sub> (0.02 mmol, 0.0052 g), and trimethylsilyl acetylene (0.42 mmol, 0.0413 g) in the mixture of 2 mL dry triethylamine and 2 mL dry THF. Then, the mixed reactants were stirred at 110 °C for 24 h under N<sub>2</sub> atmosphere. After the reaction was complete, the obtained mixture was cooled to room temperature and quenched by using the saturated NH<sub>4</sub>Cl aqueous solution, and then was extracted with dichloromethane (3×15 mL). The organic solvent was evaporated by decompression. The residue was subjected to silica gel column chromatography with the mixture of petroleum ether (PE) and dichloromethane (DCM) as the ration of PE/DCM = 8/1 to afford pure compound **3a**.

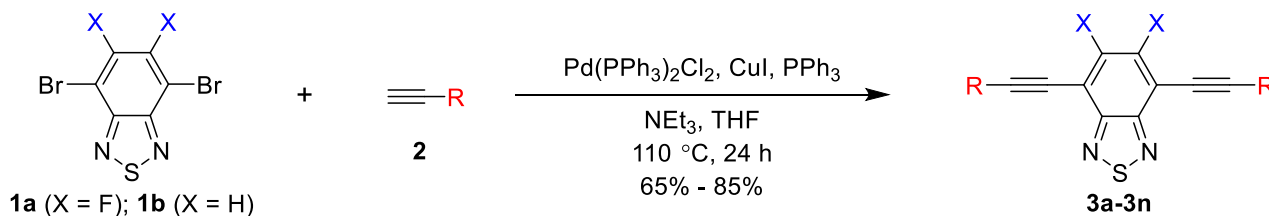

**Scheme S1.** Synthesis of compounds **3a-3n**.

Similarly, other compounds **3b-3n** were synthesized in the same way. Among them, for the compounds **3b-3e** and **3g-3j**, the eluent was a mixture of PE/DCM (1/6). For the compounds **3f** and **3k**, the eluent was a mixture of PE/DCM (1/4). For the compounds **3l-3n**, the eluent was a mixture of PE/DCM (1/3).

All target compounds were well characterized (**3b-3m** were first reported).

**5,6-Difluoro-4,7-bis(trimethylsilylethynyl)benzo[*c*][1,2,5]thiadiazole (3a)**, white solid (0.0513 g), 70 % yield (71 %<sup>2</sup> or 93%<sup>3</sup> yield); m.p. = 105.8 - 107.1 °C; <sup>1</sup>H NMR (CDCl<sub>3</sub>, 600 MHz): δ = 0.35 (s, 18H) ppm; <sup>13</sup>C NMR (CDCl<sub>3</sub>, 150 MHz): δ = 0.2, 92.6, 104.6 (dd, *J*<sub>1</sub> = 13.1 Hz, *J*<sub>2</sub> = 5.1 Hz), 111.6, 150.7 (dd, *J*<sub>1</sub> = 3.3 Hz, *J*<sub>2</sub> = 2.3 Hz), 155.6 (dd, *J*<sub>1</sub> = 263.6 Hz, *J*<sub>2</sub> = 19.4 Hz) ppm; <sup>19</sup>F NMR (CDCl<sub>3</sub>, 564 MHz): δ = -123.7 ppm; HRMS, *m/z* (%): Calcd for C<sub>16</sub>H<sub>19</sub>F<sub>2</sub>N<sub>2</sub>SSi<sub>2</sub><sup>+</sup> ([M+H]<sup>+</sup>): 365.0770 (100), Found: 365.0776 (100).

**5,6-Difluoro-4,7-di(hex-1-yn-1-yl)benzo[*c*][1,2,5]thiadiazole (3b)**, white solid (0.0492 g), 74 % yield; m.p. = 89.2 - 90.3 °C; <sup>1</sup>H NMR (CDCl<sub>3</sub>, 600 MHz): δ = 0.98 (t, *J* = 7.2 Hz, 6H), 1.52-1.59 (m, 4H), 1.68-1.73 (m, 4H), 2.64 (t, *J* = 7.2 Hz, 4H) ppm; <sup>13</sup>C NMR (CDCl<sub>3</sub>, 150 MHz): δ = 13.6, 19.9, 22.0, 30.4, 69.6, 104.0 (dd, *J*<sub>1</sub> = 13.4 Hz, *J*<sub>2</sub> = 4.8 Hz), 105.6, 150.7 (dd, *J*<sub>1</sub> = 3.6 Hz, *J*<sub>2</sub> = 2.4 Hz), 154.8 (dd, *J*<sub>1</sub> = 260.4 Hz, *J*<sub>2</sub> = 19.4 Hz) ppm; <sup>19</sup>F NMR (CDCl<sub>3</sub>, 564 MHz): δ = -125.8 ppm; HRMS, *m/z* (%): Calcd for C<sub>18</sub>H<sub>19</sub>F<sub>2</sub>N<sub>2</sub>S<sup>+</sup> ([M+H]<sup>+</sup>): 333.1232 (100), Found: 333.1226 (100).

**5,6-Difluoro-4,7-bis(thiophen-2-ylethynyl)benzo[*c*][1,2,5]thiadiazole (3c)**, orange solid (0.0502 g), 65 % yield; m.p. > 300.0 °C (carbonization, decomposition temperature is lower than melting point); <sup>1</sup>H NMR (CDCl<sub>3</sub>, 600 MHz): δ = 7.09-7.10 (m, 2H), 7.45 (d, *J* = 6.0 Hz, 2H), 7.51 (d, *J* = 4.2 Hz, 2H) ppm; <sup>13</sup>C NMR (CDCl<sub>3</sub>, 150 MHz): δ = 82.0, 96.8, 103.9 (dd, *J*<sub>1</sub> = 13.2 Hz, *J*<sub>2</sub> = 5.9 Hz), 121.7, 127.5, 129.6, 134.1, 150.1 (dd, *J*<sub>1</sub> = 4.8 Hz, *J*<sub>2</sub> = 2.4 Hz), 154.0 (dd, *J*<sub>1</sub> = 262.4 Hz, *J*<sub>2</sub> = 19.8 Hz) ppm; <sup>19</sup>F NMR (CDCl<sub>3</sub>, 564 MHz): δ = -124.2 ppm; HRMS, *m/z* (%): Calcd for C<sub>18</sub>H<sub>7</sub>F<sub>2</sub>N<sub>2</sub>S<sub>3</sub><sup>+</sup> ([M+H]<sup>+</sup>): 384.9734 (100), Found: 394.9727 (100).

**5,6-Difluoro-4,7-bis(phenylethynyl)benzo[*c*][1,2,5]thiadiazole (3d)**, yellow solid (0.0567 g), 76 % yield; m.p. = 202.4 - 203.8 °C; <sup>1</sup>H NMR (CDCl<sub>3</sub>, 600 MHz): δ = 7.38-7.43 (m, 6H), 7.66-7.69 (m, 4H) ppm; <sup>13</sup>C NMR (CDCl<sub>3</sub>, 150 MHz): δ = 78.1, 103.5, 104.1 (dd, *J*<sub>1</sub> = 13.1 Hz, *J*<sub>2</sub> = 5.1 Hz), 121.9, 128.5, 129.7, 132.1, 150.3 (dd, *J*<sub>1</sub> = 3.0 Hz, *J*<sub>2</sub> = 2.4 Hz), 154.3 (dd, *J*<sub>1</sub> = 262.5 Hz, *J*<sub>2</sub> = 18.9 Hz) ppm; <sup>19</sup>F NMR (CDCl<sub>3</sub>, 564 MHz): δ = -124.4 ppm; HRMS, *m/z* (%): Calcd for C<sub>22</sub>H<sub>11</sub>F<sub>2</sub>N<sub>2</sub>S<sup>+</sup> ([M+H]<sup>+</sup>): 373.0606 (100), Found: 373.0601 (100).

**5,6-Difluoro-4,7-bis(*p*-tolylethynyl)benzo[*c*][1,2,5]thiadiazole (3e)**, yellow solid (0.0630 g), 79 % yield; m.p. = 228.3 - 229.8 °C; <sup>1</sup>H NMR (CDCl<sub>3</sub>, 600 MHz): δ = 2.41 (s, 6H), 7.22 (d, *J* = 7.8 Hz, 4H), 7.59 (d, *J* = 8.4 Hz, 4H) ppm; <sup>13</sup>C NMR (CDCl<sub>3</sub>, 150 MHz): δ = 21.7, 77.7, 103.8, 104.1 (dd, *J*<sub>1</sub> = 13.4 Hz, *J*<sub>2</sub> = 5.3 Hz), 118.9, 129.3, 132.1, 140.1, 150.4 (dd, *J*<sub>1</sub> = 3.5 Hz, *J*<sub>2</sub> = 3.2 Hz), 154.4 (dd, *J*<sub>1</sub> =

262.2 Hz,  $J_2 = 19.4$  Hz) ppm;  $^{19}\text{F}$  NMR ( $\text{CDCl}_3$ , 564 MHz):  $\delta = -124.8$  ppm; HRMS,  $m/z$  (%): Calcd for  $\text{C}_{24}\text{H}_{14}\text{F}_2\text{N}_2\text{S}^-$  ( $[\text{M}+\text{H}]^+$ ): 400.0851 (100), Found: 400.5853 (100).

**5,6-Difluoro-4,7-bis(4-methoxyphenylethynyl)benzo[*c*][1,2,5]thiadiazole (3f)**, yellow solid (0.0685 g), 79 % yield; m.p. = 224.7 - 226.5 °C;  $^1\text{H}$  NMR ( $\text{CDCl}_3$ , 600 MHz):  $\delta = 3.86$  (s, 6H), 6.94 (d,  $J = 8.4$  Hz, 4H), 7.64 (d,  $J = 9.0$  Hz, 4H) ppm;  $^{13}\text{C}$  NMR ( $\text{CDCl}_3$ , 150 MHz):  $\delta = 55.4$ , 103.8, 104.1 (dd,  $J_1 = 12.9$  Hz,  $J_2 = 4.8$  Hz), 114.0, 114.2, 133.8, 150.4 (dd,  $J_1 = 3.3$  Hz,  $J_2 = 2.4$  Hz), 154.1 (dd,  $J_1 = 261.3$  Hz,  $J_2 = 19.2$  Hz), 160.8, ppm;  $^{19}\text{F}$  NMR ( $\text{CDCl}_3$ , 564 MHz):  $\delta = -125.2$  ppm; HRMS,  $m/z$  (%): Calcd for  $\text{C}_{24}\text{H}_{15}\text{F}_2\text{N}_2\text{O}_2\text{S}^+$  ( $[\text{M}+\text{H}]^+$ ): 433.0817 (100), Found: 443.0809 (100).

**4,7-Bis(4-chlorophenylethynyl)-5,6-difluorobenzo[*c*][1,2,5]thiadiazole (3g)**, yellow solid (0.0645 g), 73 % yield; m.p. = 225.3 - 226.3 °C;  $^1\text{H}$  NMR ( $\text{CDCl}_3$ , 600 MHz):  $\delta = 7.40$  (d,  $J = 9.0$  Hz, 4H), 7.63 (d,  $J = 8.4$  Hz, 4H) ppm;  $^{13}\text{C}$  NMR ( $\text{CDCl}_3$ , 150 MHz):  $\delta = 79.0$ , 102.3, 104.0 (dd,  $J_1 = 12.5$  Hz,  $J_2 = 5.6$  Hz), 120.3, 129.0, 133.4, 136.0, 152.2 (dd,  $J_1 = 3.0$  Hz,  $J_2 = 2.4$  Hz), 154.4 (dd,  $J_1 = 262.5$  Hz,  $J_2 = 19.5$  Hz), ppm;  $^{19}\text{F}$  NMR ( $\text{CDCl}_3$ , 564 MHz):  $\delta = -124.0$  ppm; HRMS,  $m/z$  (%): Calcd for  $\text{C}_{22}\text{H}_8\text{Cl}_2\text{F}_2\text{N}_2\text{S}^-$ : 439.9759 (100), 441.9729 (64%), Found: 439.9763 (100), 441.9731 (64%).

**5,6-Difluoro-4,7-bis(naphthalen-1-ylethynyl)benzo[*c*][1,2,5]thiadiazole (3h)**, yellow solid (0.0686 g), 73 % yield; m.p. = 197.1 - 198.6 °C;  $^1\text{H}$  NMR ( $\text{CDCl}_3$ , 600 MHz):  $\delta = 7.53$ -7.55 (m, 2H), 7.59-7.62 (m, 2H), 7.70-7.73 (m, 2H), 7.92 (d,  $J = 8.4$  Hz, 2H), 7.96 (d,  $J = 7.8$  Hz, 2H), 7.97 (d,  $J = 7.8$  Hz, 2H), 8.67 (d,  $J = 8.4$  Hz, 2H) ppm;  $^{13}\text{C}$  NMR ( $\text{CDCl}_3$ , 150 MHz):  $\delta = 78.8$ , 106.6 (dd,  $J_1 = 18.6$  Hz,  $J_2 = 5.4$  Hz), 109.5, 125.3, 126.2, 126.8, 127.6, 128.5, 130.4, 131.5, 133.2, 133.3, 143.3 (dd,  $J_1 = 4.2$  Hz,  $J_2 = 3.5$  Hz), 153.0 (dd,  $J_1 = 260.1$  Hz,  $J_2 = 20.6$  Hz) ppm;  $^{19}\text{F}$  NMR ( $\text{CDCl}_3$ , 564 MHz):  $\delta = -124.5$  ppm; HRMS,  $m/z$  (%): Calcd for  $\text{C}_{30}\text{H}_{15}\text{F}_2\text{N}_2\text{S}^+$  ( $[\text{M}+\text{H}]^+$ ): 473.0919 (100), Found: 473.0912 (100).

**4,7-Bis([1,1'-biphenyl]-4-ylethynyl)-5,6-difluorobenzo[*c*][1,2,5]thiadiazole (3i)**, yellow solid (0.0794 g), 76 % yield; m.p. = 254.2 - 255.8 °C;  $^1\text{H}$  NMR ( $\text{CDCl}_3$ , 600 MHz):  $\delta = 7.38$ -7.41 (m, 2H), 7.47-7.49 (m, 4H), 7.64 (d,  $J = 7.8$  Hz, 4H), 7.67 (d,  $J = 8.4$  Hz, 4H), 7.78 (d,  $J = 8.4$  Hz, 4H) ppm;  $^{13}\text{C}$  NMR ( $\text{CDCl}_3$ , 150 MHz):  $\delta = 78.9$ , 103.6, 103.9 (dd,  $J_1 = 17.1$  Hz,  $J_2 = 5.6$  Hz), 120.7, 127.1, 127.2, 128.0, 129.0, 132.7, 140.1, 142.5, 150.4 (dd,  $J_1 = 3.9$  Hz,  $J_2 = 2.7$  Hz), 156.2 (dd,  $J_1 = 254.6$  Hz,  $J_2 = 19.5$  Hz) ppm;  $^{19}\text{F}$  NMR ( $\text{CDCl}_3$ , 564 MHz):  $\delta = -124.4$  ppm; HRMS,  $m/z$  (%): Calcd for  $\text{C}_{34}\text{H}_{19}\text{F}_2\text{N}_2\text{S}^+$  ( $[\text{M}+\text{H}]^+$ ): 525.1232 (100), Found: 525.1222 (100).

**4,7-Bis(4-(9H-carbazol-9-yl)phenylethynyl)-5,6-difluorobenzo[*c*][1,2,5]thiadiazole (3j)**, yellow

solid (0.1159 g), 82 % yield; m.p. > 300.0 °C; <sup>1</sup>H NMR (CDCl<sub>3</sub>, 600 MHz): δ = 7.32-7.34 (m, 4H), 7.44 (d, *J* = 8.4 Hz, 4H), 7.46-7.50 (m, 4H), 7.68 (d, *J* = 8.4 Hz, 4H), 7.96 (d, *J* = 8.4 Hz, 4H), 8.16 (d, *J* = 7.8 Hz, 4H) ppm; <sup>13</sup>C NMR (CDCl<sub>3</sub>, 150 MHz): δ = 79.0, 102.9, 103.2 (dd, *J*<sub>1</sub> = 17.8 Hz, *J*<sub>2</sub> = 4.2 Hz), 109.8, 120.5, 120.6, 123.8, 126.2, 126.9, 133.8, 139.0, 140.4, 150.8 (dd, *J*<sub>1</sub> = 4.4 Hz, *J*<sub>2</sub> = 4.2 Hz), 155.6 (dd, *J*<sub>1</sub> = 273.5 Hz, *J*<sub>2</sub> = 20.7 Hz) ppm; <sup>19</sup>F NMR (CDCl<sub>3</sub>, 564 MHz): δ = -124.0 ppm; HRMS, *m/z* (%): Calcd for C<sub>46</sub>H<sub>25</sub>F<sub>2</sub>N<sub>4</sub>S<sup>+</sup> ([M+H]<sup>+</sup>): 703.1763 (100), Found: 703.1759 (100).

**4,4'-((5,6-Difluorobenzo[*c*][1,2,5]thiadiazole-4,7-diyl)bis(ethyne-2,1-diyl))bis(*N,N*-diphenylamine) (3k)**, red solid (0.1139 g), 81 % yield; m.p. = 255.2 - 256.1 °C; <sup>1</sup>H NMR (CDCl<sub>3</sub>, 600 MHz): δ = 7.02 (d, *J* = 8.4 Hz, 4H), 7.08-7.11 (m, 4H), 7.14 (d, *J* = 7.2 Hz, 8H), 7.28-7.31 (m, 8H), 7.50 (d, *J* = 9.0 Hz, 4H) ppm; <sup>13</sup>C NMR (CDCl<sub>3</sub>, 150 MHz): δ = 77.9, 103.9 (dd, *J*<sub>1</sub> = 13.1 Hz, *J*<sub>2</sub> = 4.7 Hz), 104.3, 124.1, 121.5, 124.1, 125.4, 129.5, 133.2, 146.9, 149.1, 150.4 (dd, *J*<sub>1</sub> = 3.2 Hz, *J*<sub>2</sub> = 2.4 Hz), 154.0 (dd, *J*<sub>1</sub> = 261.2 Hz, *J*<sub>2</sub> = 19.4 Hz) ppm; <sup>19</sup>F NMR (CDCl<sub>3</sub>, 564 MHz): δ = -126.0 ppm; HRMS, *m/z* (%): Calcd for C<sub>46</sub>H<sub>29</sub>F<sub>2</sub>N<sub>4</sub>S<sup>+</sup> ([M+H]<sup>+</sup>): 707.2076 (100), Found: 707.2072 (100).

**4,4'-((5,6-Difluorobenzo[*c*][1,2,5]thiadiazole-4,7-diyl)bis(ethyne-2,1-diyl))bis(*N,N*-bis(4-methoxyphenyl)aniline) (3l)**, dark red solid (0.1354 g), 82 % yield; m.p. = 197.9 - 199.6 °C; <sup>1</sup>H NMR (CDCl<sub>3</sub>, 600 MHz): δ = 3.81 (s, 12H), 6.86 (d, *J* = 9.0 Hz, 4H), 6.87 (d, *J* = 9.0 Hz, 8H), 7.10 (d, *J* = 9.0 Hz, 8H), 7.45 (d, *J* = 9.0 Hz, 4H) ppm; <sup>13</sup>C NMR (CDCl<sub>3</sub>, 150 MHz): δ = 55.5, 77.6, 103.9 (dd, *J*<sub>1</sub> = 13.1 Hz, *J*<sub>2</sub> = 5.4 Hz), 104.8, 112.1, 114.9, 118.5, 127.4, 133.1, 139.8, 149.9, 150.4 (dd, *J*<sub>1</sub> = 3.3 Hz, *J*<sub>2</sub> = 3.3 Hz), 153.9 (dd, *J*<sub>1</sub> = 260.4 Hz, *J*<sub>2</sub> = 19.5 Hz), 156.7 ppm; <sup>19</sup>F NMR (CDCl<sub>3</sub>, 564 MHz): δ = -125.9 ppm; HRMS, *m/z* (%): Calcd for C<sub>50</sub>H<sub>37</sub>F<sub>2</sub>N<sub>4</sub>O<sub>4</sub>S<sup>+</sup> ([M+H]<sup>+</sup>): 827.2498 (100), Found: 827.2494 (100).

**4,4'-((5,6-Difluorobenzo[*c*][1,2,5]thiadiazole-4,7-diyl)bis(ethyne-2,1-diyl))bis(*N,N*-dimethylaniline) (3m)**, red solid (0.0780 g), 85 % yield; m.p. > 300.0 °C (carbonization); <sup>1</sup>H NMR (CDCl<sub>3</sub>, 600 MHz): δ = 3.05 (s, 12H), 7.02 (d, *J* = 9.0 Hz, 4H), 7.50 (d, *J* = 7.8 Hz, 4H) ppm; <sup>13</sup>C NMR (CDCl<sub>3</sub>, 150 MHz): δ = 40.1, 105.5, 103.9 (dd, *J*<sub>1</sub> = 19.5 Hz, *J*<sub>2</sub> = 5.6 Hz), 108.5, 111.7, 128.3, 133.5, 150.5 (dd, *J*<sub>1</sub> = 3.2 Hz, *J*<sub>2</sub> = 2.4 Hz), 150.9, 153.5 (dd, *J*<sub>1</sub> = 259.5 Hz, *J*<sub>2</sub> = 19.4 Hz) ppm; <sup>19</sup>F NMR (CDCl<sub>3</sub>, 564 MHz): δ = -126.3 ppm; HRMS, *m/z* (%): Calcd for C<sub>26</sub>H<sub>21</sub>F<sub>2</sub>N<sub>4</sub>S<sup>+</sup> ([M+H]<sup>+</sup>): 459.1450 (100), Found: 459.1440 (100).

**4,4'-(Benzo[*c*][1,2,5]thiadiazole-4,7-diyl)bis(ethyne-2,1-diyl)bis(*N,N*-dimethylaniline) (3n)**, dark red solid (0.0657 g), 78 % yield (45 % yield<sup>4</sup>); m.p. > 300 °C (carbonization); <sup>1</sup>H NMR (CDCl<sub>3</sub>,

600 MHz):  $\delta = 3.02$  (s, 12H), 6.69 (d,  $J = 9.0$  Hz, 4H), 7.54 (d,  $J = 9.0$  Hz, 4H), 7.70 (s, 2H) ppm;  $^{13}\text{C}$  NMR ( $\text{CDCl}_3$ , 150 MHz):  $\delta = 40.2, 84.2, 99.2, 109.2, 111.7, 117.0, 131.7, 133.3, 150.5, 154.5$  ppm; HRMS,  $m/z$  (%): Calcd for  $\text{C}_{26}\text{H}_{23}\text{N}_4\text{S}^+$  ( $[\text{M}+\text{H}]^+$ ): 423.1638 (100), Found: 423.1632 (100).

## 2.2. Synthesis of compound 3o

As **Scheme S2**, compound **3o** was synthesized by a modification of the literature procedure.<sup>5</sup> A Schlenk tube with a magnetic stir bar was charged with compound **1'** (0.2 mmol, 0.0776 g),  $\text{Ag}_2\text{O}$  (0.6 mmol, 0.1361 g),  $\text{CsF}$  (0.6 mmol, 0.0911 g),  $\text{PdCl}_2(\text{dppf})$  (0.01 mmol, 0.0072 g), and compound **2'** (0.6 mmol, 0.1615 g) in 3 mL toluene. Then, the mixture was stirred for 24 h at 110 °C. After the reaction was complete, the obtained mixture was cooled to room temperature and extracted with dichloromethane (3×15 mL). The organic solvent was evaporated by decompression. Finally, the residue was subjected to silica gel column chromatography (PE/DCM = 6/1) to afford pure compound **3o**.

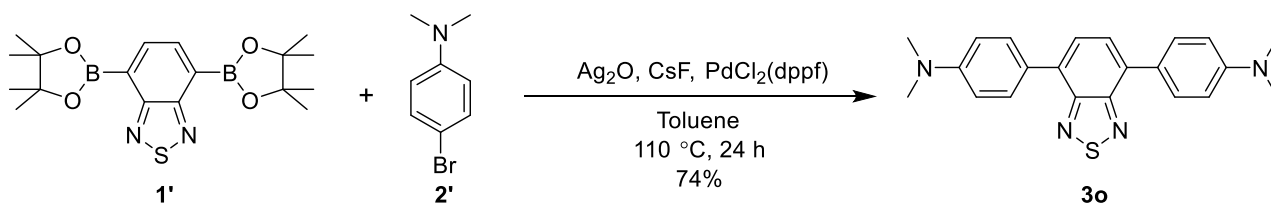

**Scheme S2.** Synthesis of compound **3o**.

**4,4'-(Benzo[*c*][1,2,5]thiadiazole-4,7-diyl)bis(*N,N*-dimethylaniline) (3o)**, red solid (0.0554 g), 74 % yield (85 % yield<sup>6</sup>); m.p. = 209.6 - 211.4 °C;  $^1\text{H}$  NMR ( $\text{CDCl}_3$ , 600 MHz):  $\delta = 3.04$  (s, 12H), 6.89 (d,  $J = 8.4$  Hz, 4H), 7.68 (s, 2H), 7.91 (d,  $J = 8.4$  Hz, 4H) ppm;  $^{13}\text{C}$  NMR ( $\text{CDCl}_3$ , 150 MHz):  $\delta = 40.5, 112.4, 125.7, 126.6, 129.9, 132.0, 154.4, 154.5$  ppm; HRMS,  $m/z$  (%): Calcd for  $\text{C}_{22}\text{H}_{23}\text{N}_4\text{S}^+$  ( $[\text{M}+\text{H}]^+$ ): 375.1638 (100), Found: 375.1641 (100).

## 2.3. Synthesis of compound 3p

As **Scheme S3**, compound **3p** was synthesized by a modification of the literature procedure.<sup>1</sup> A Schlenk tube with a magnetic stir bar was charged with compound **1** (0.2 mmol, 0.0659 g),  $\text{CuI}$  (0.02



mmol, 0.0038 g), Pd(PPh<sub>3</sub>)<sub>2</sub>Cl<sub>2</sub> (0.02 mmol, 0.0140 g), PPh<sub>3</sub> (0.02 mmol, 0.0052 g), and trimethylsilyl acetylene (0.22 mmol, 0.0206 g) in the mixture of 2 mL dry triethylamine and 2 mL dry THF. Then, the mixed reactants were stirred at 110 °C for 24 h under N<sub>2</sub> atmosphere. After the reaction was complete, the obtained mixture was cooled to room temperature and quenched by using the saturated NH<sub>4</sub>Cl aqueous solution, and then was extracted with dichloromethane (3×15 mL). The organic solvent was evaporated by decompression. The residue was subjected to silica gel column chromatography (PE/DCM = 6/1) to afford pure compound **3p**.

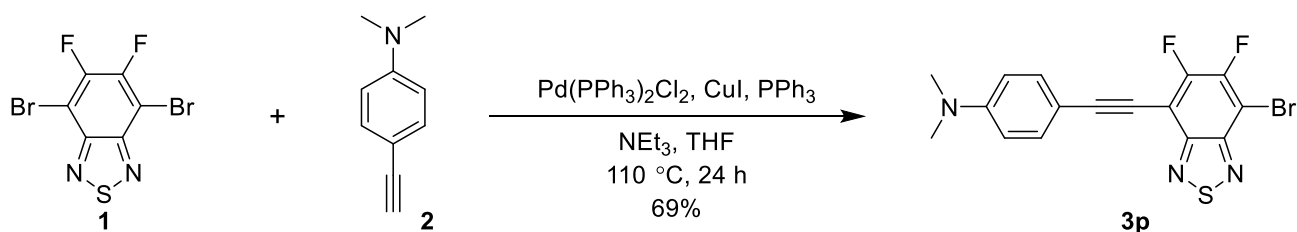

**Scheme S3.** Synthesis of compound **3p**.

The control compound **3p** was first reported and well characterized.

**4-((7-Bromo-5,6-difluorobenzo[c][1,2,5]thiadiazol-4-yl)ethynyl)-N,N-dimethylaniline (3p)**, orange solid (0.0543 g), 69 % yield; m.p. = 167.6-168.9 °C; <sup>1</sup>H NMR (CDCl<sub>3</sub>, 600 MHz): δ = 3.04 (s, 6H), 6.69 (d, *J* = 9.0 Hz, 2H), 7.56 (d, *J* = 9.0 Hz, 2H) ppm; <sup>13</sup>C NMR (CDCl<sub>3</sub>, 150 MHz): δ = 40.1, 76.4 (d, *J* = 4.8 Hz), 98.4 (dd, *J*<sub>1</sub> = 21.8 Hz, *J*<sub>2</sub> = 1.7 Hz), 104.7 (dd, *J*<sub>1</sub> = 15.6 Hz, *J*<sub>2</sub> = 2.9 Hz), 105.6 (d, *J* = 5.9 Hz), 108.1, 111.6, 133.5, 149.5 (d, *J* = 5.4 Hz), 149.8 (d, *J* = 6.2 Hz), 151.0, 152.1 (dd, *J*<sub>1</sub> = 255.6 Hz, *J*<sub>2</sub> = 19.1 Hz), 153.4 (dd, *J*<sub>1</sub> = 261.8 Hz, *J*<sub>2</sub> = 18.6 Hz) ppm; <sup>19</sup>F NMR (CDCl<sub>3</sub>, 564 MHz): δ = -124.4 (d, *J* = 19.7 Hz), -120.7 (d, *J* = 20.3 Hz) ppm; HRMS, *m/z* (%): Calcd for C<sub>16</sub>H<sub>11</sub>BrF<sub>2</sub>N<sub>3</sub>S<sup>+</sup> ([M+H]<sup>+</sup>): 393.9820 (100), 395.9799 (97), Found: 393.9812 (100), 395.9790 (97).

### 3. Analytical methods

**General procedure for optical spectral measurements.** The stock solutions of compounds **3a-3p** ( $10^{-3}$  M) were prepared in THF. Then, the  $10^{-5}$  M aqueous solutions of compounds **3a-3p** were prepared for the measurement of both UV-*vis* absorption and fluorescence spectra at room temperature. Both the excitation and emission slit widths were set at 5 nm during the fluorescence experiments.

**Method of theoretical calculations.** As the reported method,<sup>7</sup> all theoretical calculations were performed using Gaussian 09 serials software. The ground-state structures were obtained by B3LYP density functional method with basis set 6-31G (d,p) level. The HOMO and LUMO distributions were visualized using Gaussview 6.0 software.

**Preparing films.** Firstly, 1 mg of compound **3a** and 1.5 mL of dichloromethane were added into a 3 mL clear glass bottle. After **3a** was fully dissolved, 100 mg of poly(methylmethacrylate) (PMMA)<sup>8</sup> was added. After standing the mixed solution still for 3 h, PMMA was completely dissolved. Then, using a glass glue tip dropper to pipette an appropriate amount of solution into the quartz round mold, and letting it dry naturally made the preparation of the **3a**-coated thinfilm completed. Similarly, **3b-3p** films were prepared using the same method.

**Cell viability.** According to the literature,<sup>9</sup> to evaluate the biocompatibility of dye **3m**, the cell viability of 4T1 mouse breast cancer cells stained by **3m** with different concentrations was tested. Cells were seeded in 96-well plates at a density of  $5 \times 10^3$  cells/well and cultured in standard medium for 12 h. The cells were then incubated with various concentrations of **3m** (10, 30, 60, 80 and 100  $\mu\text{g/mL}$ ) in the dark for 48 h. Then, MTT solution (100  $\mu\text{L}$ , 0.5 mg/mL) was added into each well and incubated for 4 h. Next, DMSO (100  $\mu\text{L}$ , 15 min) was added into each well to dissolve the purple formazan crystals. The absorbance of MTT at 490 nm was measured by the microplate reader.

**Cell imaging**<sup>10</sup>. The 4T1 cells were cultured in 1640 medium containing 10% fetal bovine serum (FBS) and 1% penicillin streptomycin (100  $\mu\text{g/mL}$ ) in a 5%  $\text{CO}_2$  humidified incubator at 37°C. The 4T1 cells ( $5 \times 10^3$  cells/well) were cultured 12 h and then stained with the **3m** solution (DMSO, 50 and 100  $\mu\text{g/mL}$ ). After the cells continue to be incubated in the medium for 12 h, cell imaging is performed using confocal laser scanning microscopy ( $\lambda_{\text{ex}} = 405$  nm,  $\lambda_{\text{em}} = 620\text{-}670$  nm, scale bars = 25  $\mu\text{m}$ ).

#### 4. $^1\text{H}$ , $^{13}\text{C}$ , $^{19}\text{F}$ NMR and HRMS spectra of compounds 3a-3p

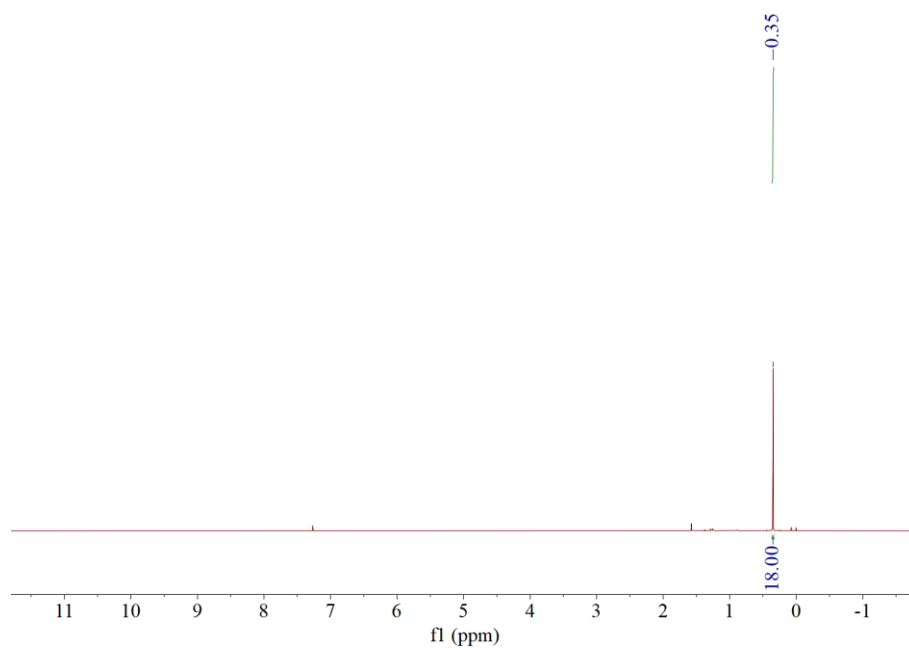

**Fig. S1.**  $^1\text{H}$  NMR spectrum of compound 3a.

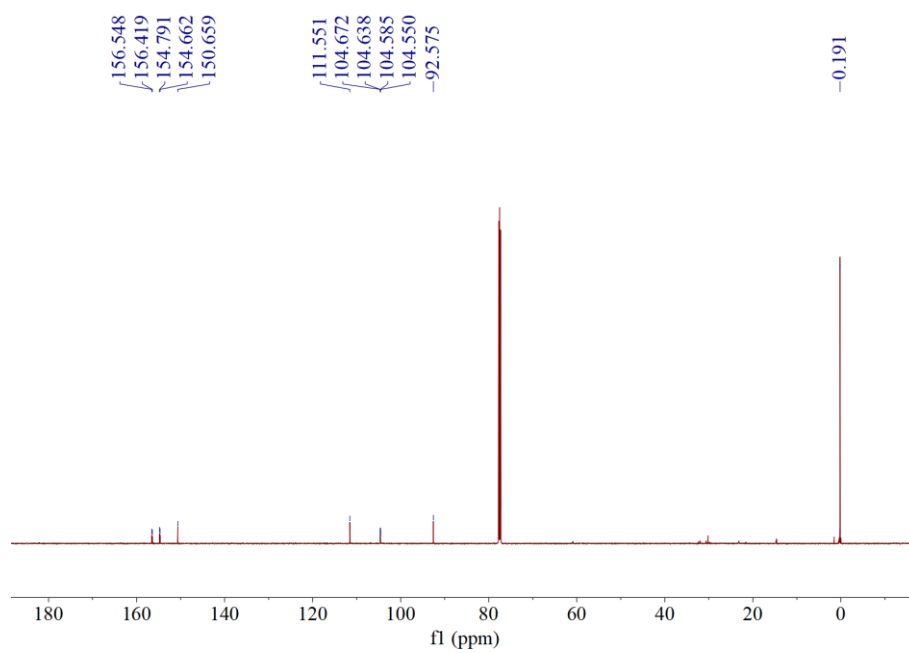

**Fig. S2.**  $^{13}\text{C}$  NMR spectrum of compound 3a.

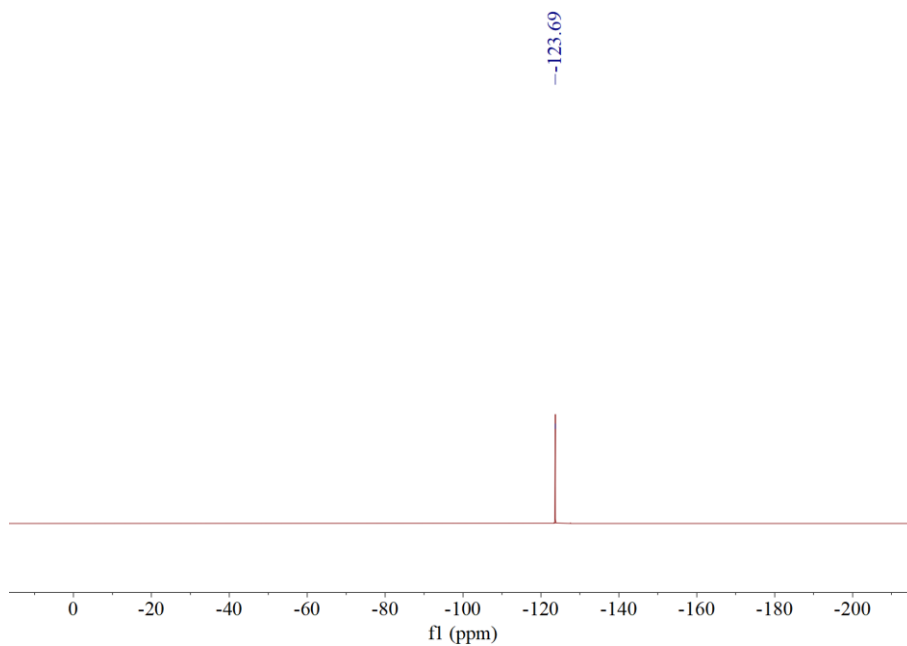

**Fig. S3.**  $^{19}\text{F}$  NMR spectrum of compound **3a**.

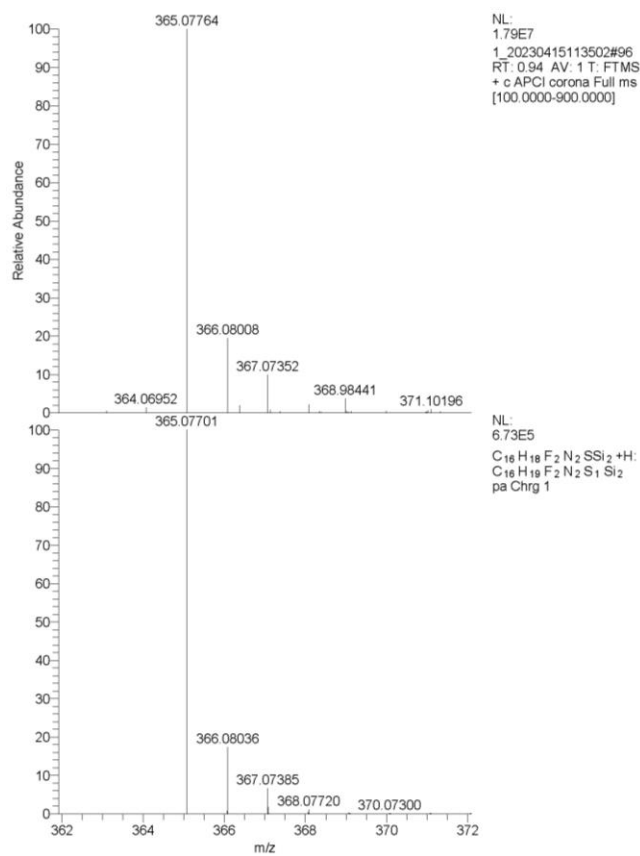

**Fig. S4.** HRMS spectrum of compound **3a**.

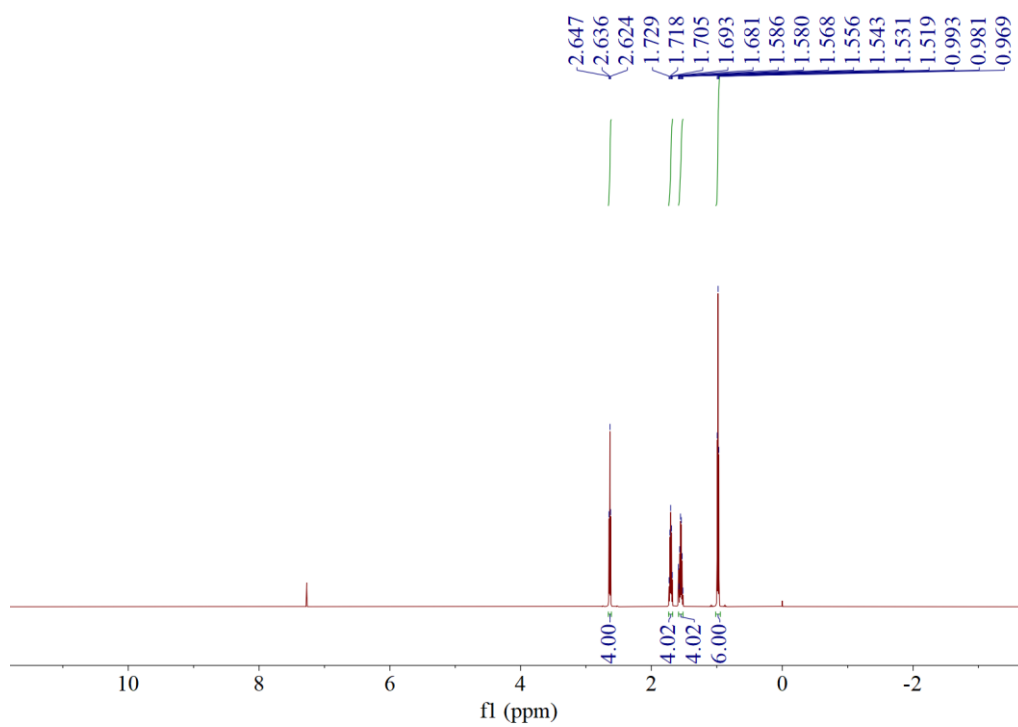

**Fig. S5.**  $^1\text{H}$  NMR spectrum of compound **3b**.

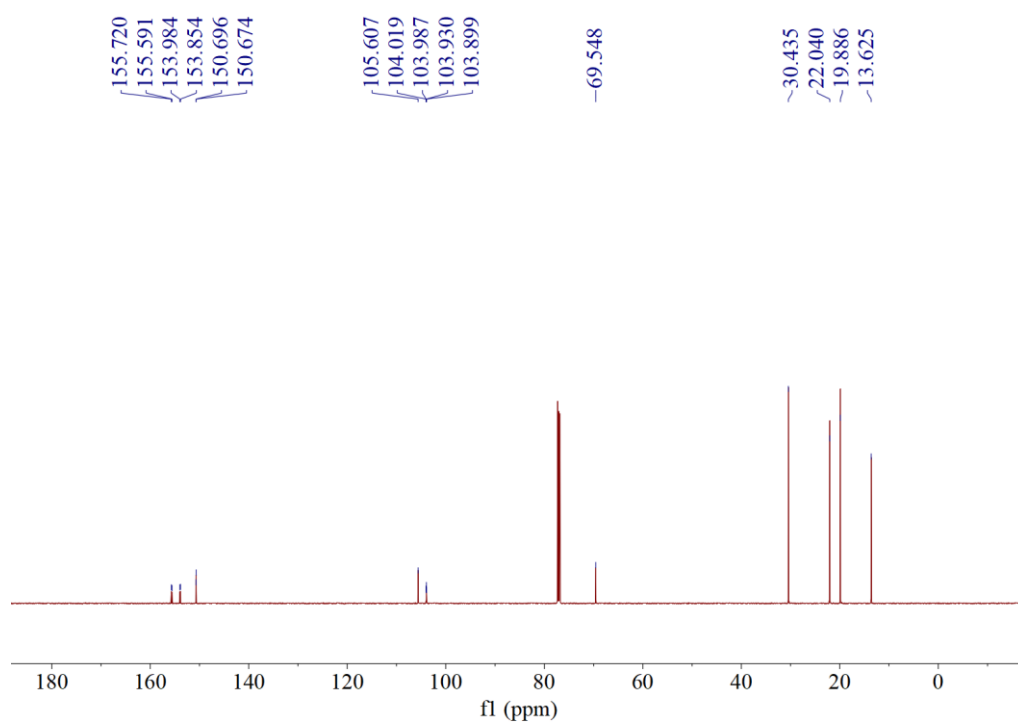

**Fig. S6.**  $^{13}\text{C}$  NMR spectrum of compound **3b**.

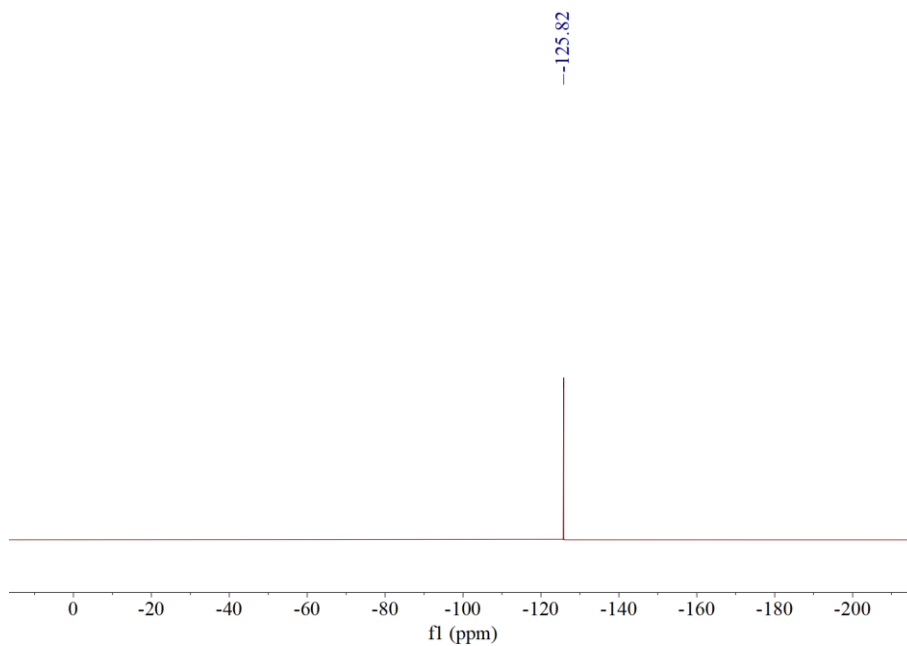

**Fig. S7.**  $^{19}\text{F}$  NMR spectrum of compound **3b**.

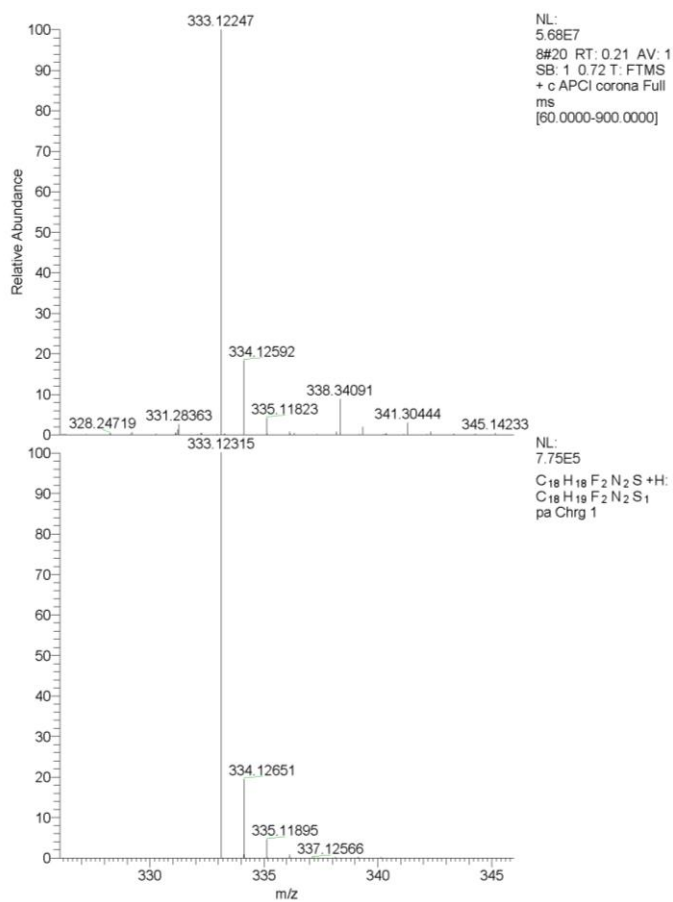

**Fig. S8.** HRMS spectrum of compound **3b**.

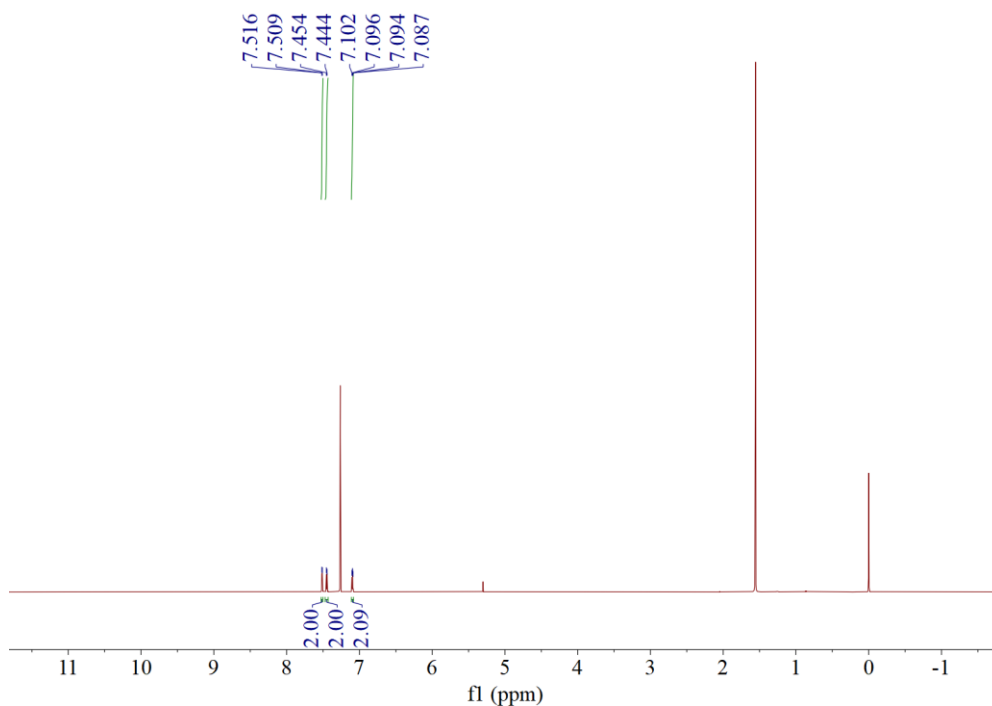

**Fig. S9.**  $^1\text{H}$  NMR spectrum of compound **3c**.

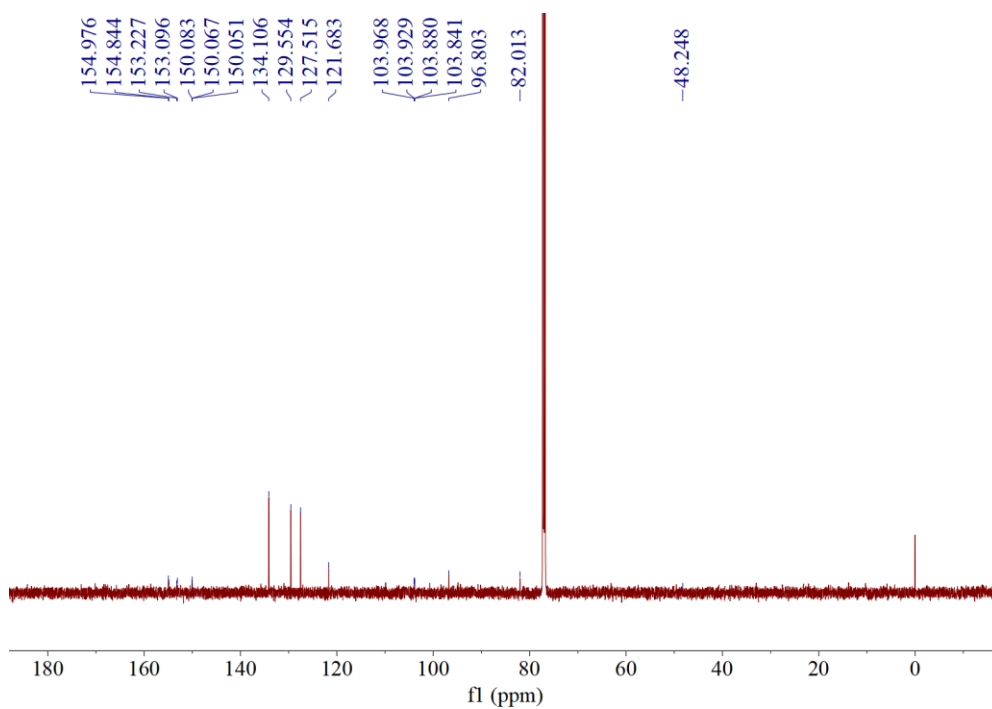

**Fig. S10.**  $^{13}\text{C}$  NMR spectrum of compound **3c**.

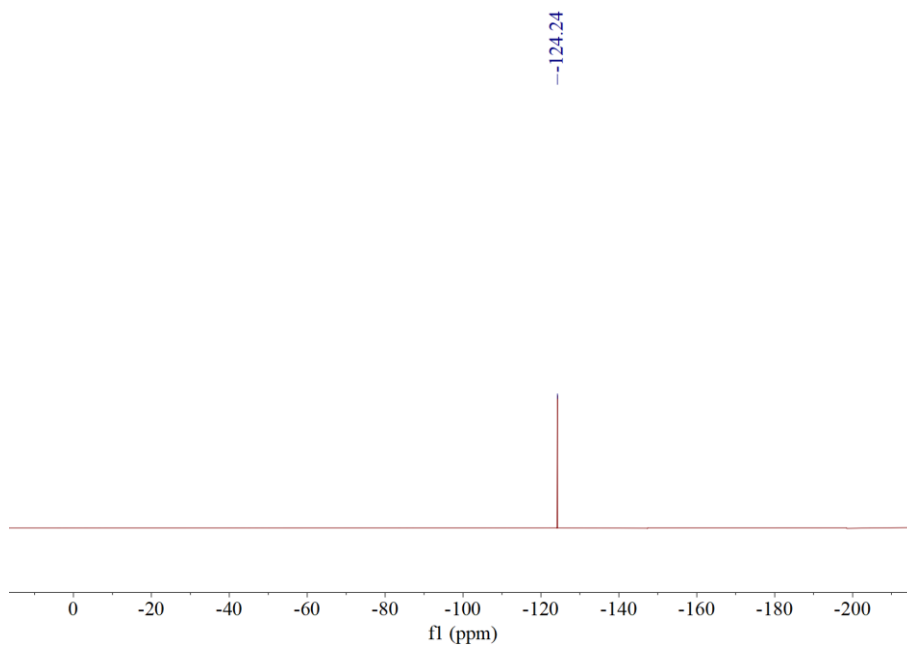

**Fig. S11.**  $^{19}\text{F}$  NMR spectrum of compound **3c**.

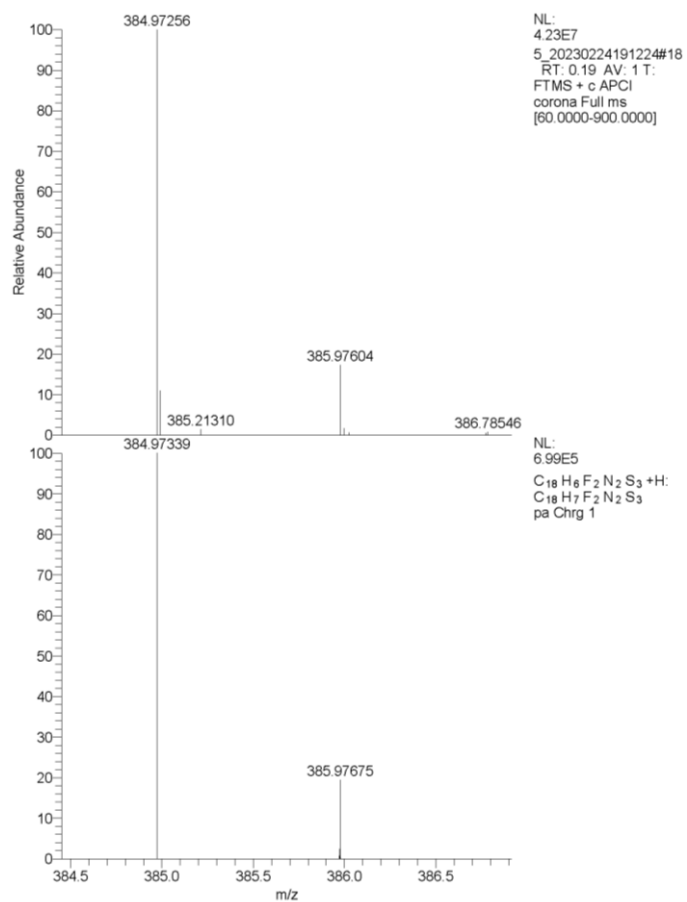

**Fig. S12.** HRMS spectrum of compound **3c**.



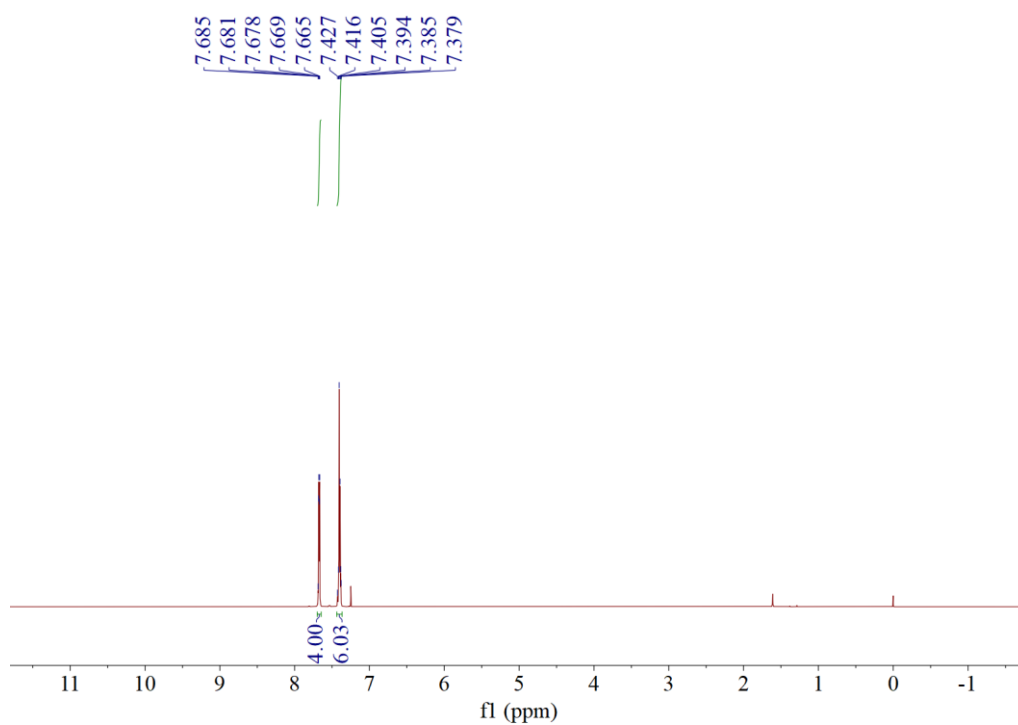

**Fig. S13.**  $^1\text{H}$  NMR spectrum of compound **3d**.

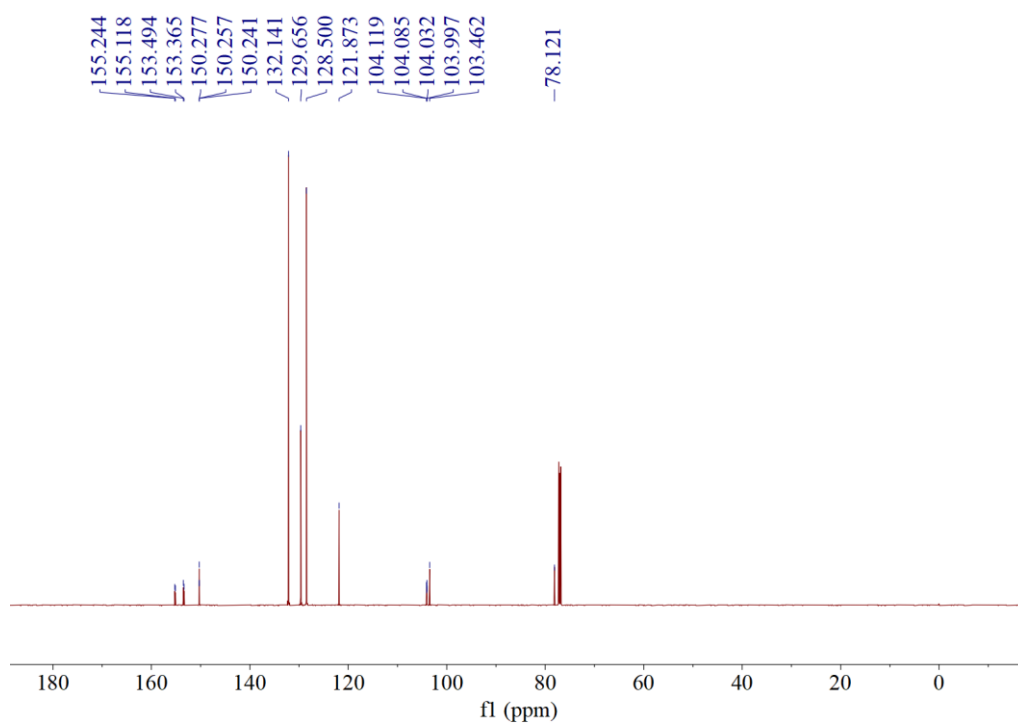

**Fig. S14.**  $^{13}\text{C}$  NMR spectrum of compound **3d**.

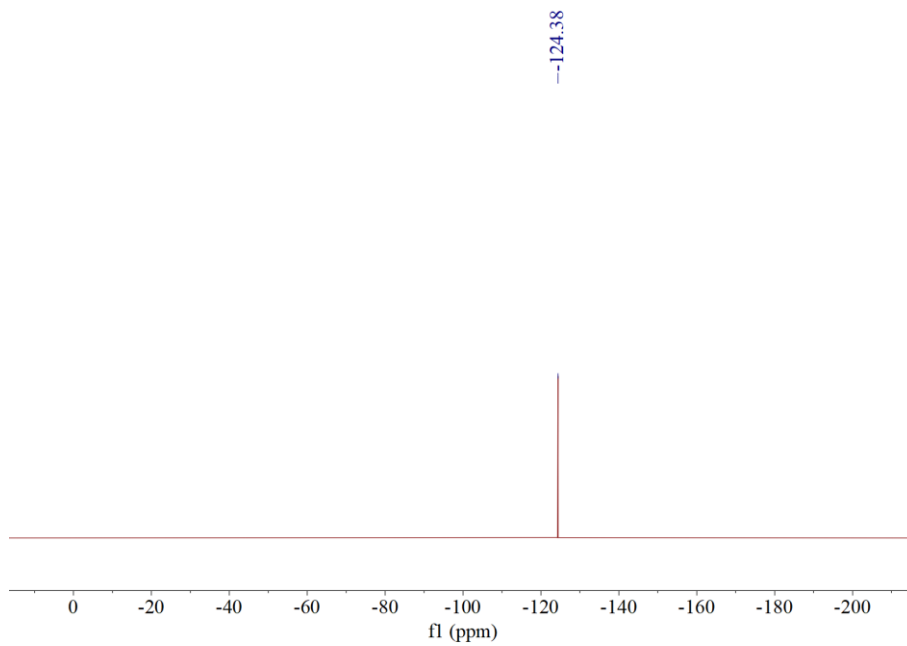

**Fig. S15.**  $^{19}\text{F}$  NMR spectrum of compound **3d**.

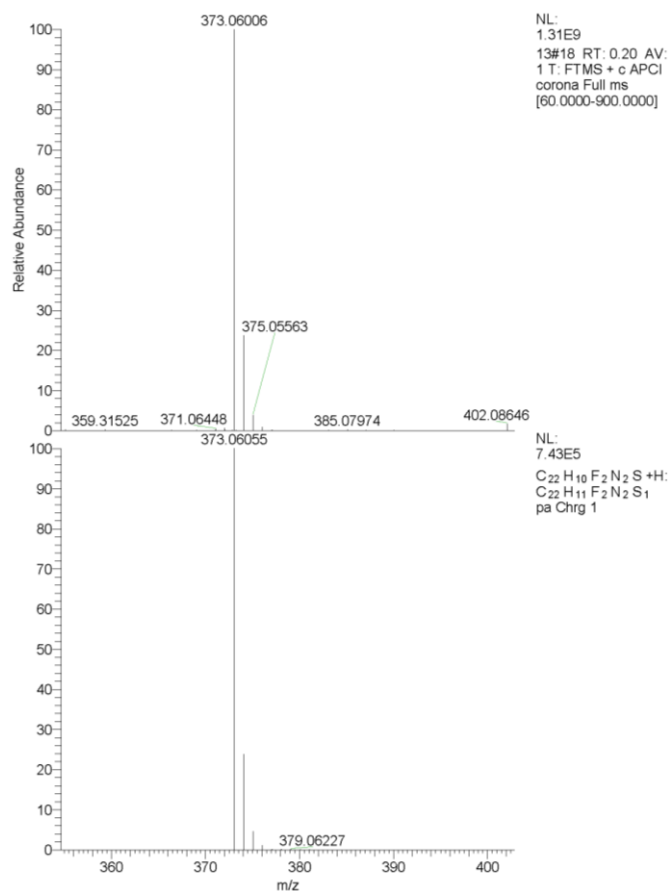

**Fig. S16.** HRMS spectrum of compound **3d**.

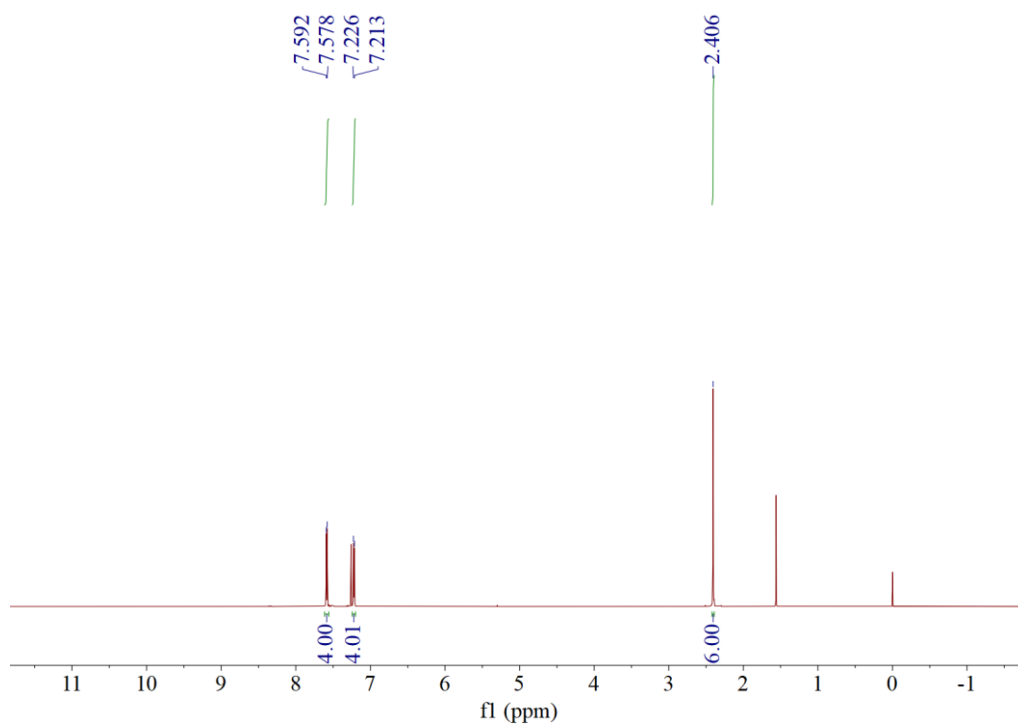

**Fig. S17.**  $^1\text{H}$  NMR spectrum of compound **3e**.

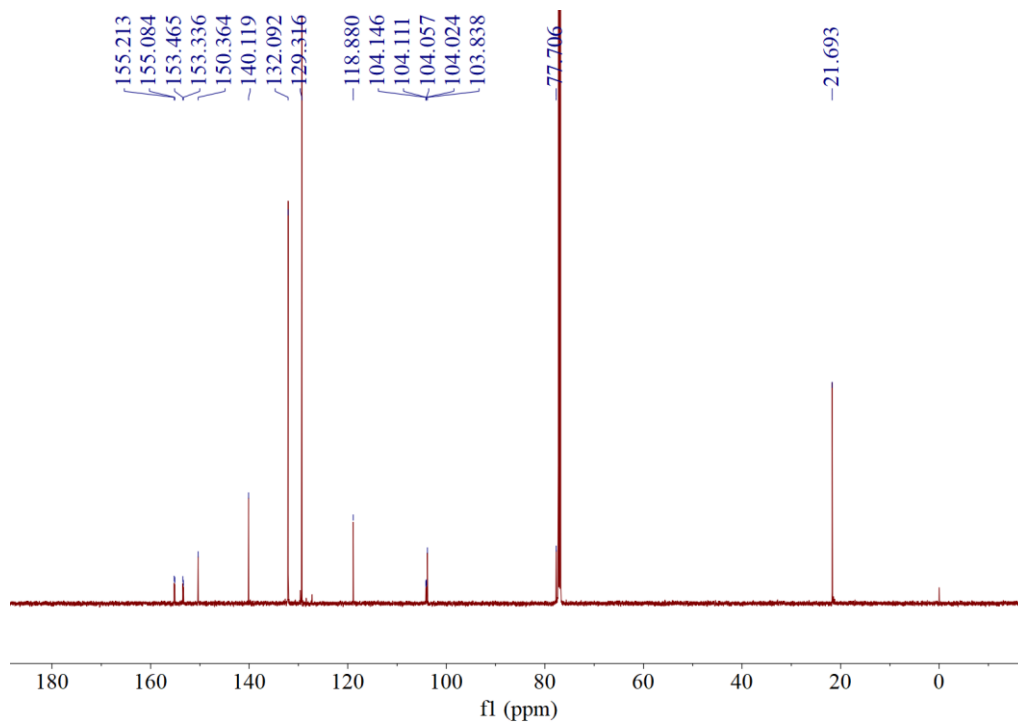

**Fig. S18.**  $^{13}\text{C}$  NMR spectrum of compound **3e**.

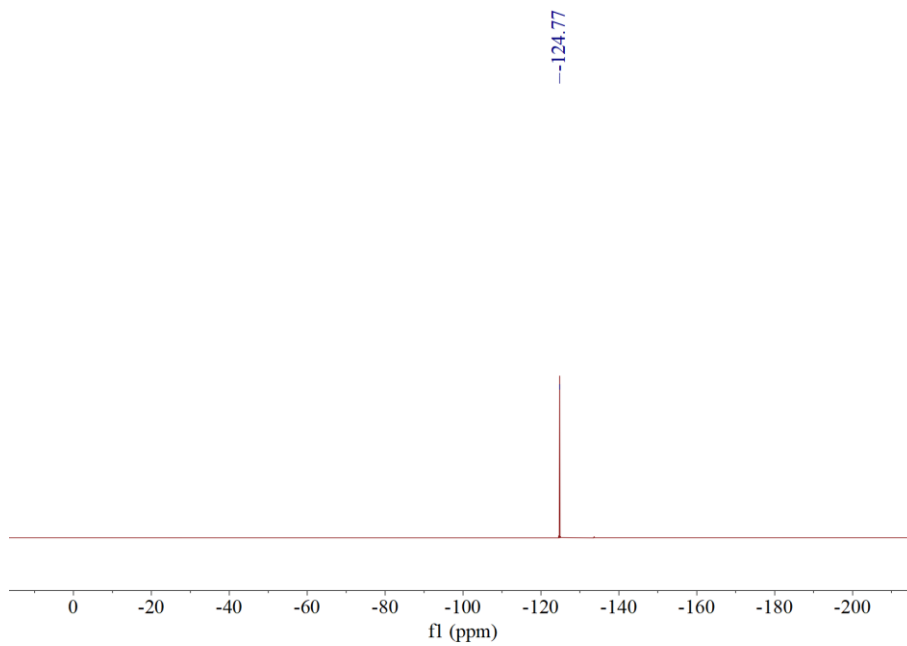

**Fig. S19.**  $^{19}\text{F}$  NMR spectrum of compound **3e**.

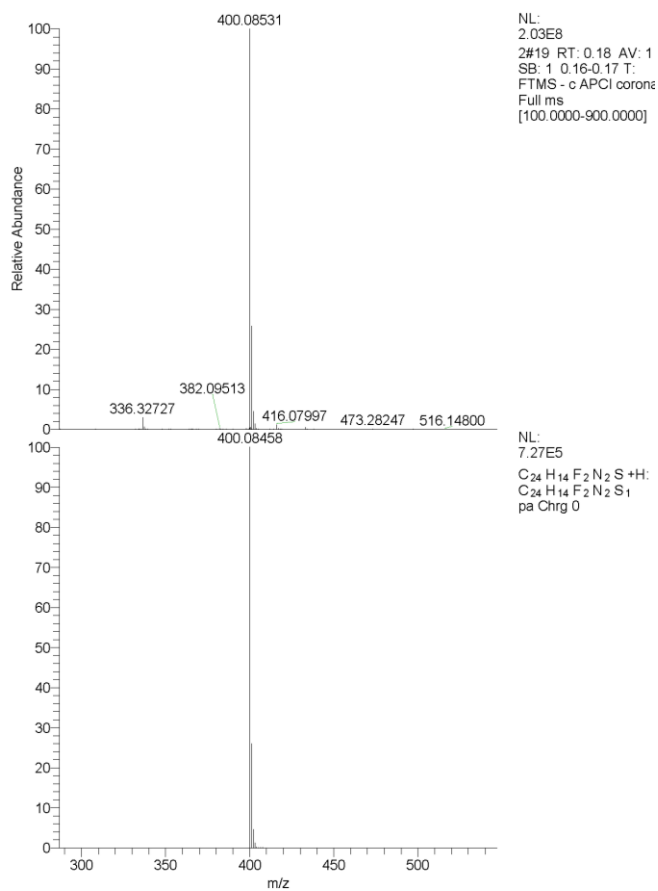

**Fig. S20.** HRMS spectrum of compound **3e**.

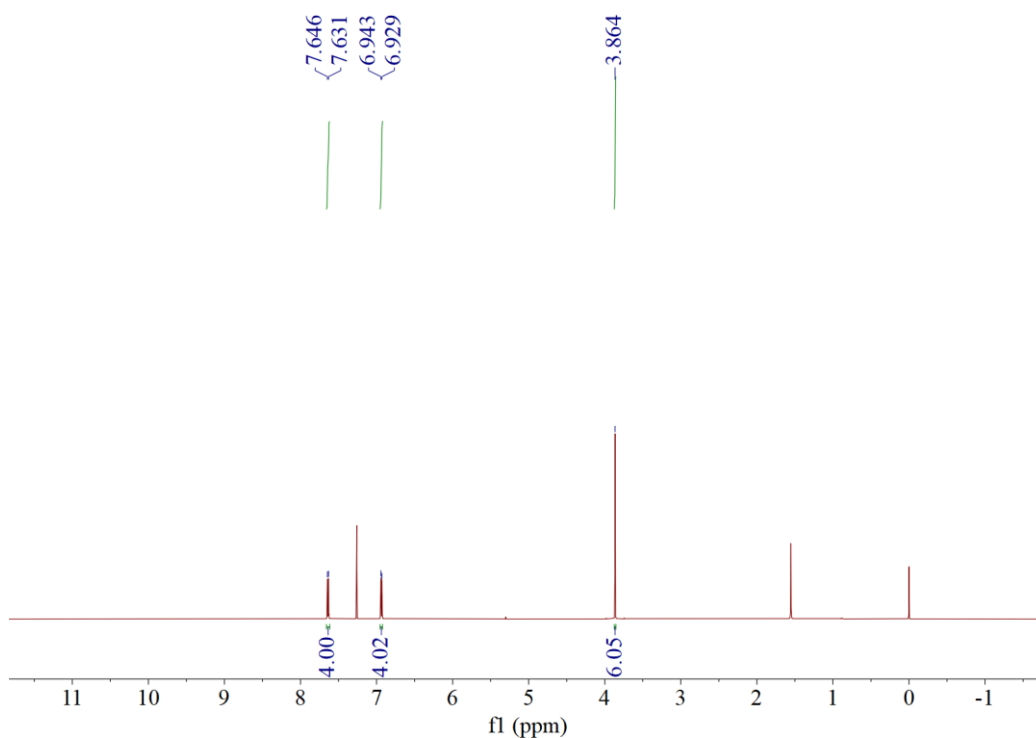

**Fig. S21.**  $^1\text{H}$  NMR spectrum of compound **3f**.

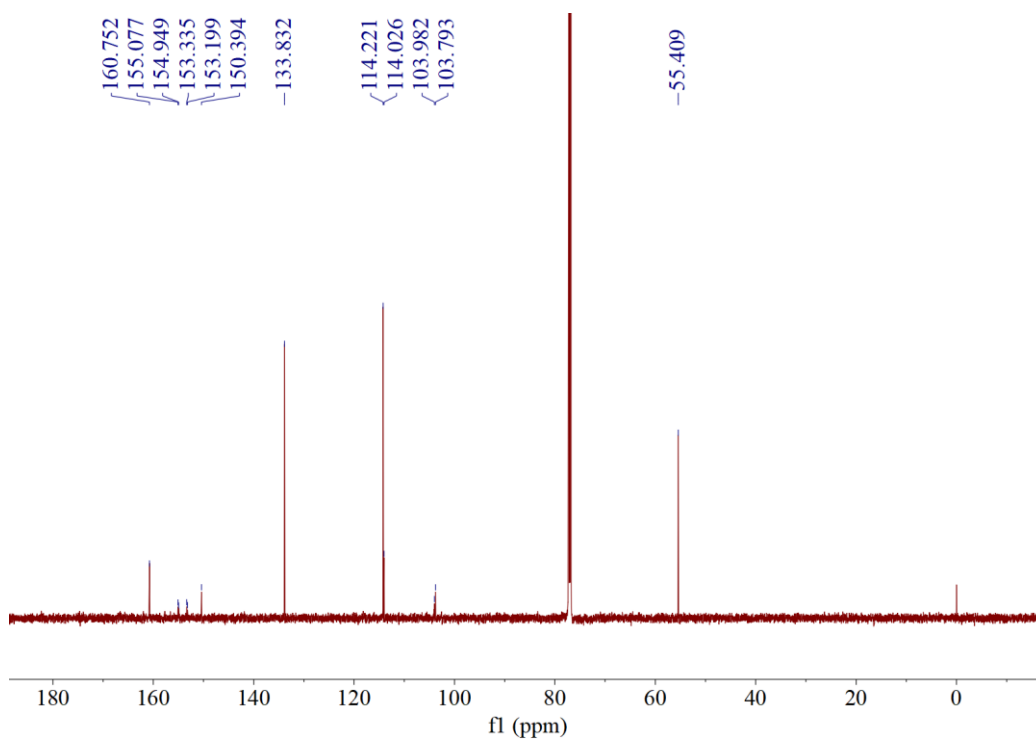

**Fig. S22.**  $^{13}\text{C}$  NMR spectrum of compound **3f**.

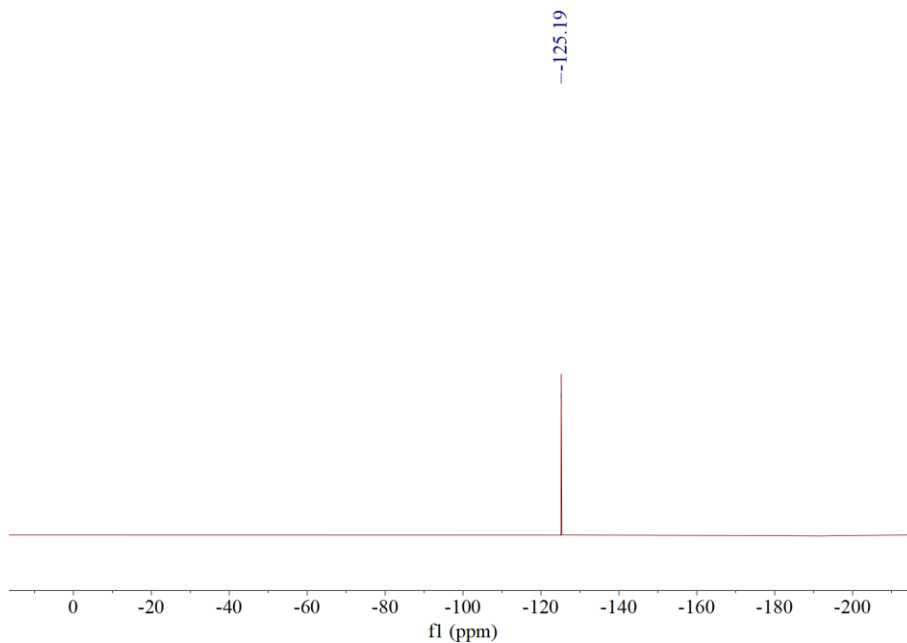

**Fig. S23.**  $^{19}\text{F}$  NMR spectrum of compound **3f**.

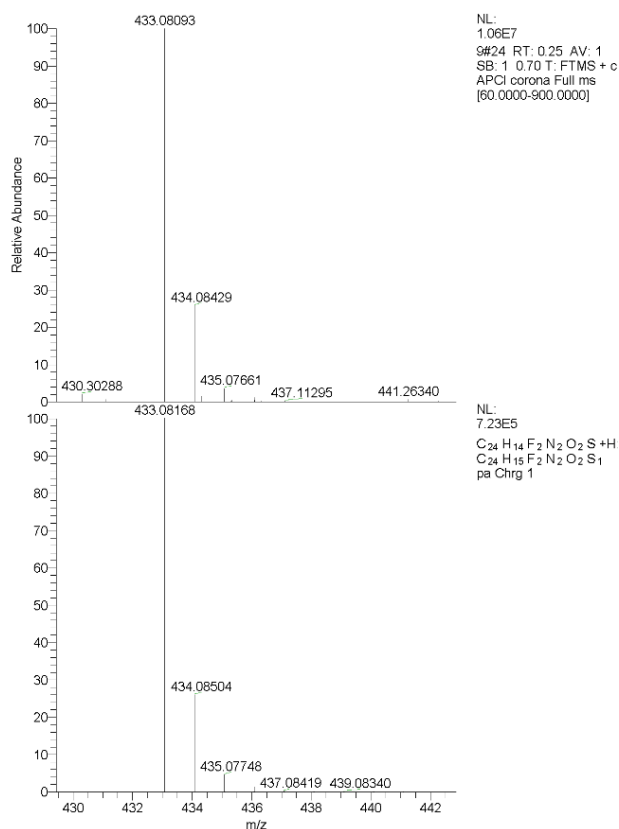

**Fig. S24.** HRMS spectrum of compound **3f**.

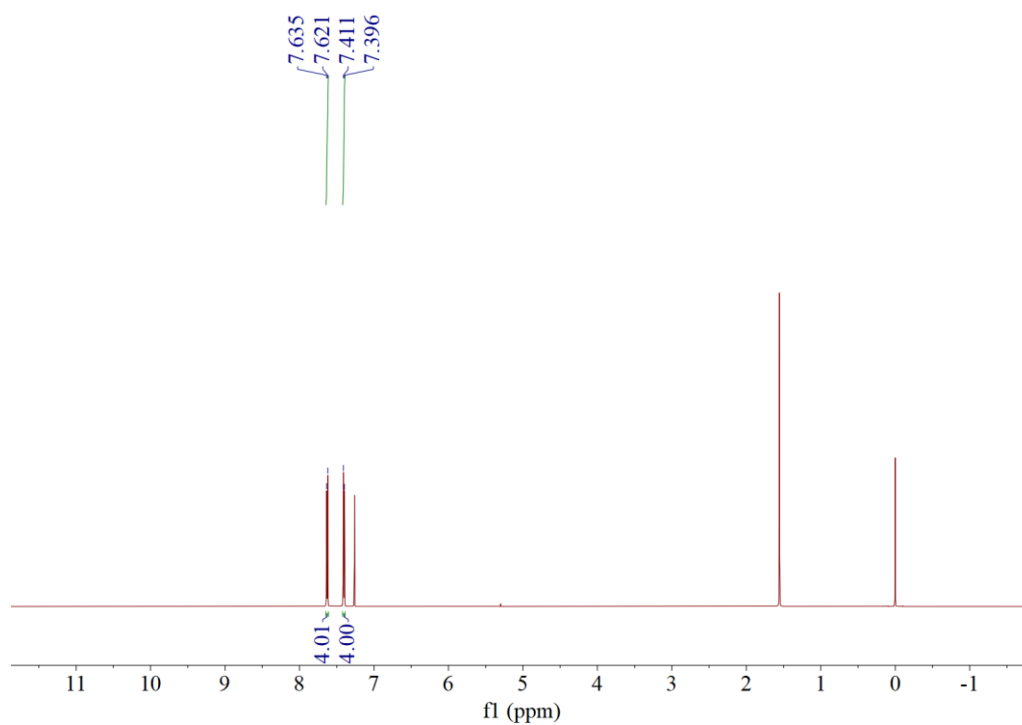

**Fig. S25.**  $^1\text{H}$  NMR spectrum of compound **3g**.

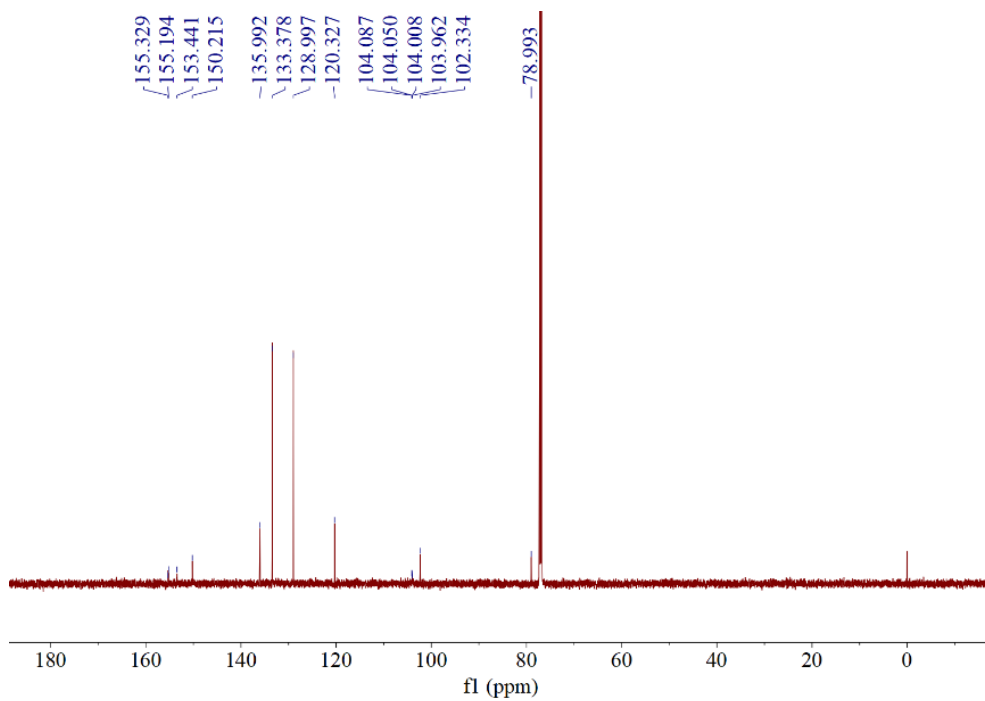

**Fig. S26.**  $^{13}\text{C}$  NMR spectrum of compound **3g**.

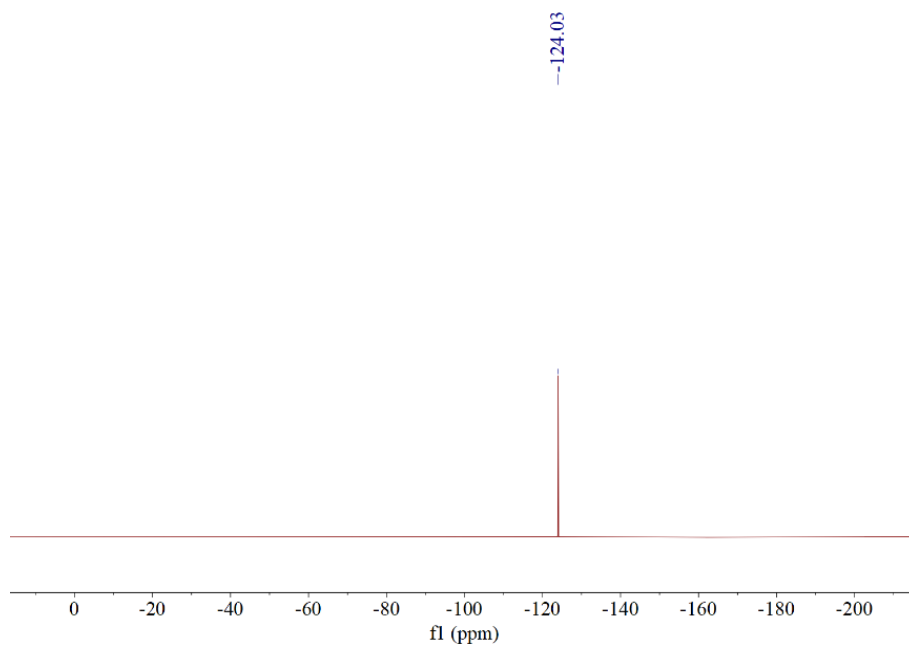

**Fig. S27.**  $^{19}\text{F}$  NMR spectrum of compound **3g**.

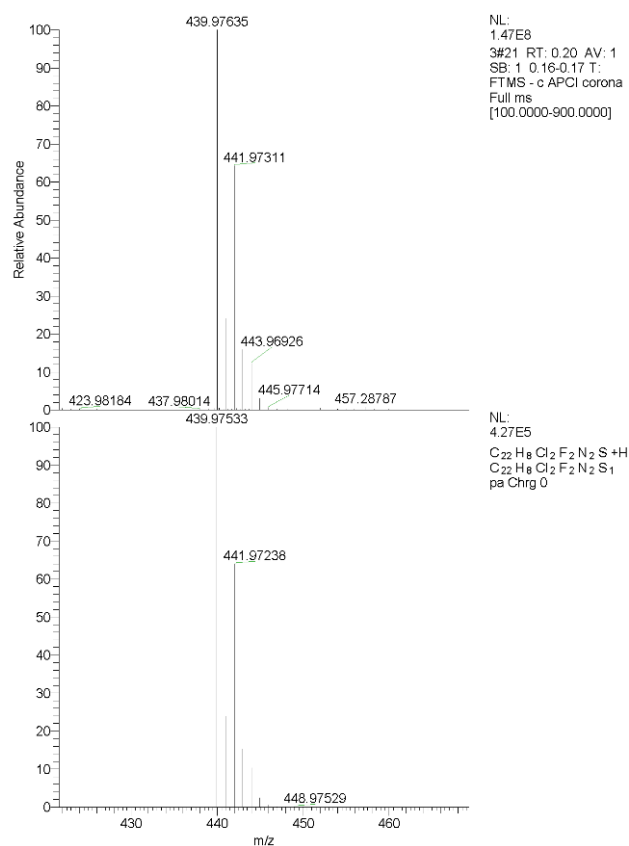

**Fig. S28.** HRMS spectrum of compound **3g**.



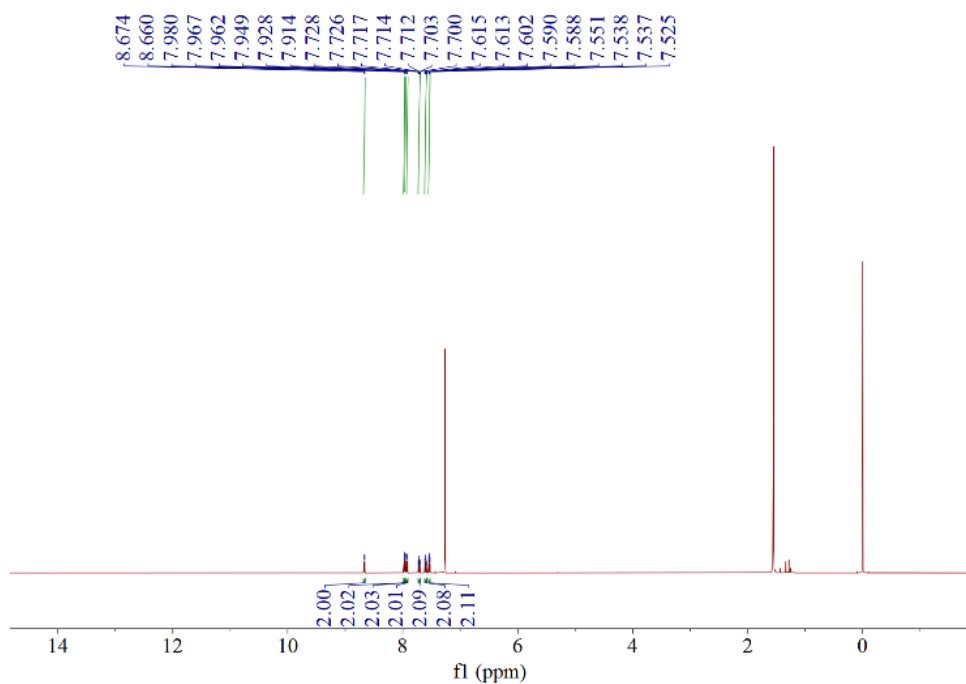

**Fig. S29.**  $^1\text{H}$  NMR spectrum of compound **3h**.

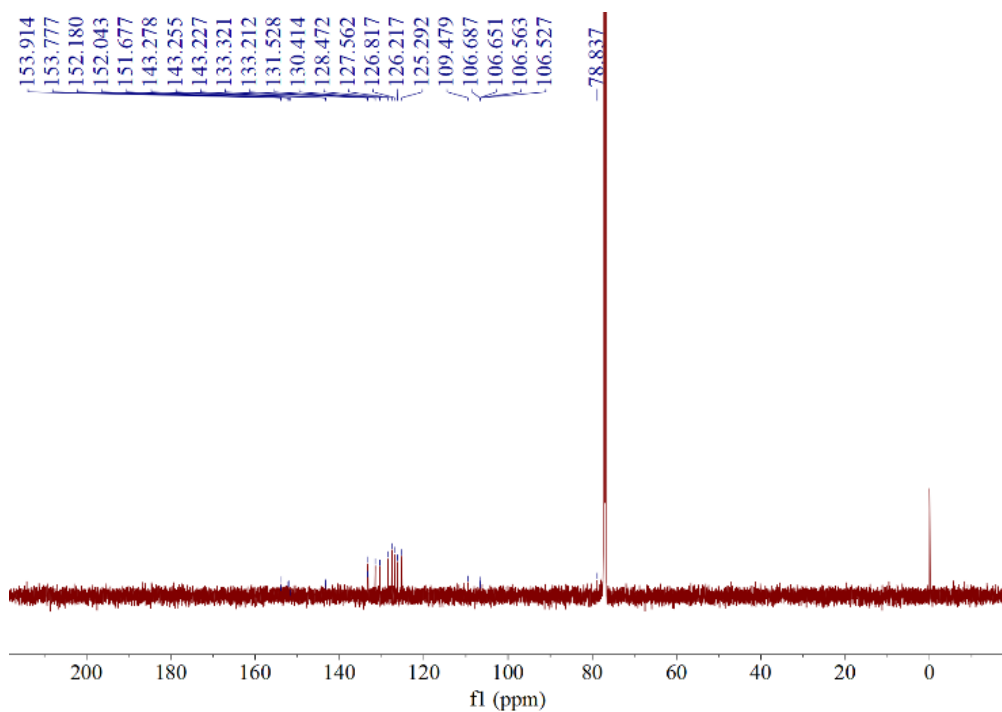

**Fig. S30.**  $^{13}\text{C}$  NMR spectrum of compound **3h**.

--124.53

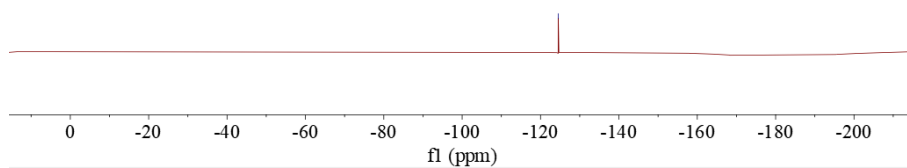

**Fig. S31.**  $^{19}\text{F}$  NMR spectrum of compound **3h**.

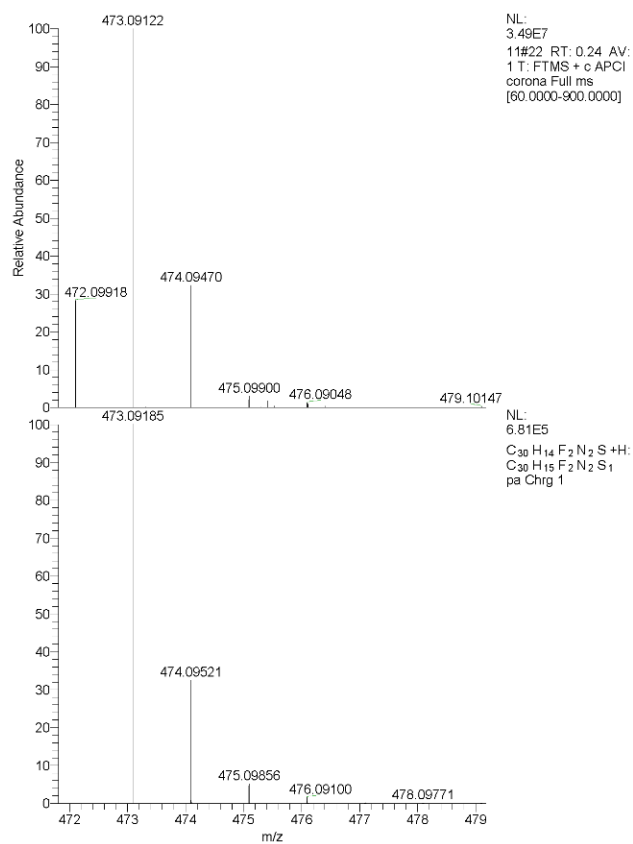

**Fig. S32.** HRMS spectrum of compound **3h**.

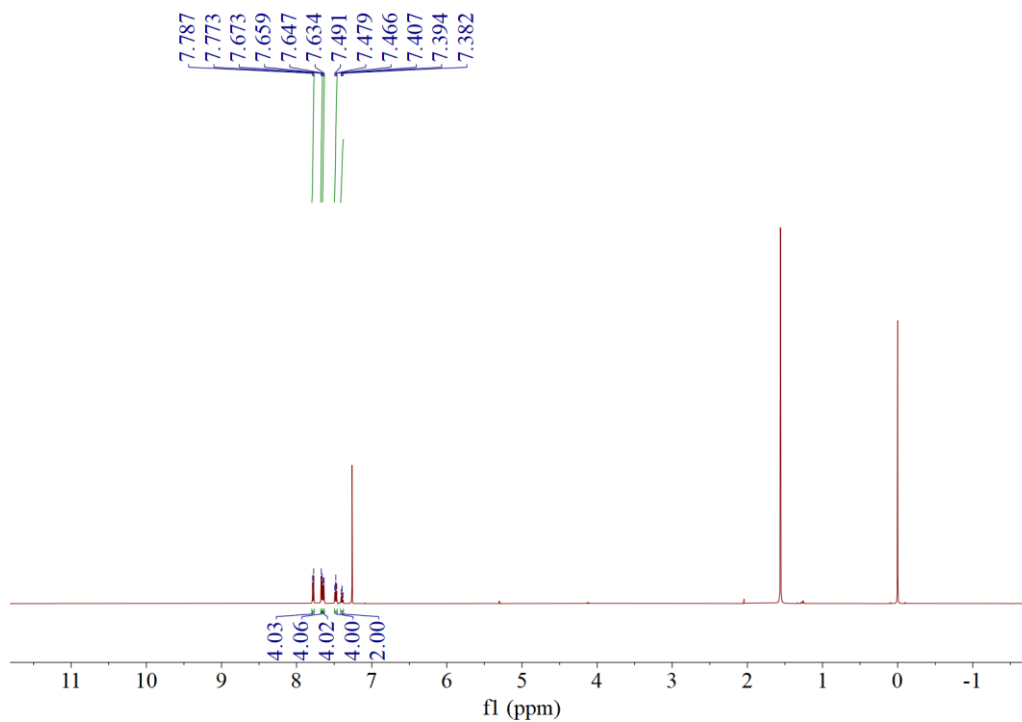

**Fig. S33.**  $^1\text{H}$  NMR spectrum of compound **3i**.

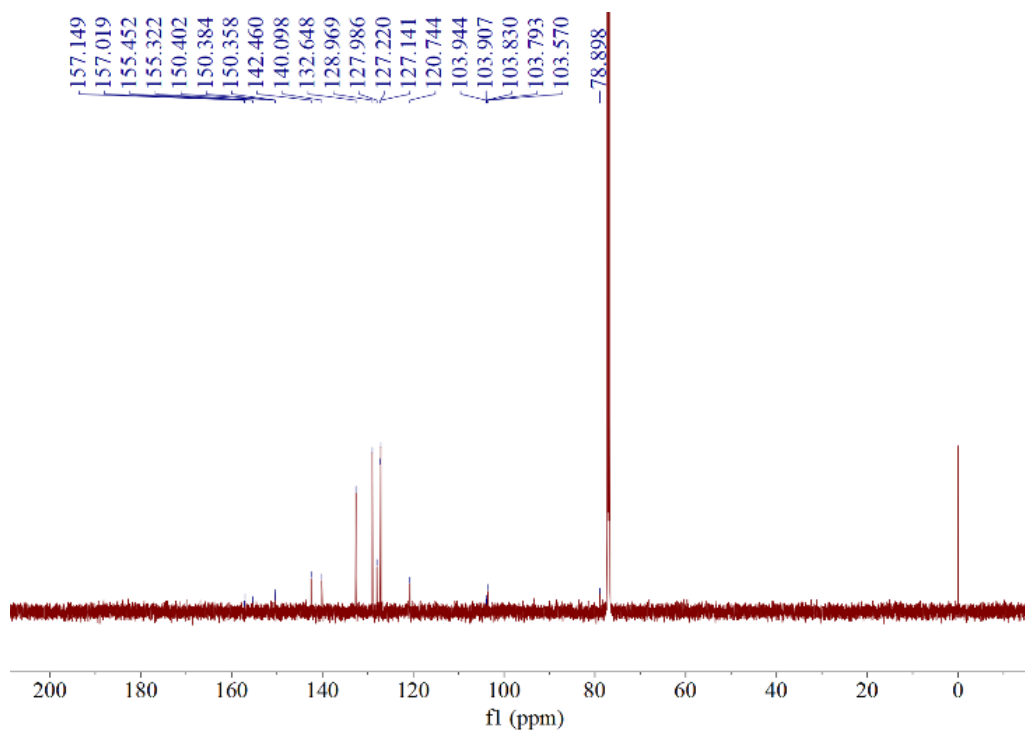

**Fig. S34.**  $^{13}\text{C}$  NMR spectrum of compound **3i**.

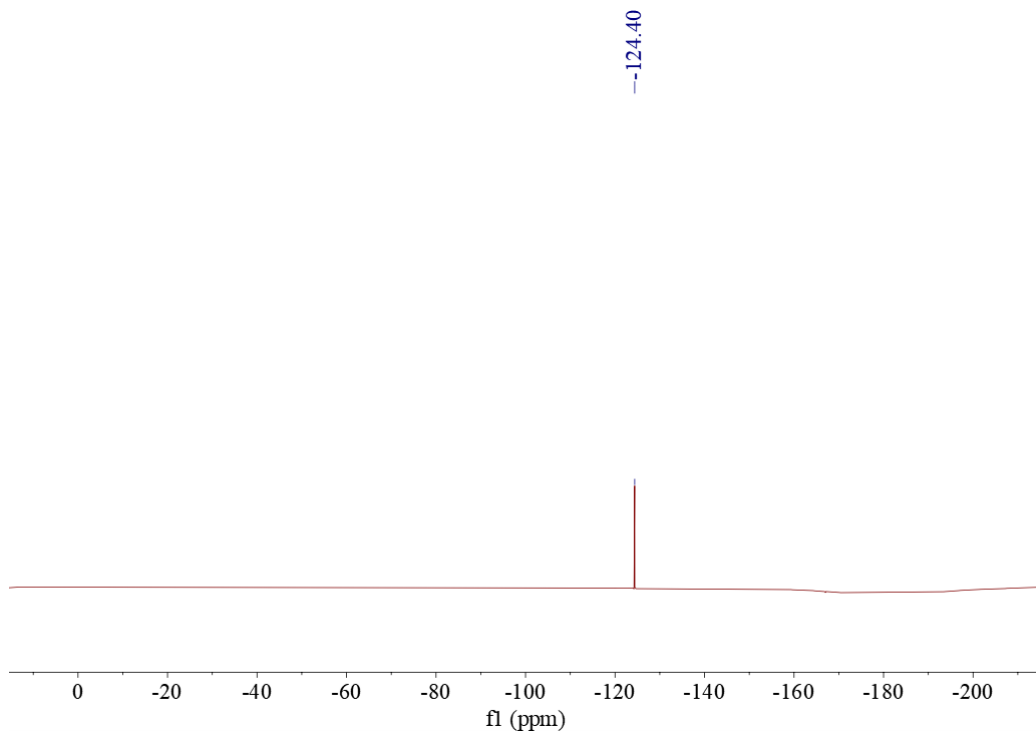

**Fig. S35.**  $^{19}\text{F}$  NMR spectrum of compound **3i**.

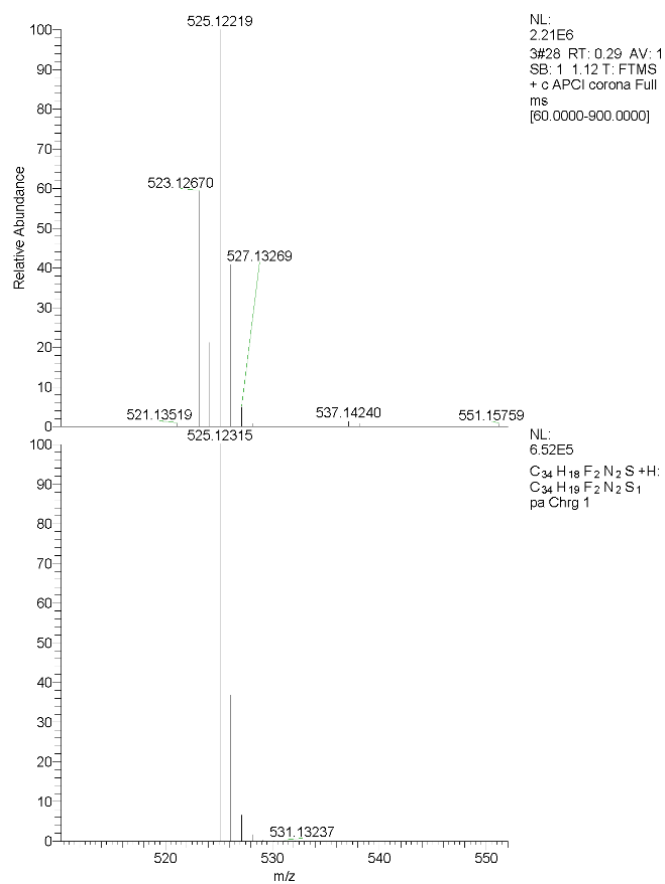

**Fig. S36.** HRMS spectrum of compound **3i**.

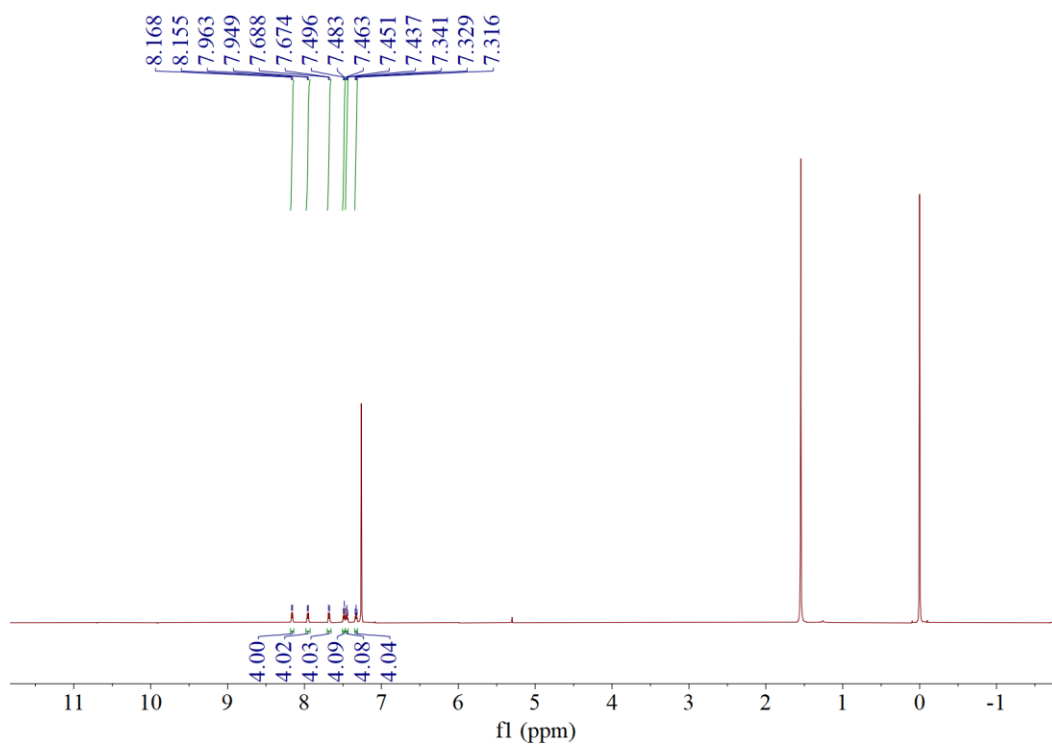

**Fig. S37.**  $^1\text{H}$  NMR spectrum of compound **3j**.

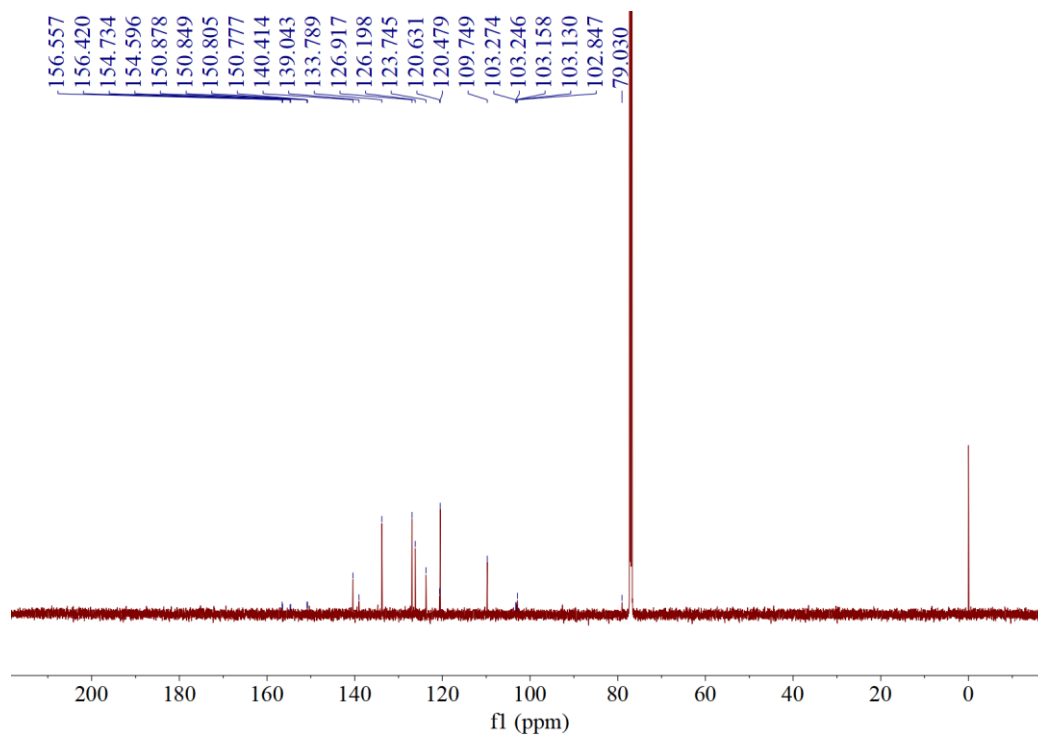

**Fig. S38.**  $^{13}\text{C}$  NMR spectrum of compound **3j**.

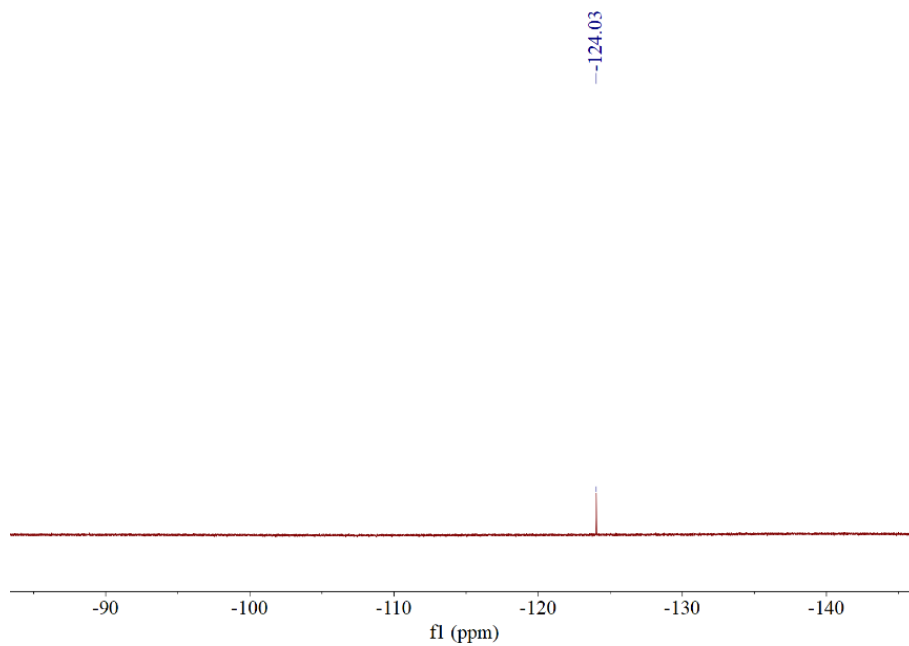

**Fig. S39.**  $^{19}\text{F}$  NMR spectrum of compound **3j**.

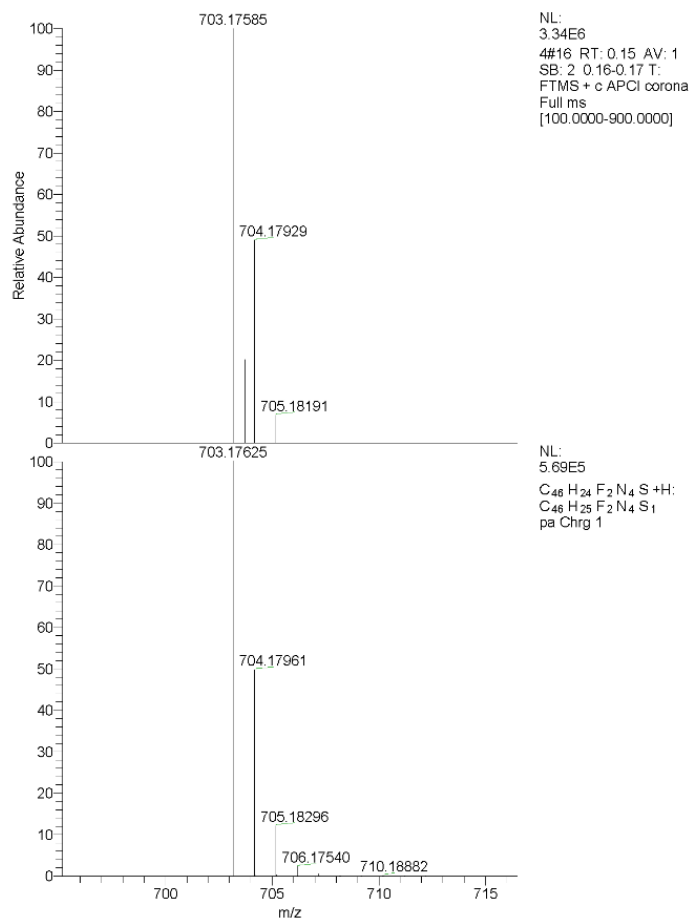

**Fig. S40.** HRMS spectrum of compound **3j**.

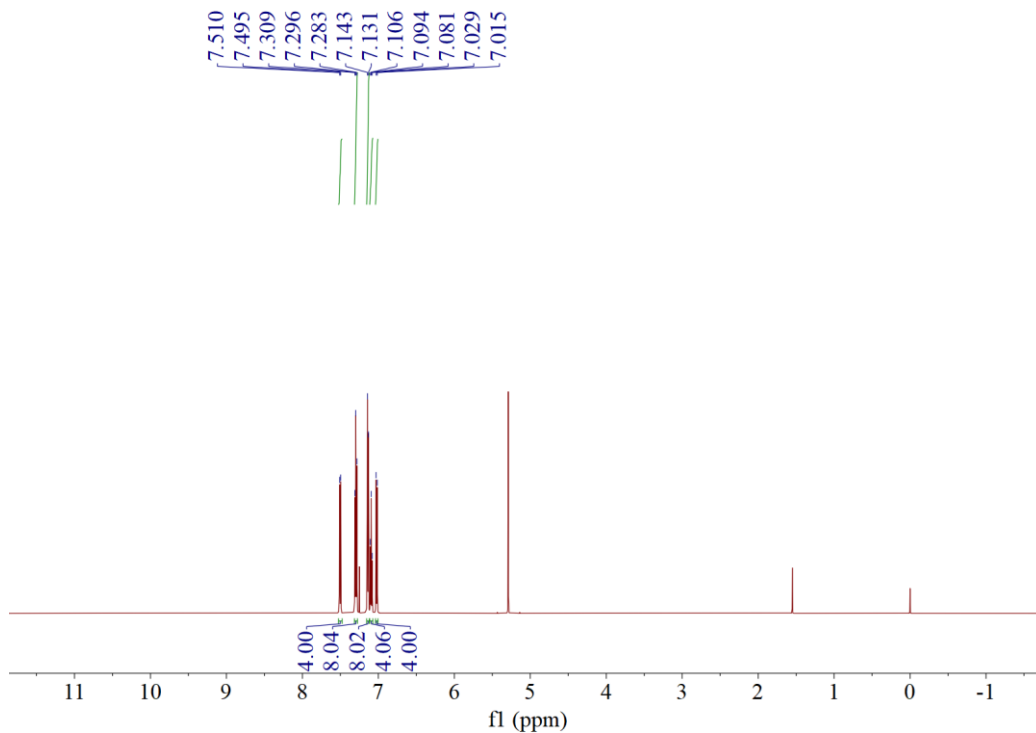

**Fig. S41.**  $^1\text{H}$  NMR spectrum of compound **3k**.

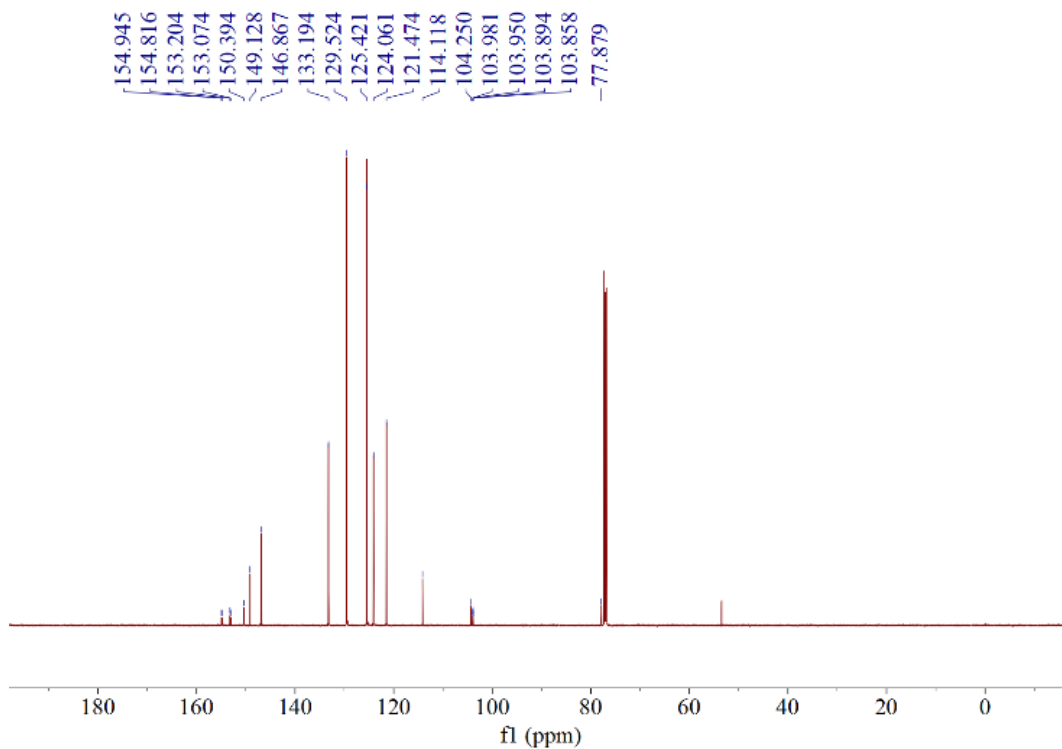

**Fig. S42.**  $^{13}\text{C}$  NMR spectrum of compound **3k**.

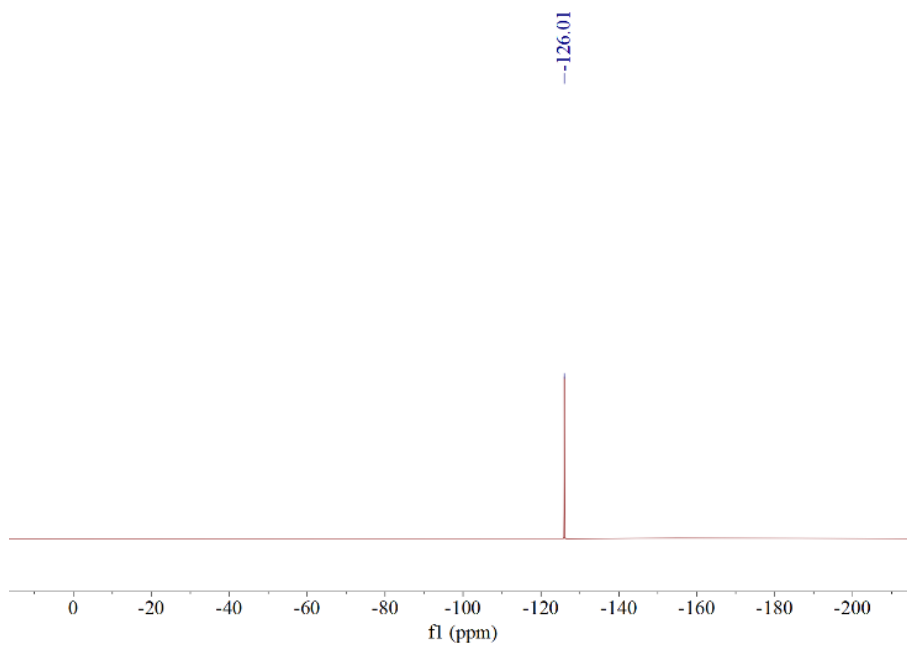

**Fig. S43.**  $^{19}\text{F}$  NMR spectrum of compound **3k**.

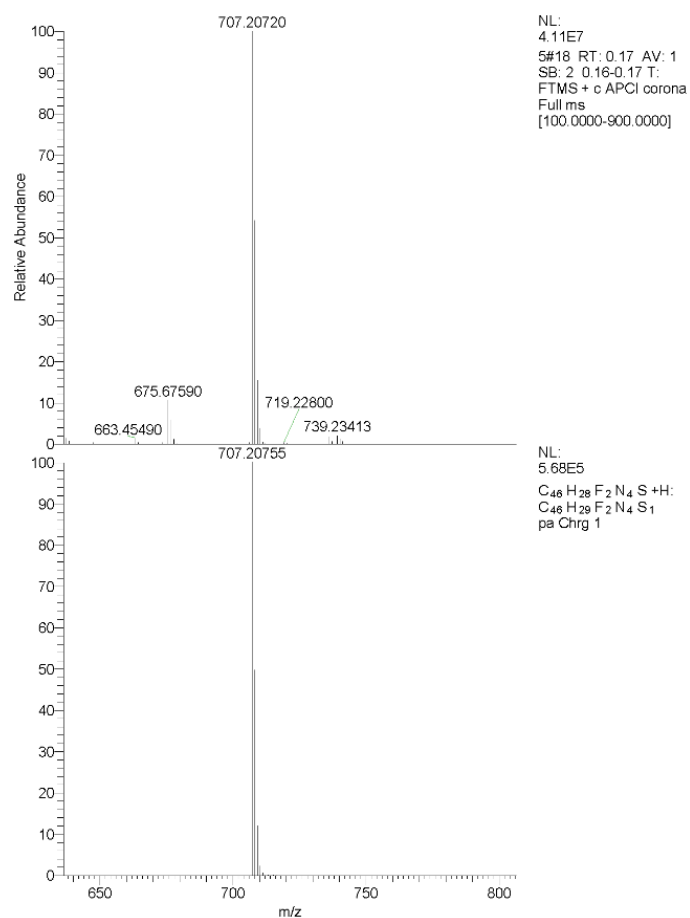

**Fig. S44.** HRMS spectrum of compound **3k**.



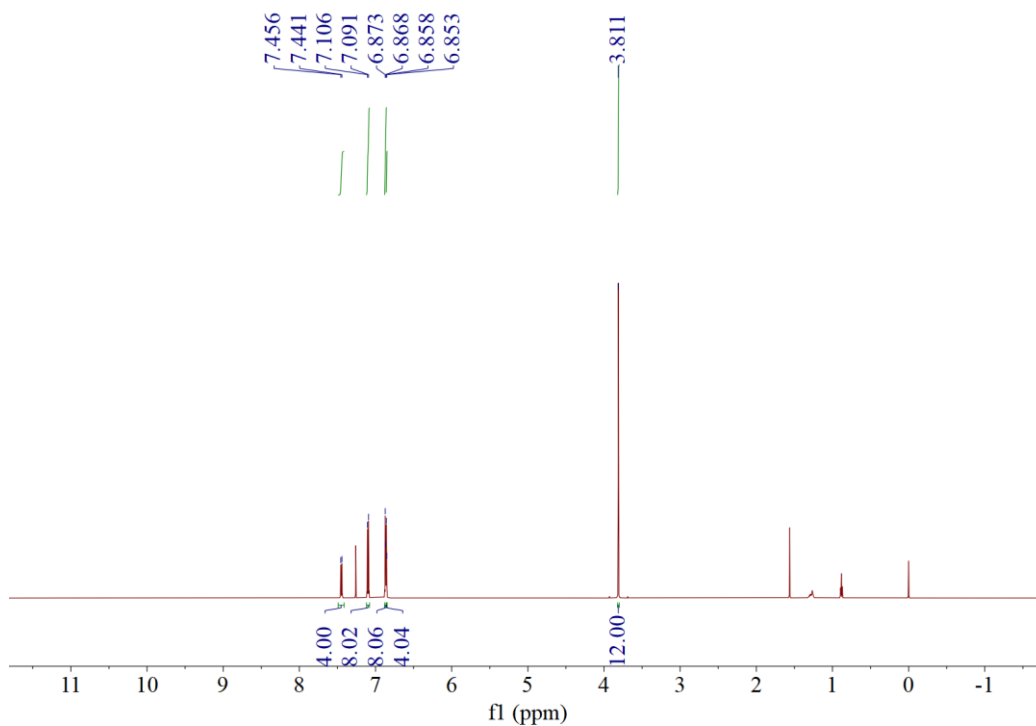

**Fig. S45.**  $^1\text{H}$  NMR spectrum of compound **3I**.

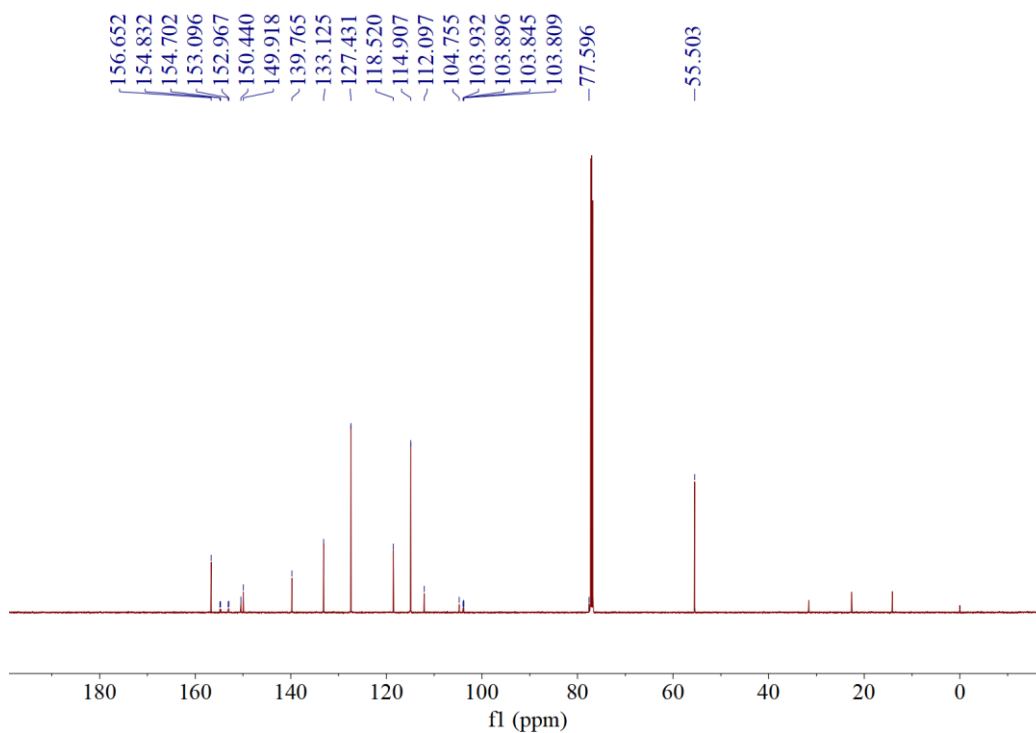

**Fig. S46.**  $^{13}\text{C}$  NMR spectrum of compound **3I**.

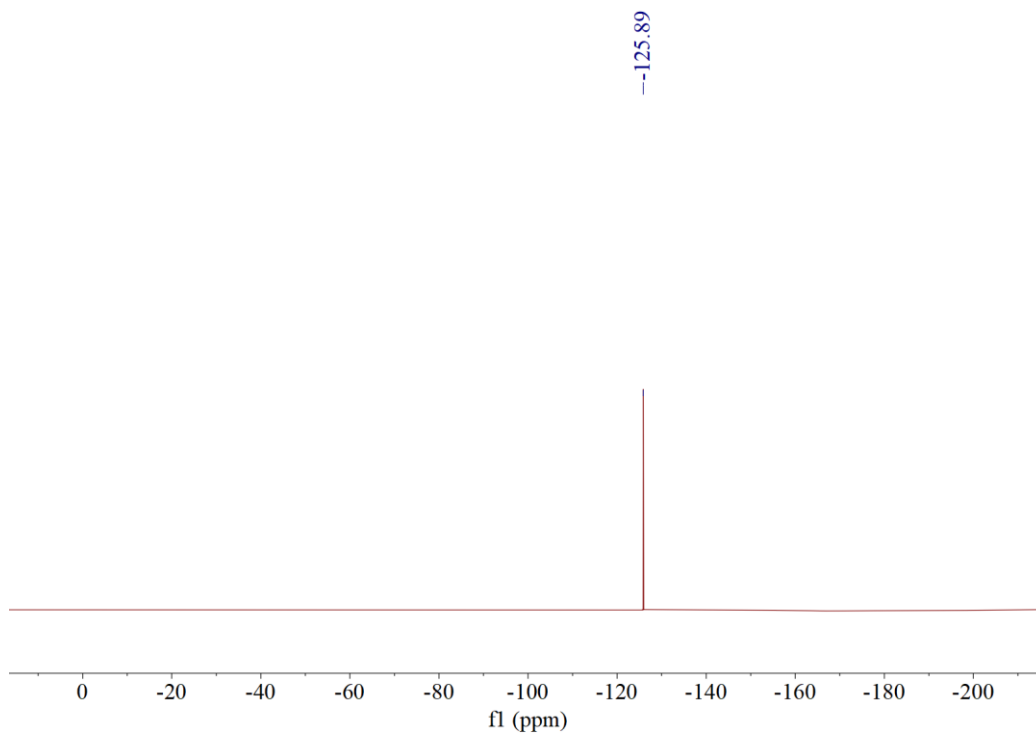

**Fig. S47.**  $^{19}\text{F}$  NMR spectrum of compound **3I**.

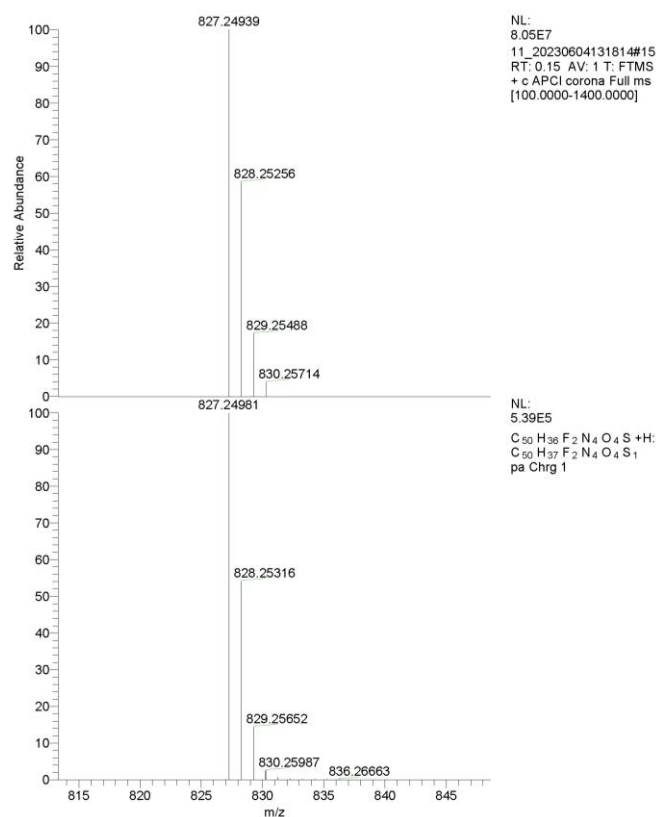

**Fig. S48.** HRMS spectrum of compound **3I**.

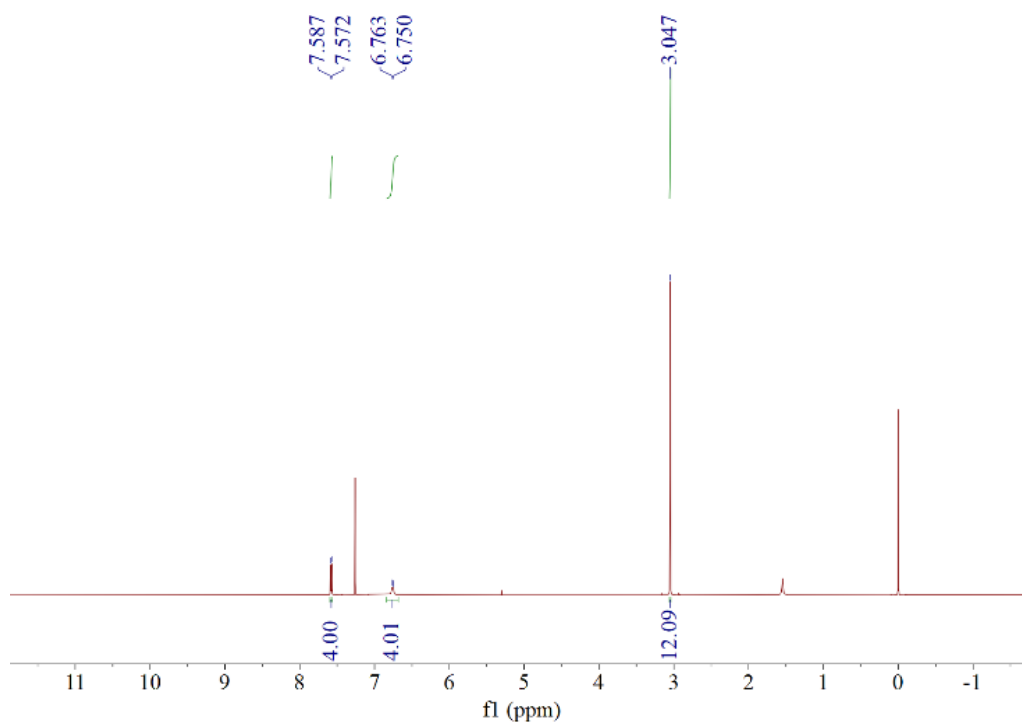

**Fig. S49.**  $^1\text{H}$  NMR spectrum of compound **3m**.

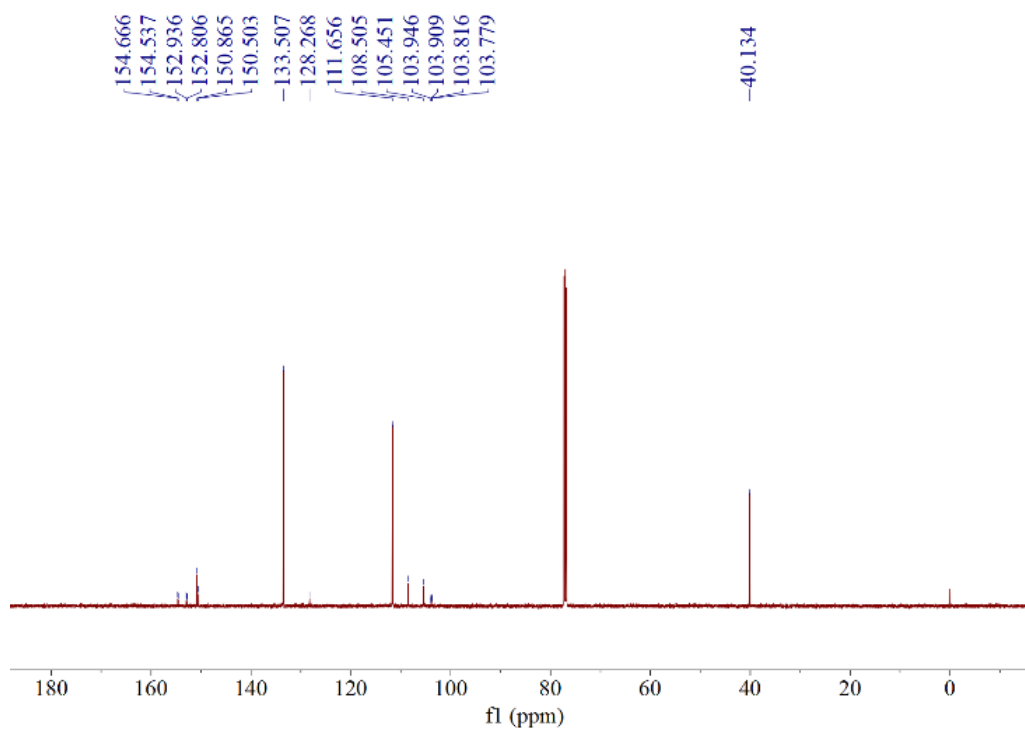

**Fig. S50.**  $^{13}\text{C}$  NMR spectrum of compound **3m**.

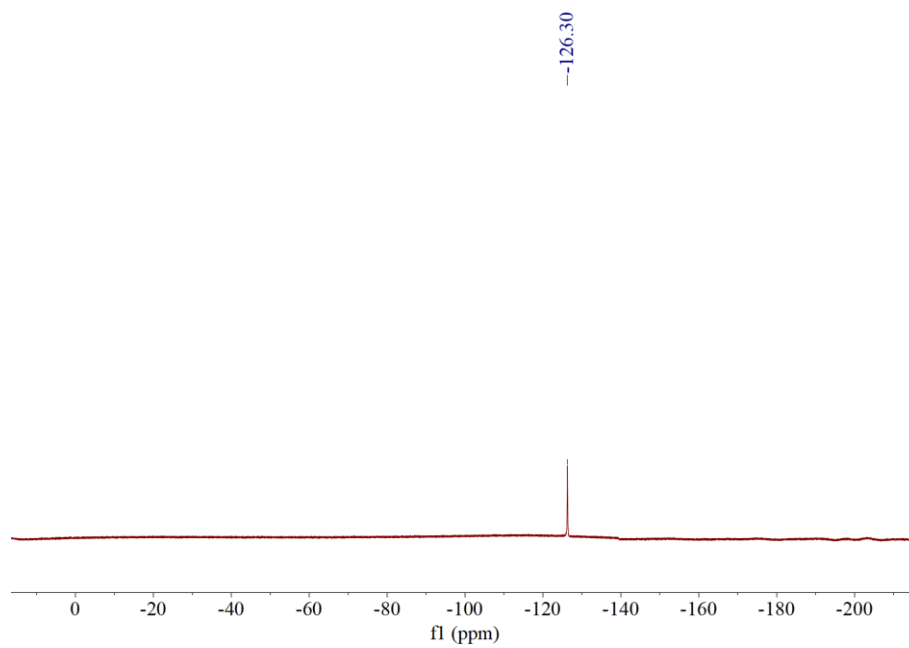

**Fig. S51.**  $^{19}\text{F}$  NMR spectrum of compound **3m**.

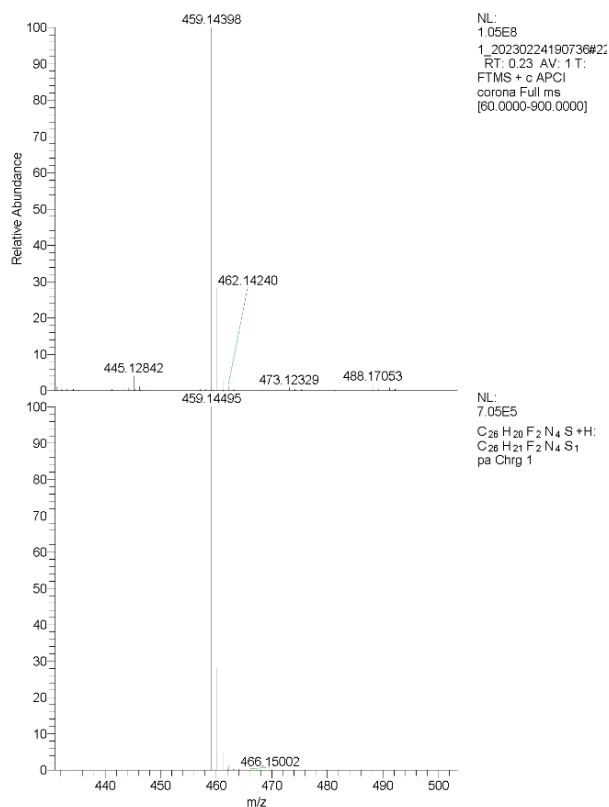

**Fig. S52.** HRMS spectrum of compound **3m**.

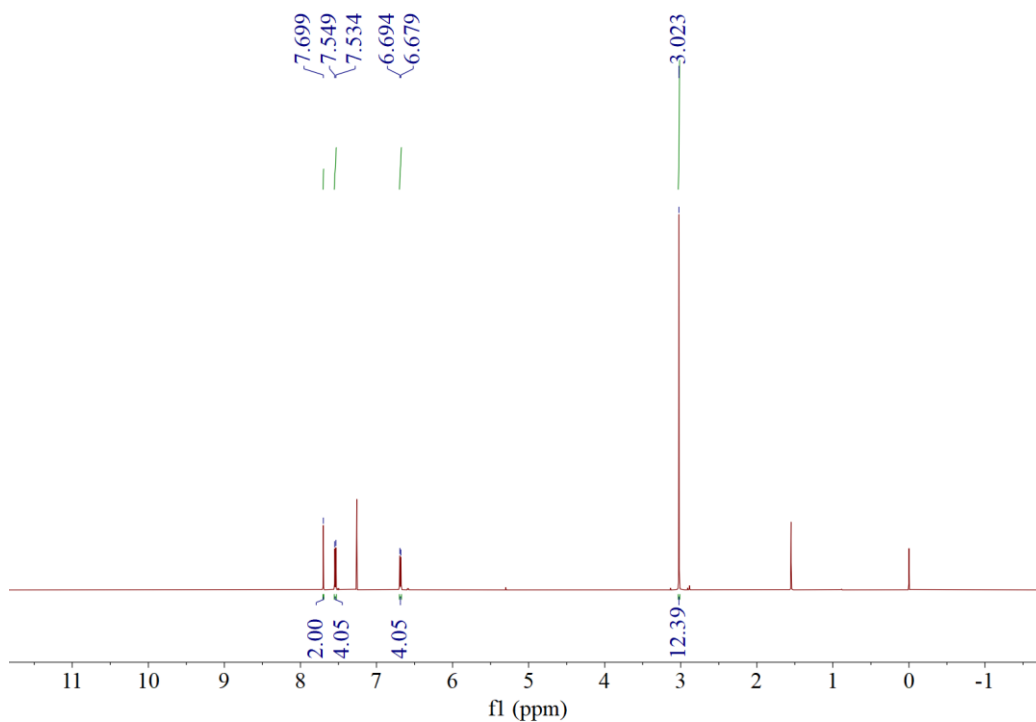

**Fig. S53.**  $^1\text{H}$  NMR spectrum of compound **3n**.

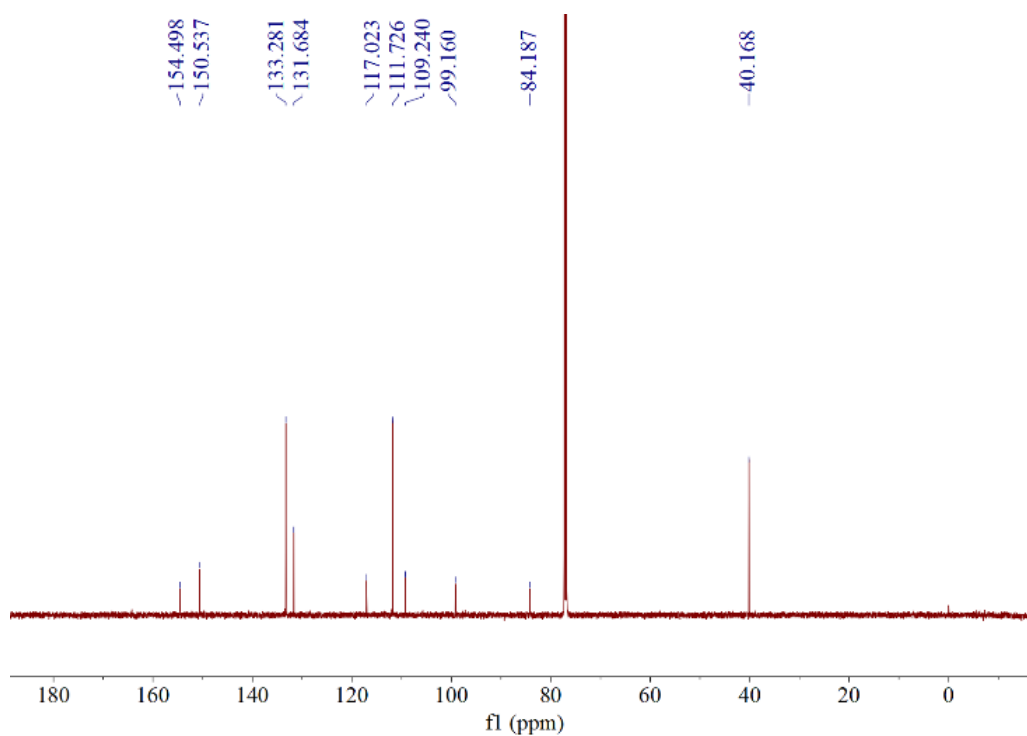

**Fig. S54.**  $^{13}\text{C}$  NMR spectrum of compound **3n**.

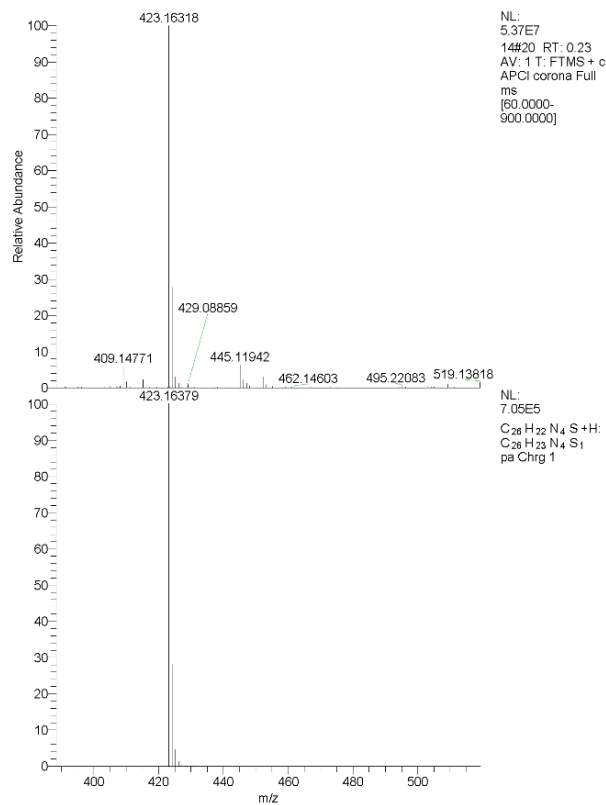

**Fig. S55.** HRMS spectrum of compound **3n**.

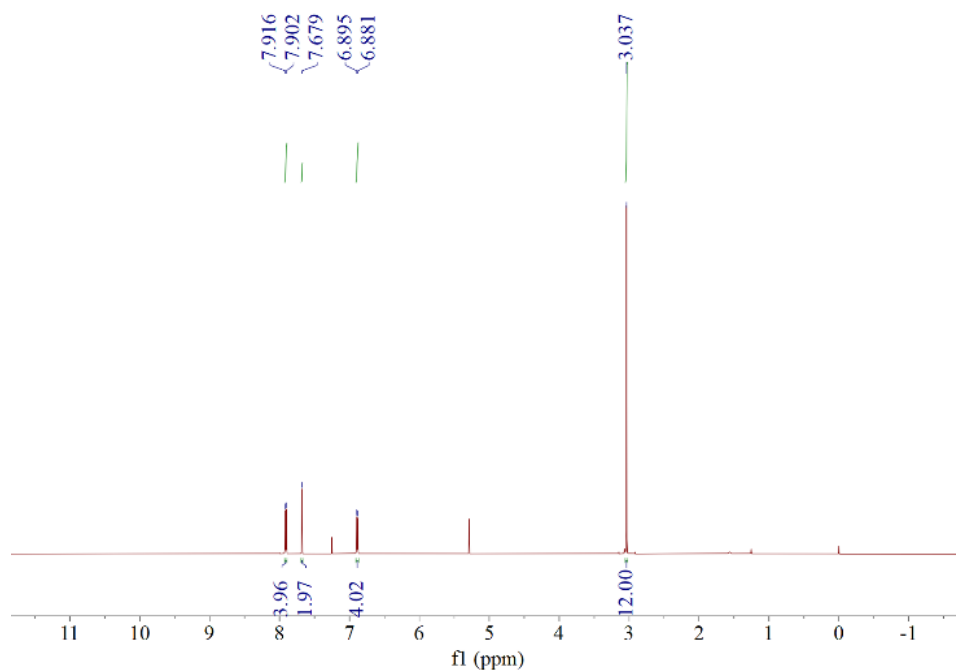

**Fig. S56.** <sup>1</sup>H NMR spectrum of compound **3o**.

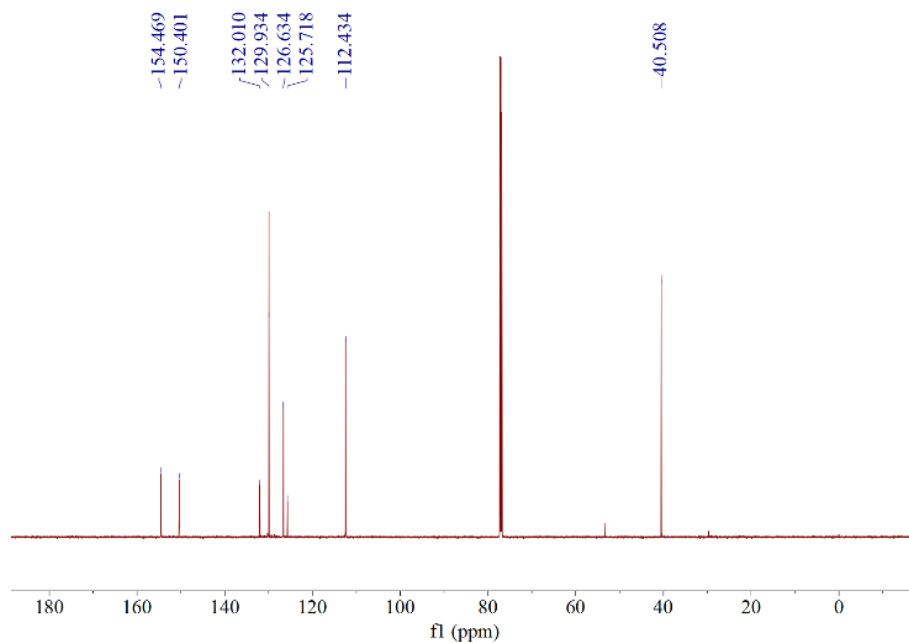

**Fig. S57.**  $^{13}\text{C}$  NMR spectrum of compound **30**.

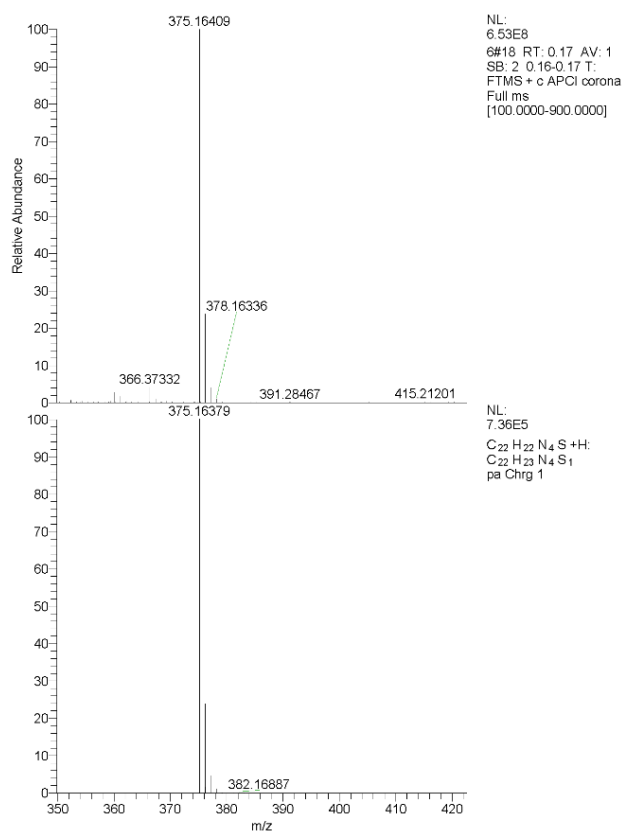

**Fig. S58.** HRMS spectrum of compound **30**.

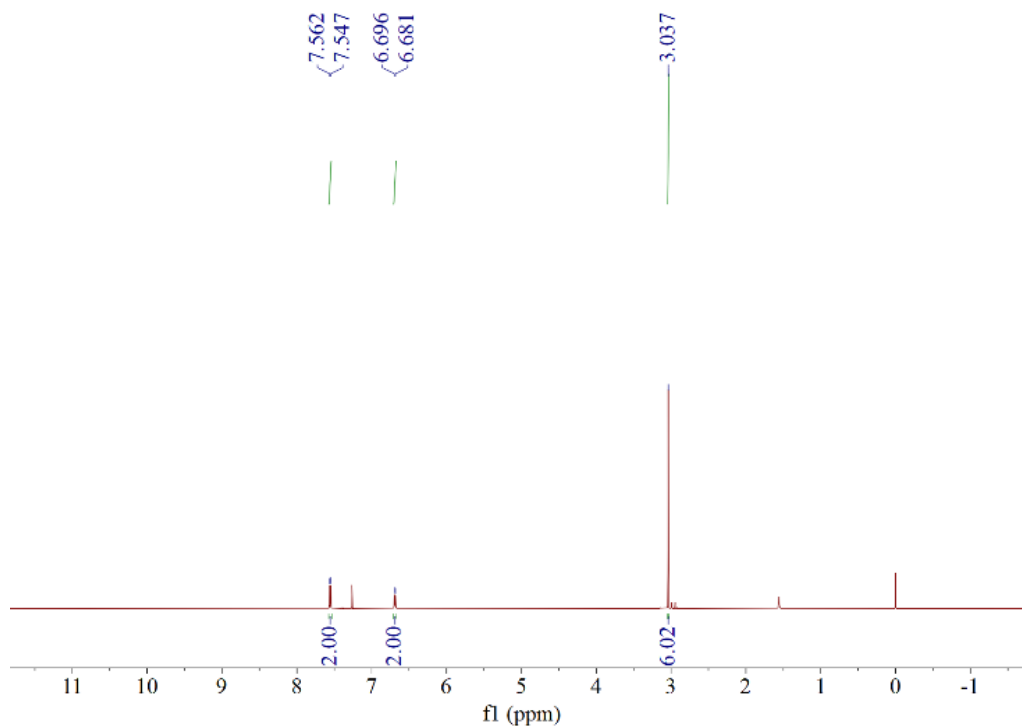

**Fig. S59.**  $^1\text{H}$  NMR spectrum of compound **3p**.

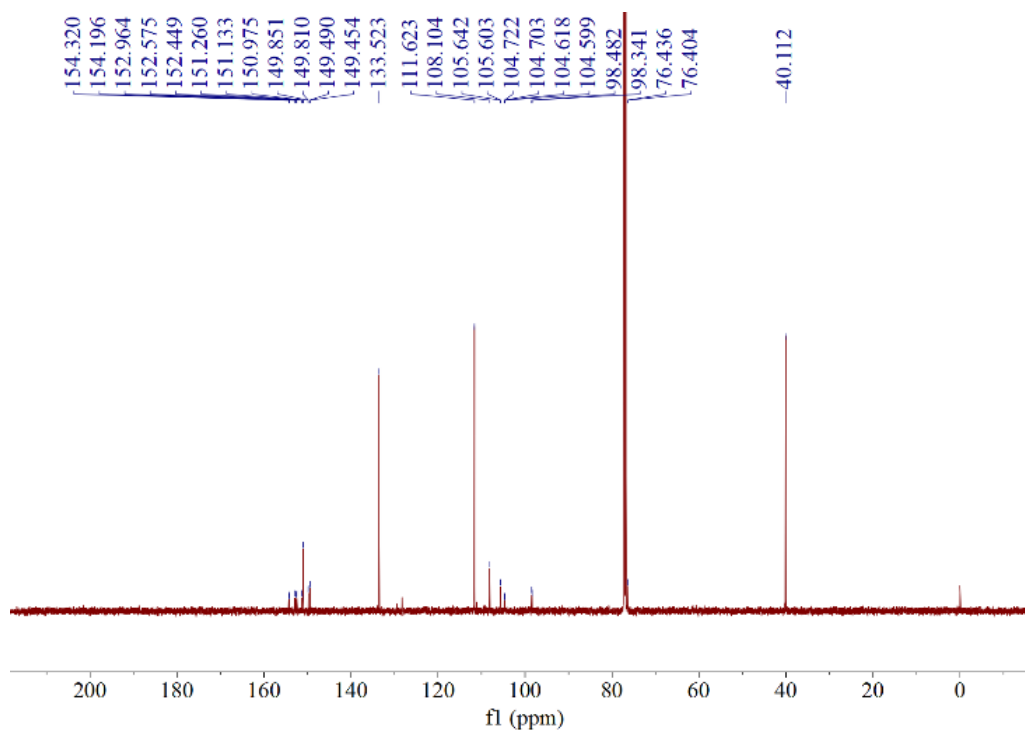

**Fig. S60.**  $^{13}\text{C}$  NMR spectrum of compound **3p**.



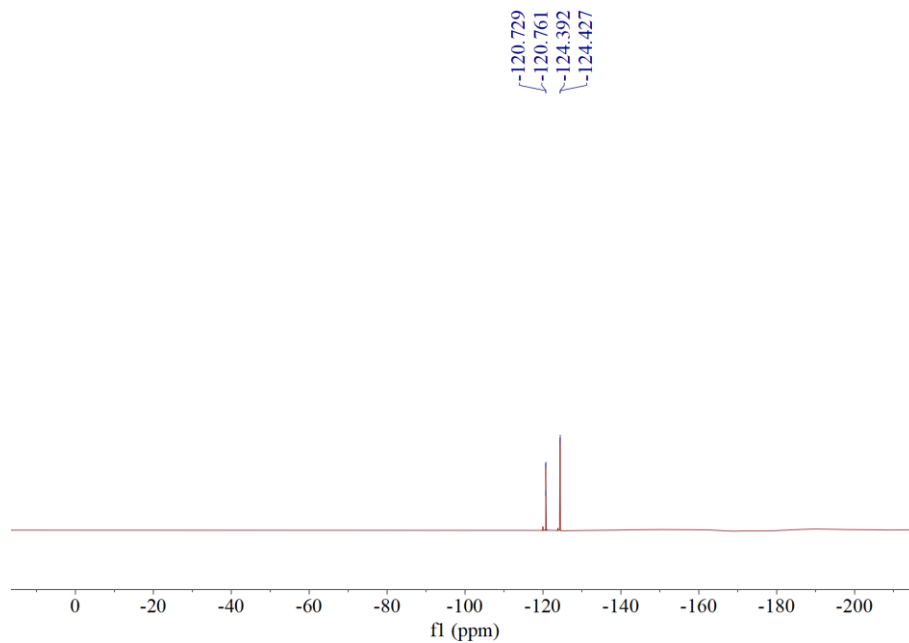

**Fig. S61.**  $^{19}\text{F}$  NMR spectrum of compound **3p**.

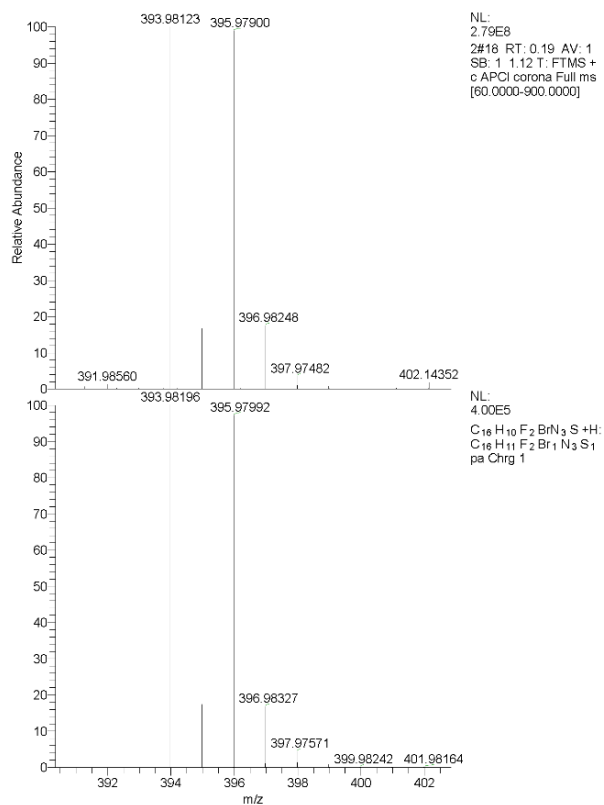

**Fig. S62.** HRMS spectrum of compound **3p**.

## 5. Single crystal data of compounds 3e, 3f, 3m and 3p

**Table S1.** Single crystal data of compound **3e**.

| Identification code               | <b>3e</b>                                                       |                   |
|-----------------------------------|-----------------------------------------------------------------|-------------------|
| Empirical formula                 | C <sub>24</sub> H <sub>14</sub> F <sub>2</sub> N <sub>2</sub> S |                   |
| Formula weight                    | 400.43                                                          |                   |
| Temperature/K                     | 297                                                             |                   |
| Crystal system                    | monoclinic                                                      |                   |
| Space group                       | P2 <sub>1</sub> /c                                              |                   |
| Unit cell dimensions              | a = 6.7170(11) Å                                                | α = 90 °          |
|                                   | b = 18.272(3) Å                                                 | β = 108.832(18) ° |
|                                   | c = 8.3004(14) Å                                                | γ = 90 °          |
| Volume                            | 964.2(3) Å <sup>3</sup>                                         |                   |
| Z                                 | 2                                                               |                   |
| ρ <sub>calc</sub>                 | 1.379 g/cm <sup>3</sup>                                         |                   |
| Absorption coefficient            | 0.199 mm <sup>-1</sup>                                          |                   |
| F(000)                            | 412.0                                                           |                   |
| Crystal size                      | 0.4 × 0.3 × 0.15 mm <sup>3</sup>                                |                   |
| Radiation                         | Mo Kα (λ = 0.71073)                                             |                   |
| 2θ range for data collection      | 7.176 to 49.998 °                                               |                   |
| Index ranges                      | -5 ≤ h ≤ 7, -21 ≤ k ≤ 18, -9 ≤ l ≤ 7                            |                   |
| Reflections collected             | 3746                                                            |                   |
| Independent reflections           | 1684 [R <sub>int</sub> = 0.0266, R <sub>sigma</sub> = 0.0429]   |                   |
| Data/restraints/parameters        | 1684/43/200                                                     |                   |
| Goodness-of-fit on F <sup>2</sup> | 1.131                                                           |                   |
| Final R indexes [I ≥ 2σ(I)]       | R <sub>1</sub> = 0.0595, wR <sub>2</sub> = 0.1162               |                   |
| Final R indexes [all data]        | R <sub>1</sub> = 0.1045, wR <sub>2</sub> = 0.1357               |                   |
| Largest diff. peak/hole           | 0.16/-0.15 e.Å <sup>-3</sup>                                    |                   |

**Table S2.** Single crystal data of compound **3f**.

| Identification code | <b>3f</b>                                                                      |  |
|---------------------|--------------------------------------------------------------------------------|--|
| Empirical formula   | C <sub>24</sub> H <sub>14</sub> F <sub>2</sub> N <sub>2</sub> O <sub>2</sub> S |  |
| Formula weight      | 432.43                                                                         |  |
| Temperature/K       | 297                                                                            |  |
| Crystal system      | monoclinic                                                                     |  |

|                                   |                                                                                                           |
|-----------------------------------|-----------------------------------------------------------------------------------------------------------|
| Space group                       | C2/c                                                                                                      |
| Unit cell dimensions              | a = 18.920(3) Å      α = 90 °<br>b = 12.160(2) Å      β = 102.902(17) °<br>c = 9.0331(17) Å      γ = 90 ° |
| Volume                            | 2025.8(6) Å <sup>3</sup>                                                                                  |
| Z                                 | 4                                                                                                         |
| ρ <sub>calc</sub>                 | 1.418 g/cm <sup>3</sup>                                                                                   |
| Absorption coefficient            | 0.202 mm <sup>-1</sup>                                                                                    |
| F(000)                            | 888.0                                                                                                     |
| Crystal size                      | 0.3 × 0.08 × 0.08 mm <sup>3</sup>                                                                         |
| Radiation                         | Mo Kα (λ = 0.71073)                                                                                       |
| 2θ range for data collection      | 7.428 to 50 °                                                                                             |
| Index ranges                      | -22 ≤ h ≤ 22, -14 ≤ k ≤ 10, -10 ≤ l ≤ 10                                                                  |
| Reflections collected             | 4643                                                                                                      |
| Independent reflections           | 1789 [R <sub>int</sub> = 0.0433, R <sub>sigma</sub> = 0.0632]                                             |
| Data/restraints/parameters        | 1789/0/142                                                                                                |
| Goodness-of-fit on F <sup>2</sup> | 1.022                                                                                                     |
| Final R indexes [I ≥ 2σ(I)]       | R <sub>1</sub> = 0.0594, wR <sub>2</sub> = 0.1163                                                         |
| Final R indexes [all data]        | R <sub>1</sub> = 0.0987, wR <sub>2</sub> = 0.1331                                                         |
| Largest diff. peak/hole           | 0.16/-0.28 e.Å <sup>-3</sup>                                                                              |

**Table S3.** Single crystal data of compound **3m**.

| Identification code          | <b>3m</b>                                                                                                |
|------------------------------|----------------------------------------------------------------------------------------------------------|
| Empirical formula            | C <sub>26</sub> H <sub>20</sub> F <sub>2</sub> N <sub>4</sub> S                                          |
| Formula weight               | 458.52                                                                                                   |
| Temperature/K                | 297                                                                                                      |
| Crystal system               | monoclinic                                                                                               |
| Space group                  | P2 <sub>1</sub> /n                                                                                       |
| Unit cell dimensions         | a = 7.7592(10) Å      α = 90 °<br>b = 15.080(2) Å      β = 93.781(11) °<br>c = 19.199(2) Å      γ = 90 ° |
| Volume                       | 2241.6(5) Å <sup>3</sup>                                                                                 |
| Z                            | 4                                                                                                        |
| ρ <sub>calc</sub>            | 1.359 g/cm <sup>3</sup>                                                                                  |
| Absorption coefficient       | 0.183 mm <sup>-1</sup>                                                                                   |
| F(000)                       | 952.0                                                                                                    |
| Crystal size                 | 0.08 × 0.03 × 0.09 mm <sup>3</sup>                                                                       |
| Radiation                    | Mo Kα (λ = 0.71073)                                                                                      |
| 2θ range for data collection | 7.082 to 58.978 °                                                                                        |
| Index ranges                 | -10 ≤ h ≤ 10, -13 ≤ k ≤ 20, -16 ≤ l ≤ 24                                                                 |

|                                         |                                                                  |
|-----------------------------------------|------------------------------------------------------------------|
| Reflections collected                   | 12199                                                            |
| Independent reflections                 | 5194 [ $R_{\text{int}} = 0.0399$ , $R_{\text{sigma}} = 0.0656$ ] |
| Data/restraints/parameters              | 5194/114/312                                                     |
| Goodness-of-fit on $F^2$                | 1.098                                                            |
| Final R indexes [ $I \geq 2\sigma(I)$ ] | $R_1 = 0.0749$ , $wR_2 = 0.1267$                                 |
| Final R indexes [all data]              | $R_1 = 0.1415$ , $wR_2 = 0.1552$                                 |
| Largest diff. peak/hole                 | 0.18/-0.21 e. $\text{\AA}^{-3}$                                  |

**Table S4.** Single crystal data of compound **3p**.

| Identification code                     | <b>3p</b>                                                                                    |                                                                                         |
|-----------------------------------------|----------------------------------------------------------------------------------------------|-----------------------------------------------------------------------------------------|
| Empirical formula                       | $\text{C}_{16}\text{H}_{10.16}\text{Br}_{0.84}\text{F}_2\text{N}_3\text{S}$                  |                                                                                         |
| Formula weight                          | 381.62                                                                                       |                                                                                         |
| Temperature/K                           | 297                                                                                          |                                                                                         |
| Crystal system                          | triclinic                                                                                    |                                                                                         |
| Space group                             | P-1                                                                                          |                                                                                         |
| Unit cell dimensions                    | $a = 7.0240(8) \text{ \AA}$<br>$b = 10.3191(9) \text{ \AA}$<br>$c = 11.3416(14) \text{ \AA}$ | $\alpha = 90.378(9)^\circ$<br>$\beta = 105.741(10)^\circ$<br>$\gamma = 98.561(8)^\circ$ |
| Volume                                  | $781.46(15) \text{ \AA}^3$                                                                   |                                                                                         |
| Z                                       | 2                                                                                            |                                                                                         |
| $\rho_{\text{calc}}$                    | $1.622 \text{ g/cm}^3$                                                                       |                                                                                         |
| Absorption coefficient                  | $2.376 \text{ mm}^{-1}$                                                                      |                                                                                         |
| F(000)                                  | 381.0                                                                                        |                                                                                         |
| Crystal size                            | $0.2 \times 0.2 \times 0.1 \text{ mm}^3$                                                     |                                                                                         |
| Radiation                               | Mo $K\alpha$ ( $\lambda = 0.71073$ )                                                         |                                                                                         |
| $2\theta$ range for data collection     | $6.752$ to $49.998^\circ$                                                                    |                                                                                         |
| Index ranges                            | $-8 \leq h \leq 8$ , $-12 \leq k \leq 11$ , $-13 \leq l \leq 13$                             |                                                                                         |
| Reflections collected                   | 5693                                                                                         |                                                                                         |
| Independent reflections                 | 2757 [ $R_{\text{int}} = 0.0433$ , $R_{\text{sigma}} = 0.0632$ ]                             |                                                                                         |
| Data/restraints/parameters              | 2757/0/211                                                                                   |                                                                                         |
| Goodness-of-fit on $F^2$                | 1.081                                                                                        |                                                                                         |
| Final R indexes [ $I \geq 2\sigma(I)$ ] | $R_1 = 0.0515$ , $wR_2 = 0.0904$                                                             |                                                                                         |
| Final R indexes [all data]              | $R_1 = 0.0823$ , $wR_2 = 0.1000$                                                             |                                                                                         |
| Largest diff. peak/hole                 | 0.28/-0.35 e. $\text{\AA}^{-3}$                                                              |                                                                                         |

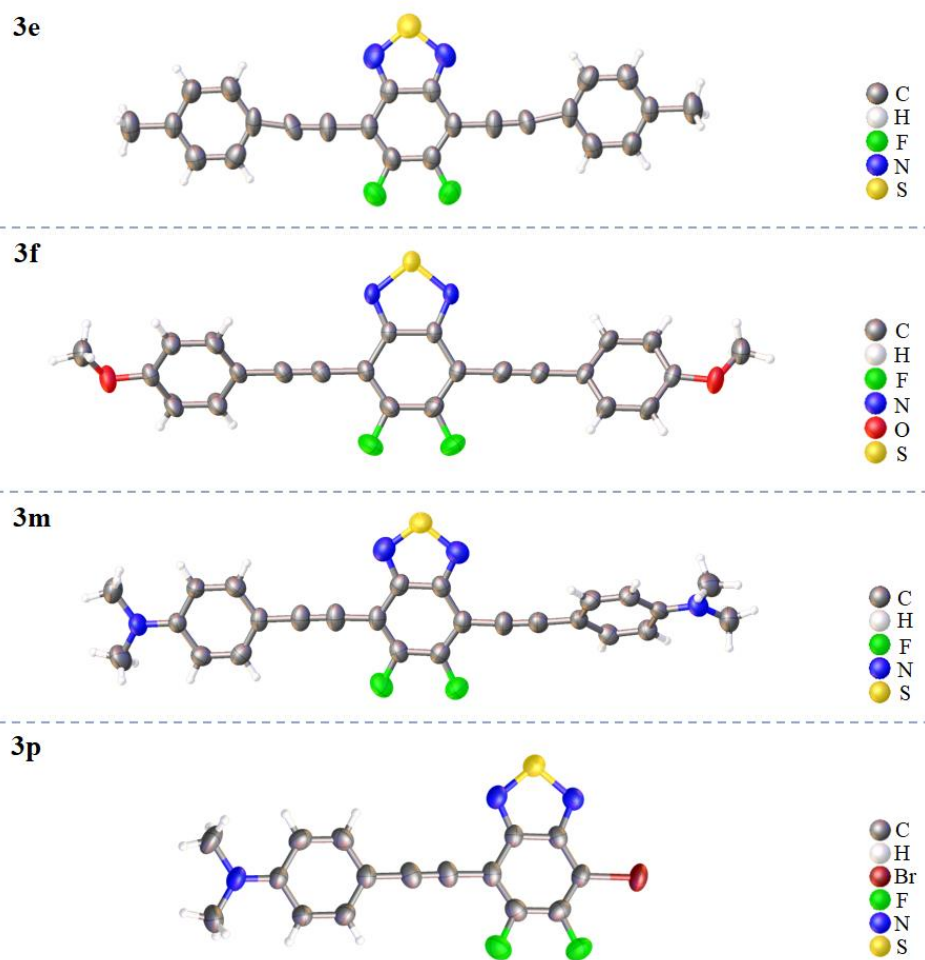

**Fig. S63.** Crystal structures of compound **3e**, **3f**, **3m** and **3p** (CCDC: 2282710, 2282714, 2282717, 2282718).

## 6. Thermogravimetric analyses of compounds 3a-3p

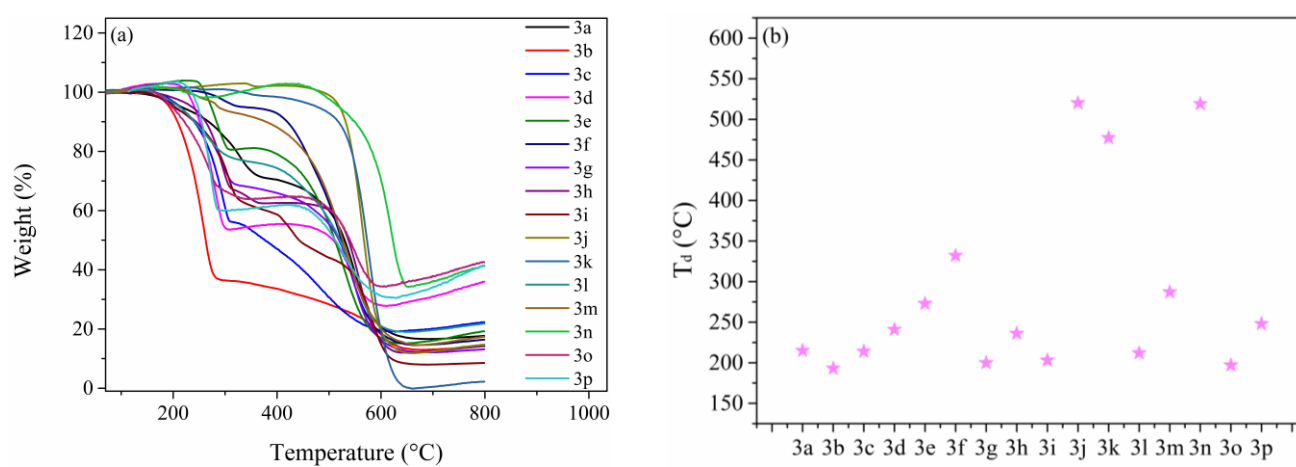

**Fig. S64.** (a) The thermogravimetric analyses (TGA) diagrams and (b) thermal decomposition temperature of compounds **3a-3p** at a heating rate of 10 °C/min in air atmosphere.

## 7. Fluorescent lifetime of compounds 3a-3p

**Table S5.** The fluorescence lifetime data of compounds **3a-3p**.

| Compound  | $\tau_1$ | Rel <sub>1</sub> % | $\tau_2$ | Rel <sub>2</sub> % | $\tau^a$ |
|-----------|----------|--------------------|----------|--------------------|----------|
| <b>3a</b> | 1.4198   | 86.55%             | 6.4488   | 13.45%             | 2.10     |
| <b>3b</b> | 1.8463   | 49.84%             | 4.3634   | 50.16%             | 3.11     |
| <b>3c</b> | 1.6426   | 55.52%             | 4.4814   | 44.48%             | 2.91     |
| <b>3d</b> | 2.4471   | 12.51%             | 6.7837   | 87.49%             | 6.24     |
| <b>3e</b> | 2.5736   | 63.47%             | 5.0303   | 36.53%             | 3.47     |
| <b>3f</b> | 1.6476   | 67.61%             | 4.103    | 32.39%             | 2.44     |
| <b>3g</b> | 2.4676   | 10.44%             | 3.9959   | 89.56%             | 3.84     |
| <b>3h</b> | 1.8551   | 64.09%             | 4.8718   | 35.91%             | 2.94     |
| <b>3i</b> | 1.5362   | 76.94%             | 4.9953   | 23.06%             | 2.33     |
| <b>3j</b> | 3.4046   | 76.34%             | 10.6215  | 23.66%             | 5.11     |
| <b>3k</b> | 1.4029   | 55.95%             | 3.001    | 44.05%             | 2.11     |
| <b>3l</b> | 1.1121   | 65.12%             | 3.9692   | 34.88%             | 2.11     |
| <b>3m</b> | 1.2798   | 52.34%             | 2.8227   | 47.66%             | 2.02     |
| <b>3n</b> | 0.823    | 85.96%             | 2.4159   | 14.04%             | 1.05     |
| <b>3o</b> | 1.4621   | 38.75%             | 2.4094   | 61.25%             | 2.04     |
| <b>3p</b> | 0.7513   | 44.62%             | 2.0322   | 55.38%             | 1.46     |

<sup>a</sup> Fluorescence lifetime is obtained by double exponential fitting.  $\tau = \tau_1 \times \text{Rel}_1 \% + \tau_2 \times \text{Rel}_2 \%$ .

## 8. Fluorescence spectra of 3a-3p in different states

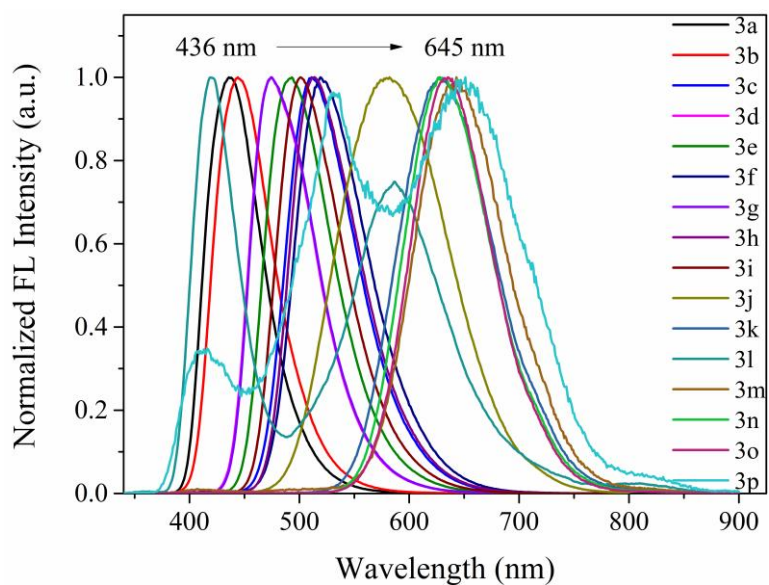

**Fig. S65.** The normalized emission spectra of compounds **3a-3p** in THF ( $10^{-5}$  M).

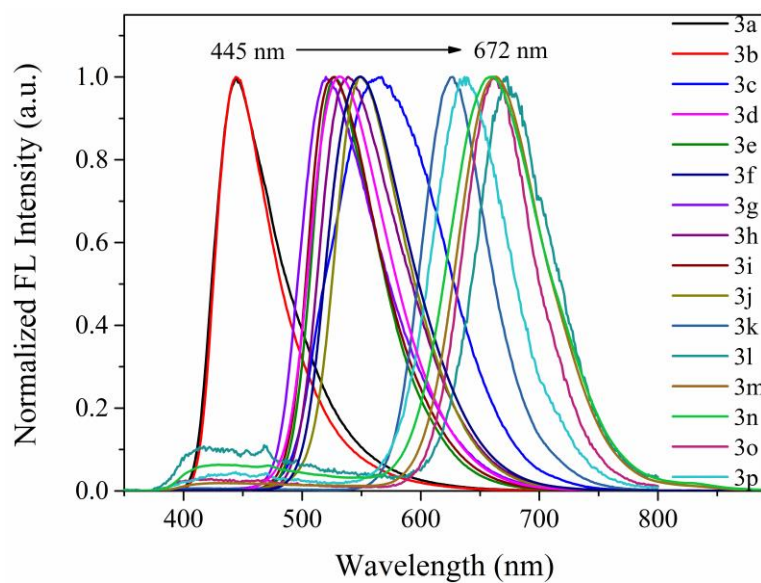

**Fig. S66.** The normalized emission spectra of compounds **3a-3p** in solid state.



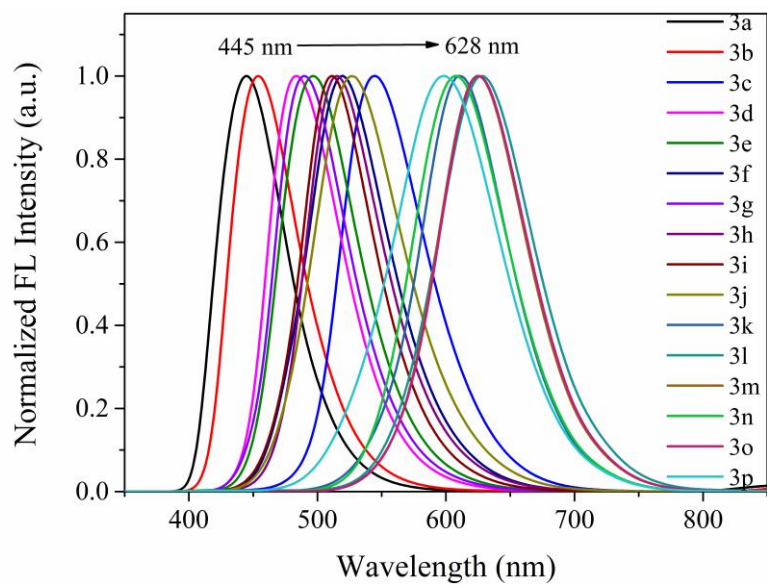

**Fig. S67.** The normalized emission spectra of compounds **3a-3p** in film state.

## 9. Fluorescence spectra of compounds 3a-3p in various solvents

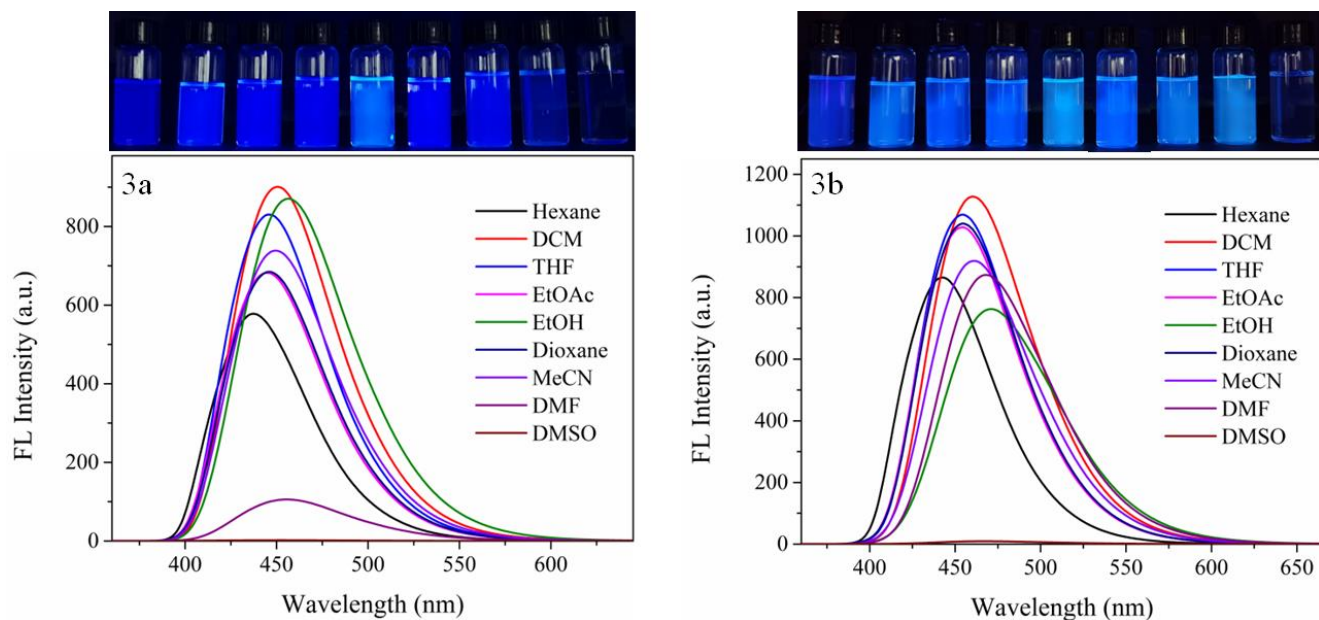

**Fig. S68.** Fluorescence spectra and representative images (under 365 nm irradiation) of compounds **3a** and **3b** ( $10^{-5}$  M) in solvents of different polarities.

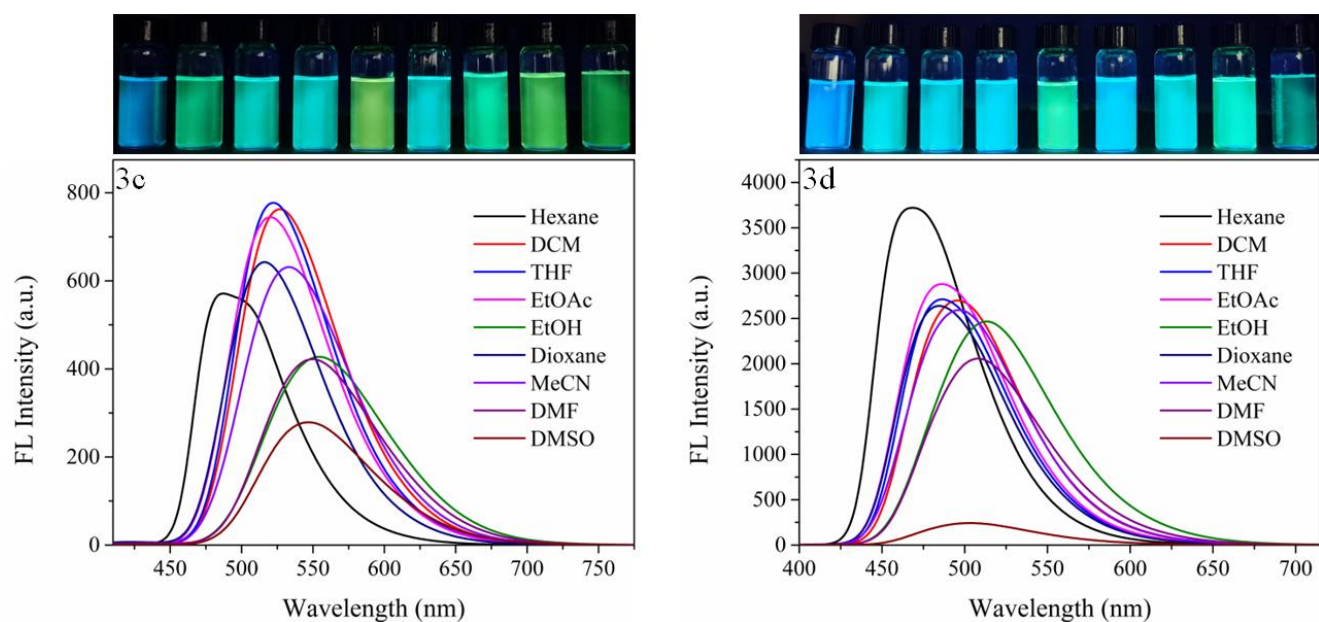

**Fig. S69.** Fluorescence spectra and representative images (under 365 nm irradiation) of compounds **3c** and **3d** ( $10^{-5}$  M) in solvents of different polarities.

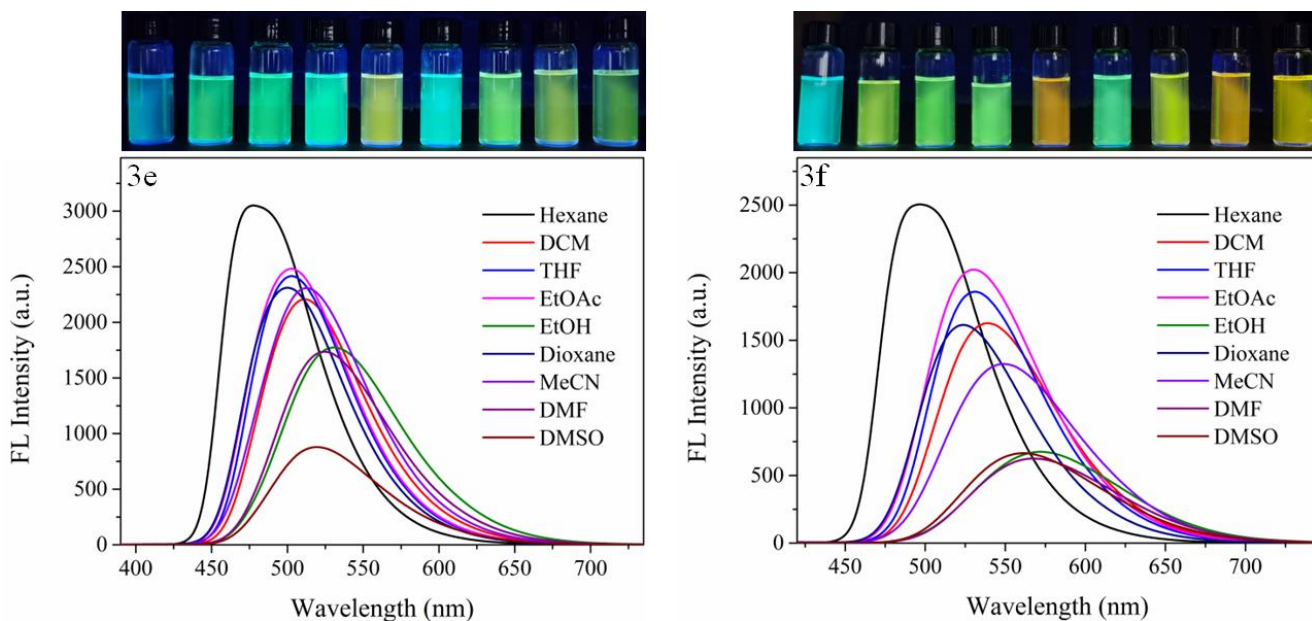

**Fig. S70.** Fluorescence spectra and representative images (under 365 nm irradiation) of compounds **3e** and **3f** ( $10^{-5}$  M) in solvents of different polarities.

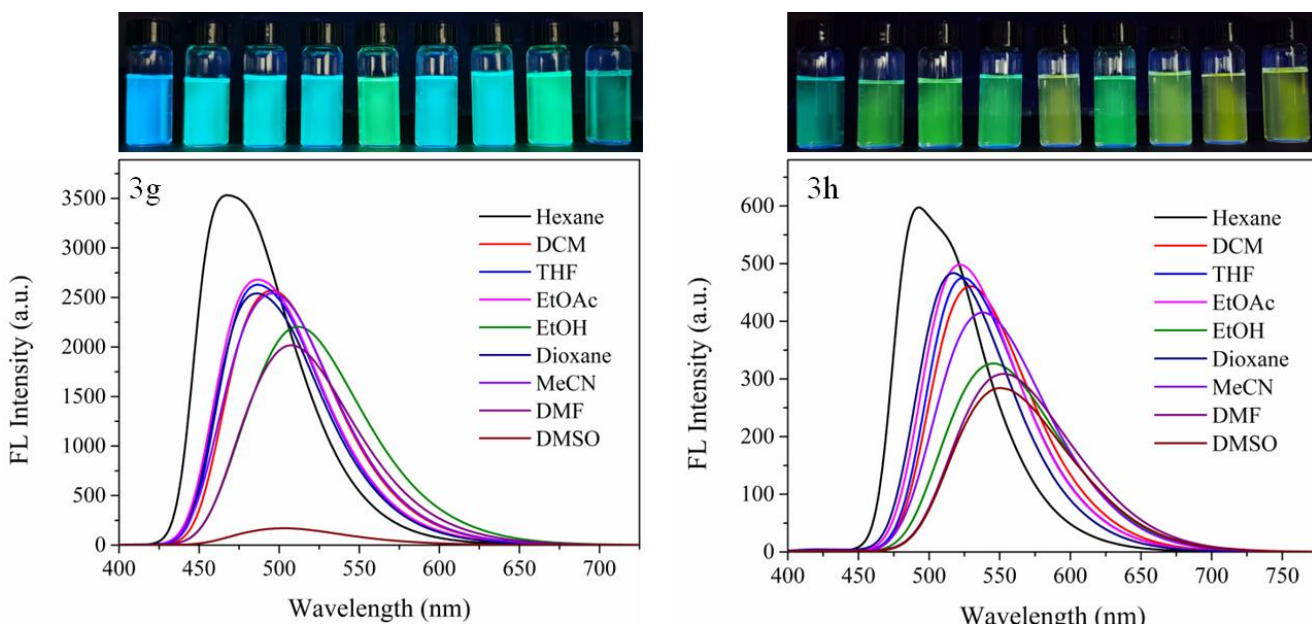

**Fig. S71.** Fluorescence spectra and representative images (under 365 nm irradiation) of compounds **3g** and **3h** ( $10^{-5}$  M) in solvents of different polarities.

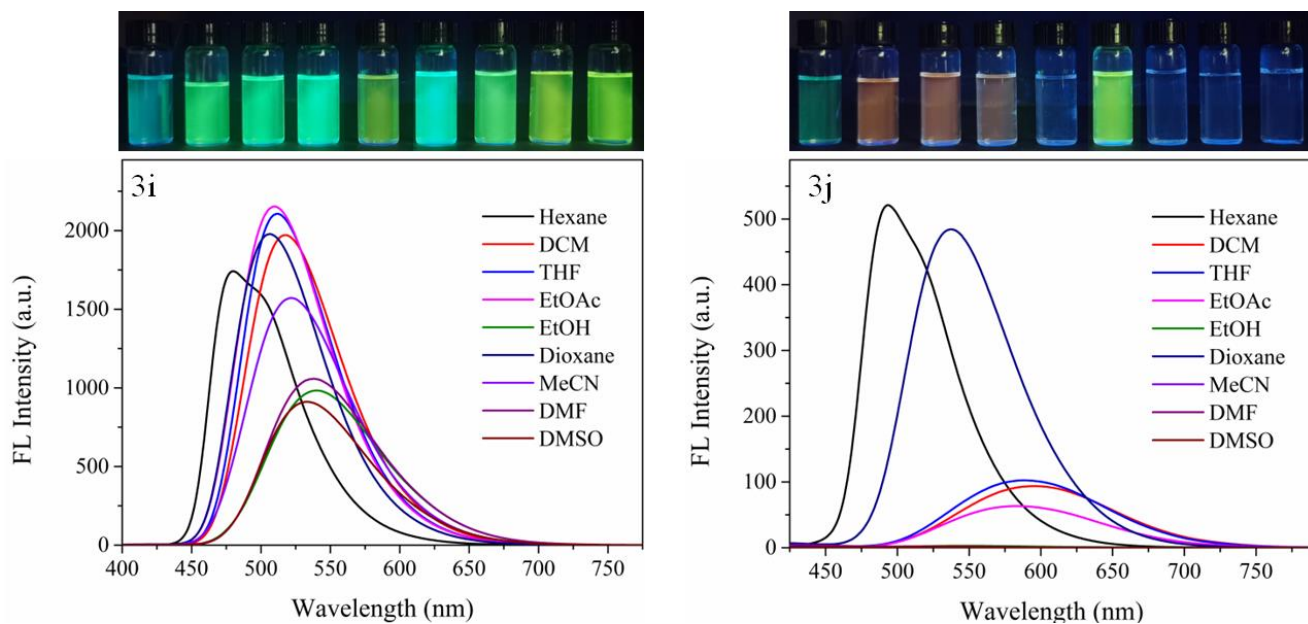

**Fig. S72.** Fluorescence spectra and representative images (under 365 nm irradiation) of compounds **3i** and **3j** ( $10^{-5}$  M) in solvents of different polarities.

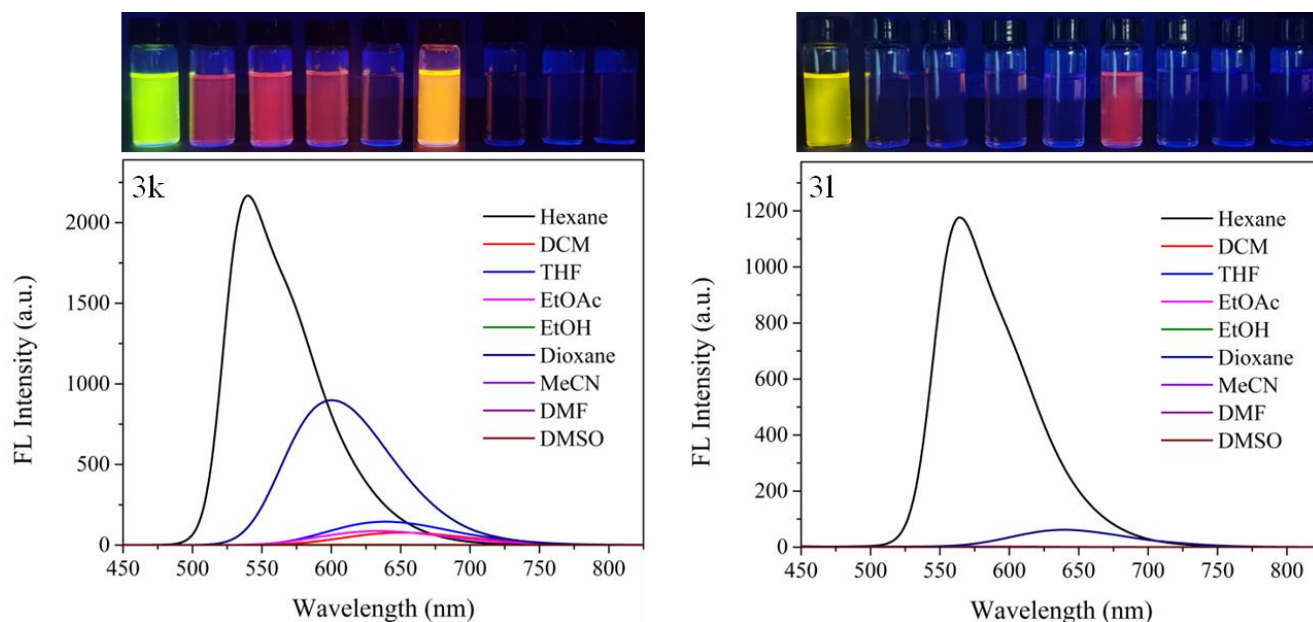

**Fig. S73.** Fluorescence spectra and representative images (under 365 nm irradiation) of compounds **3k** and **3l** ( $10^{-5}$  M) in solvents of different polarities.

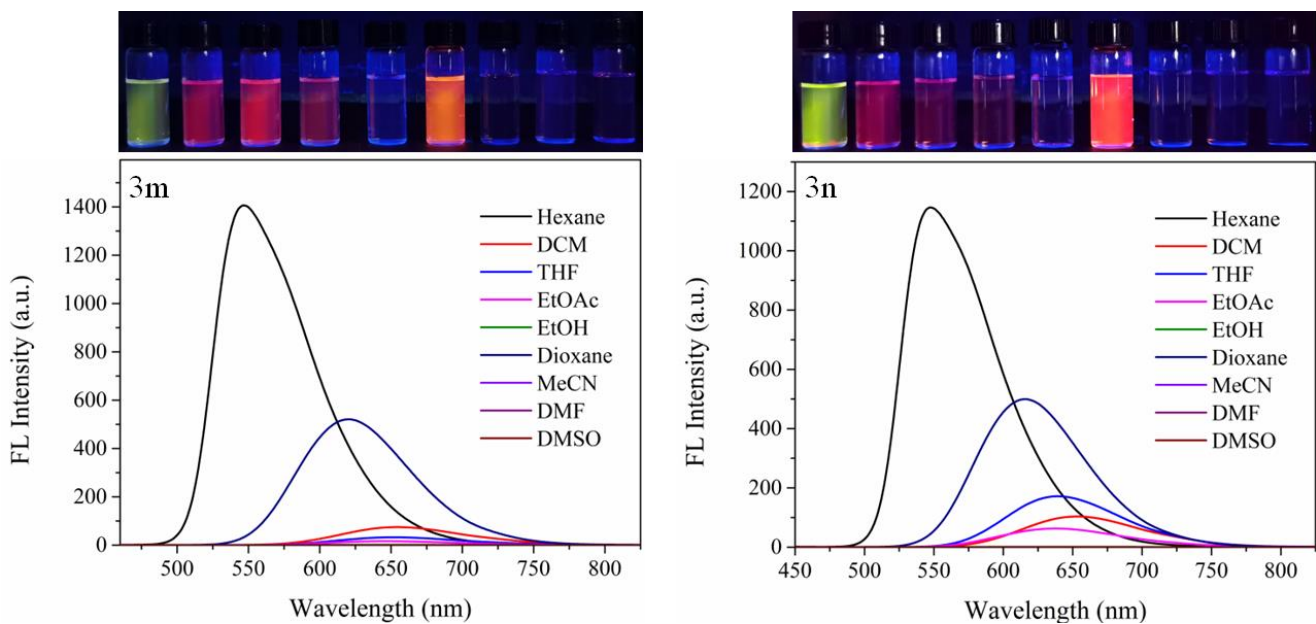

**Fig. S74.** Fluorescence spectra and representative images (under 365 nm irradiation) of compounds **3m** and **3n** ( $10^{-5}$  M) in solvents of different polarities.

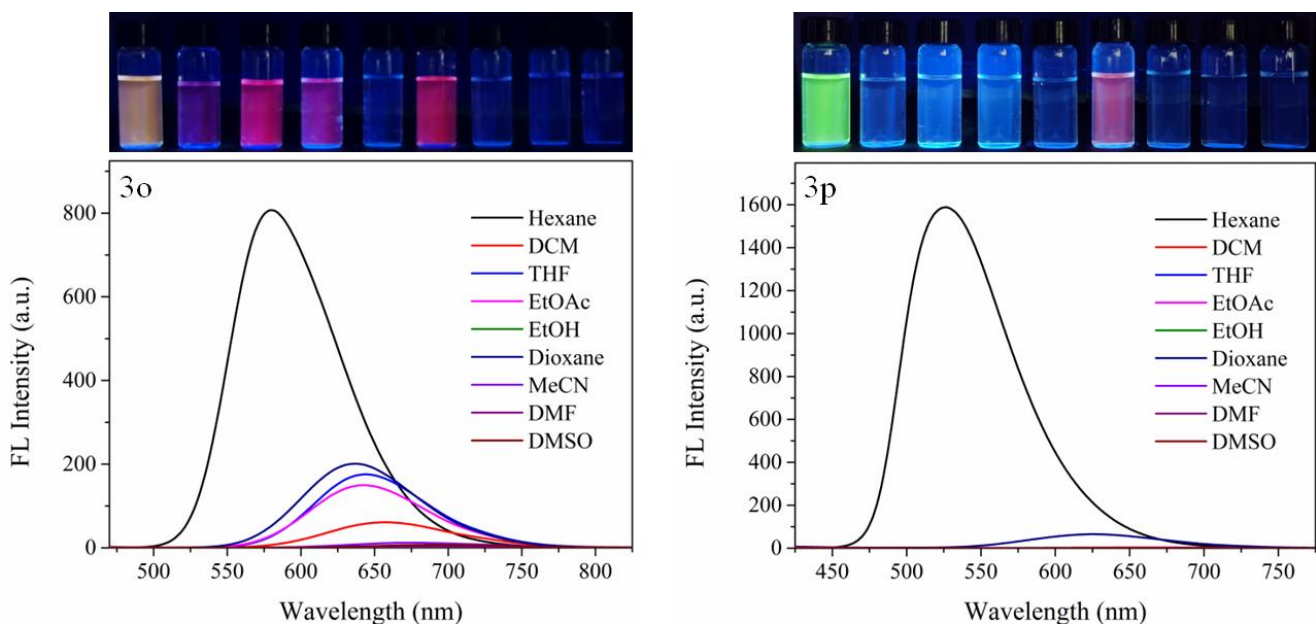

**Fig. S75.** Fluorescence spectra and representative images (under 365 nm irradiation) of compounds **3o** and **3p** ( $10^{-5}$  M) in solvents of different polarities.

**Table S6.** Polarity data for common organic solvents.

| Solvent                       | Abbreviation of solvent name | Polarity |
|-------------------------------|------------------------------|----------|
| <i>n</i> -Hexane              | Hexane                       | 0.06     |
| Dichloromethane               | DCM                          | 3.4      |
| Tetrahydrofuran               | THF                          | 4.2      |
| Ethyl acetate                 | EtOAc                        | 4.3      |
| Ethanol                       | EtOH                         | 4.3      |
| 1,4-Dioxane                   | Dioxane                      | 4.8      |
| Acetonitrile                  | MeCN                         | 6.2      |
| <i>N,N</i> -Dimethylformamide | DMF                          | 6.4      |
| Dimethyl sulfoxide            | DMSO                         | 7.2      |

**Table S7.** The maximum emission peak of **3a-3p** ( $10^{-5}$  M) in solvents of different polarities.

| Sol. Comp.                | <b>3a</b> | <b>3b</b> | <b>3c</b> | <b>3d</b> | <b>3e</b> | <b>3f</b> | <b>3g</b> | <b>3h</b> | <b>3i</b> | <b>3j</b> | <b>3k</b> | <b>3l</b> | <b>3m</b> | <b>3n</b> | <b>3o</b> | <b>3p</b> |
|---------------------------|-----------|-----------|-----------|-----------|-----------|-----------|-----------|-----------|-----------|-----------|-----------|-----------|-----------|-----------|-----------|-----------|
| Hexane                    | 437       | 443       | 487       | 469       | 478       | 497       | 468       | 493       | 480       | 493       | 540       | 564       | 547       | 548       | 580       | 526       |
| DCM                       | 451       | 460       | 527       | 496       | 512       | 539       | 496       | 529       | 518       | 596       | 651       | -         | 655       | 654       | 656       | 661       |
| THF                       | 436       | 444       | 511       | 475       | 493       | 519       | 474       | 514       | 501       | 582       | 628       | 569       | 643       | 630       | 635       | -         |
| EtOAc                     | 445       | 454       | 520       | 486       | 503       | 530       | 487       | 521       | 510       | 583       | 634       | 572       | 646       | 639       | 642       | -         |
| EtOH                      | 456       | 471       | 555       | 514       | 531       | 573       | 512       | 546       | 540       | 547       | 627       | -         | -         | -         | -         | -         |
| Dioxane                   | 446       | 455       | 516       | 484       | 500       | 524       | 486       | 517       | 507       | 537       | 600       | 639       | 620       | 616       | 637       | 626       |
| MeCN                      | 449       | 461       | 533       | 496       | 513       | 549       | 497       | 538       | 522       | 541       | -         | -         | -         | -         | -         | -         |
| DMF                       | 455       | 468       | 550       | 508       | 524       | 568       | 508       | 552       | 538       | -         | -         | -         | -         | -         | -         | -         |
| DMSO                      | 452       | 467       | 547       | 504       | 519       | 562       | 502       | 550       | 533       | -         | -         | -         | -         | -         | -         | -         |
| Red shift                 | 19        | 28        | 68        | 45        | 53        | 71        | 44        | 59        | 58        | 103       | 111       | 75        | 108       | 106       | 76        | 135       |
| DM( $10^2$ ) <sup>a</sup> | 47        | 76        | 51        | 47        | 46        | 40        | 57        | 40        | 46        | 84        | 38        | 27        | 1         | 226       | 227       | 890       |

<sup>a</sup> Dipole moment obtained by theoretical calculation.

## 10. Fluorescent behaviors of 3a-3p in solution and aggregation states

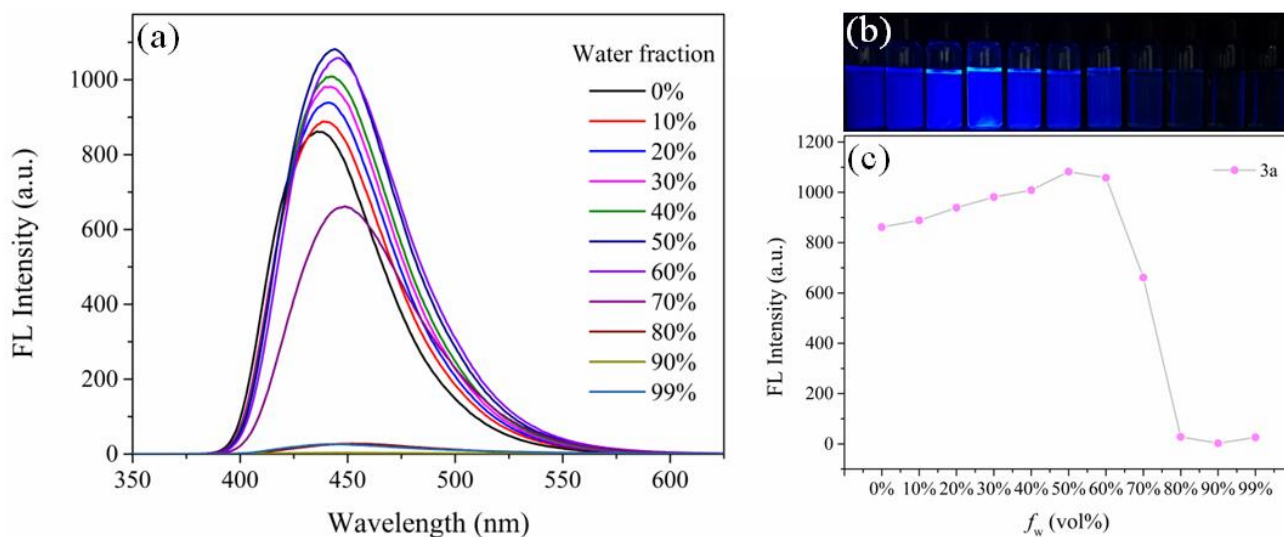

**Fig. S76.** (a) The fluorescence spectra and (b) photos of compound **3a** ( $10^{-5}$  M) and (c) plot of maximum emission intensity versus water fraction ( $f_w$ ) in THF/H<sub>2</sub>O mixtures.

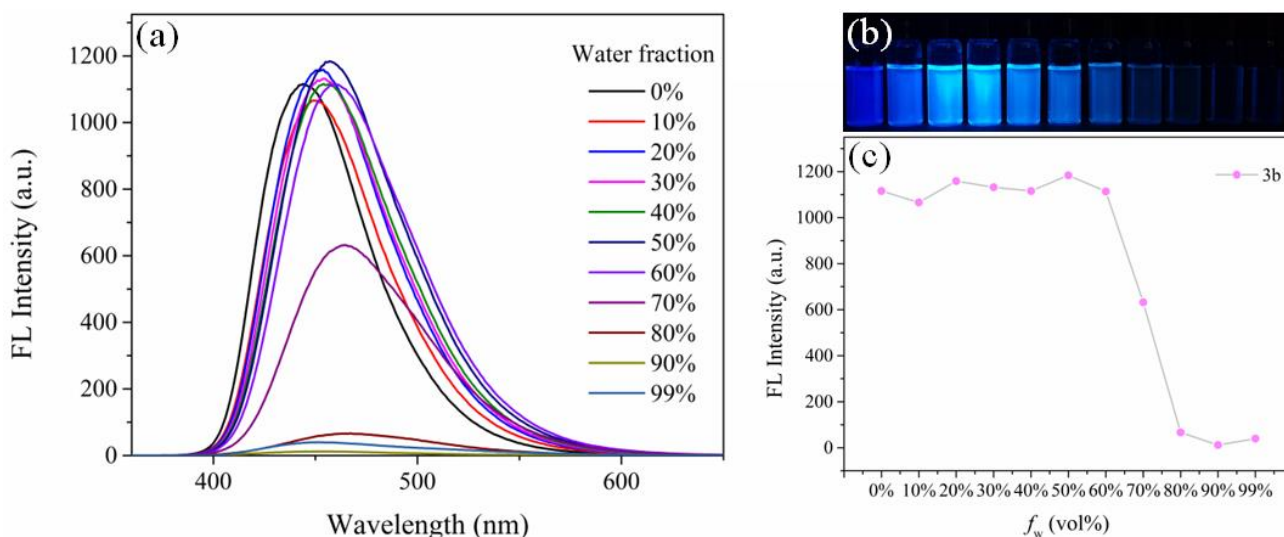

**Fig. S77.** (a) The fluorescence spectra and (b) photos of compound **3b** ( $10^{-5}$  M) and (c) plot of maximum emission intensity versus water fraction ( $f_w$ ) in THF/H<sub>2</sub>O mixtures.

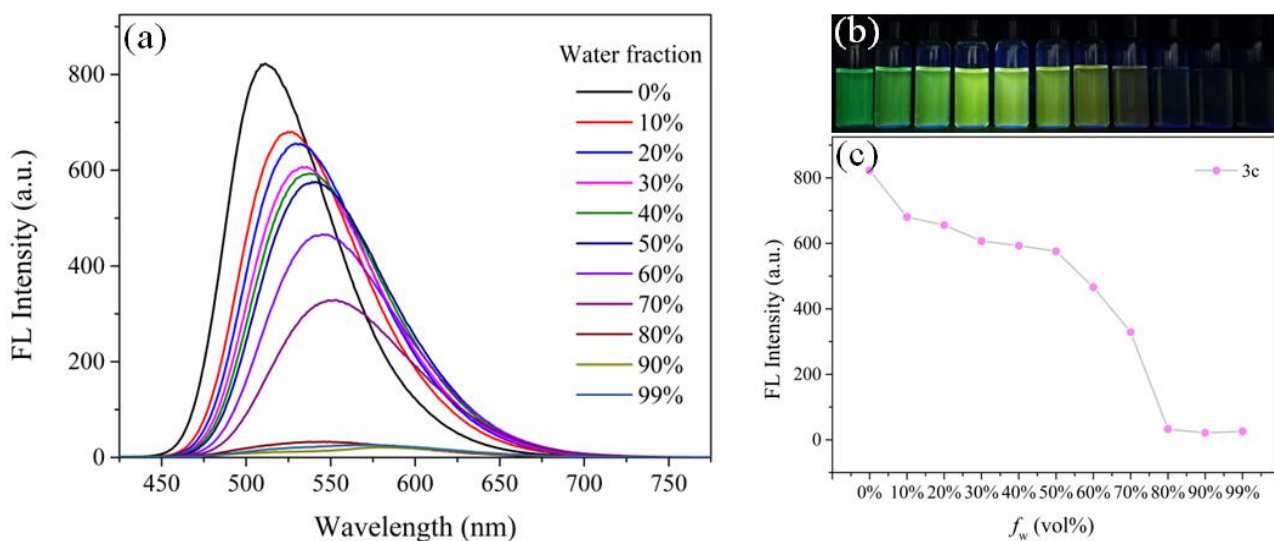

**Fig. S78.** (a) The fluorescence spectra and (b) photos of compound **3c** ( $10^{-5}$  M) and (c) plot of maximum emission intensity versus water fraction ( $f_w$ ) in THF/H<sub>2</sub>O mixtures.

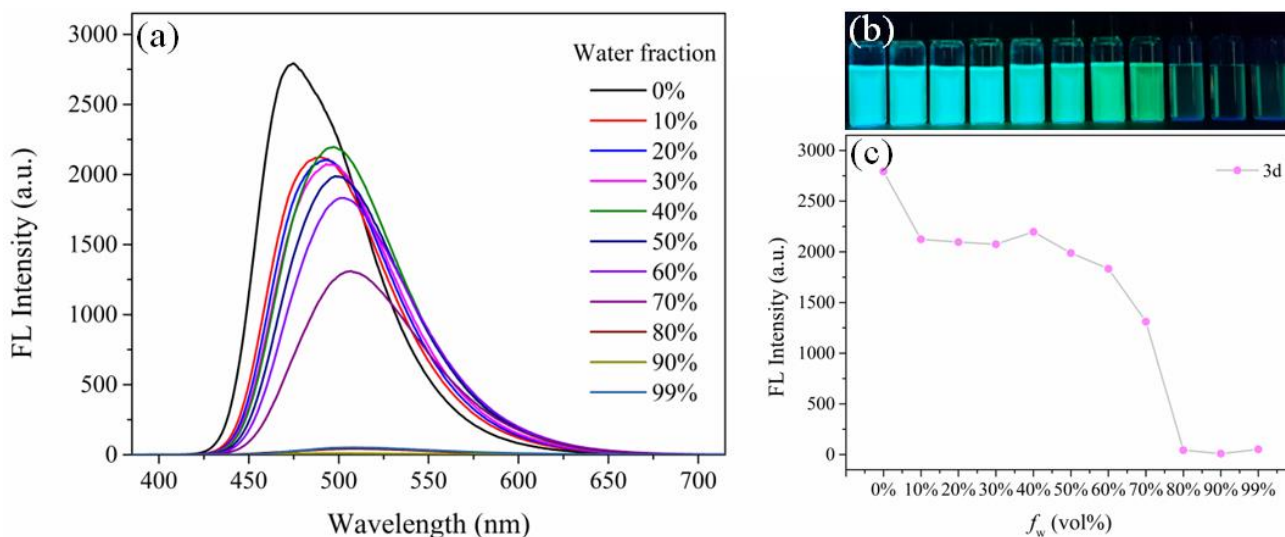

**Fig. S79.** (a) The fluorescence spectra and (b) photos of compound **3d** ( $10^{-5}$  M) and (c) plot of maximum emission intensity versus water fraction ( $f_w$ ) in THF/H<sub>2</sub>O mixtures.



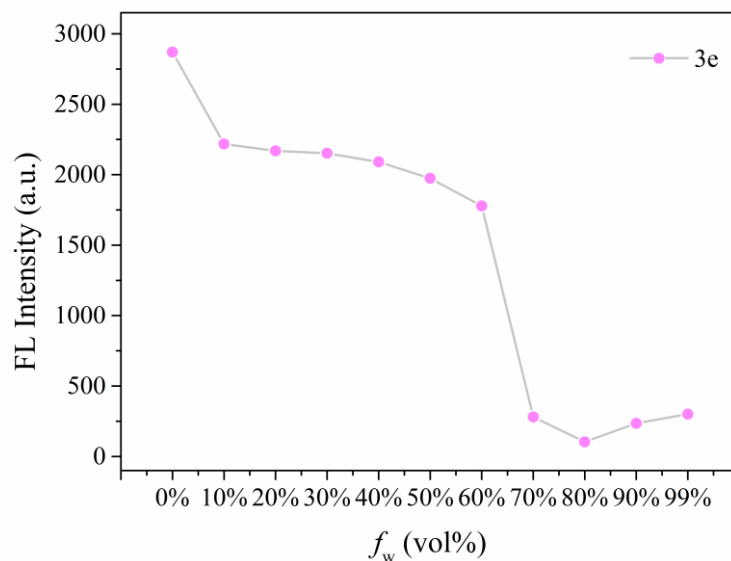

**Fig. S80.** The plot of maximum emission intensity of compound **3e** ( $10^{-5}$  M) versus water fraction ( $f_w$ ) in THF/H<sub>2</sub>O mixtures.

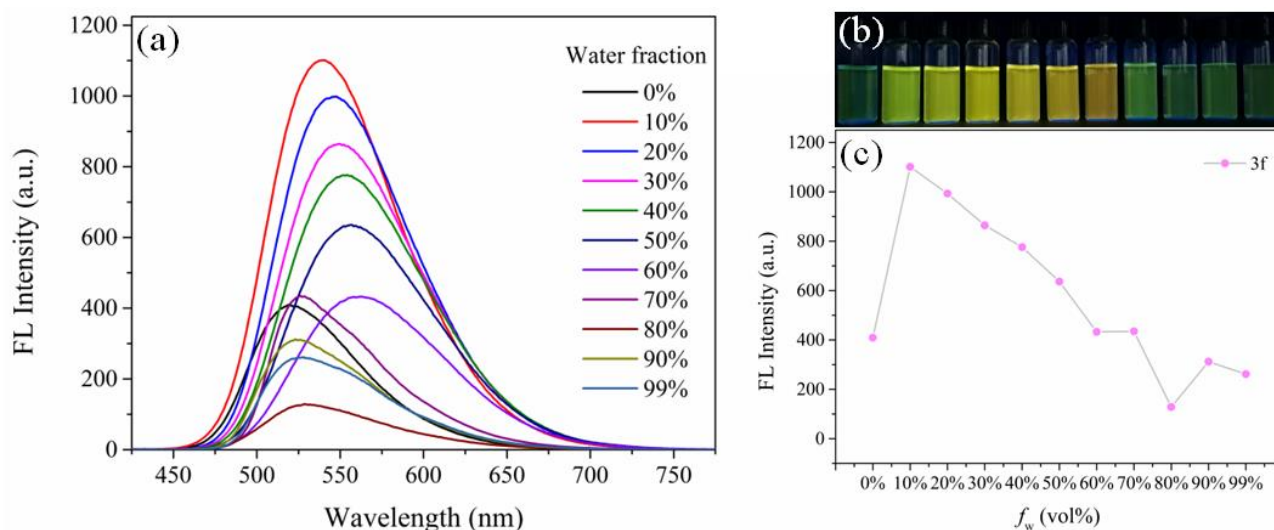

**Fig. S81.** (a) The fluorescence spectra and (b) photos of compound **3f** ( $10^{-5}$  M) and (c) plot of maximum emission intensity versus water fraction ( $f_w$ ) in THF/H<sub>2</sub>O mixtures.

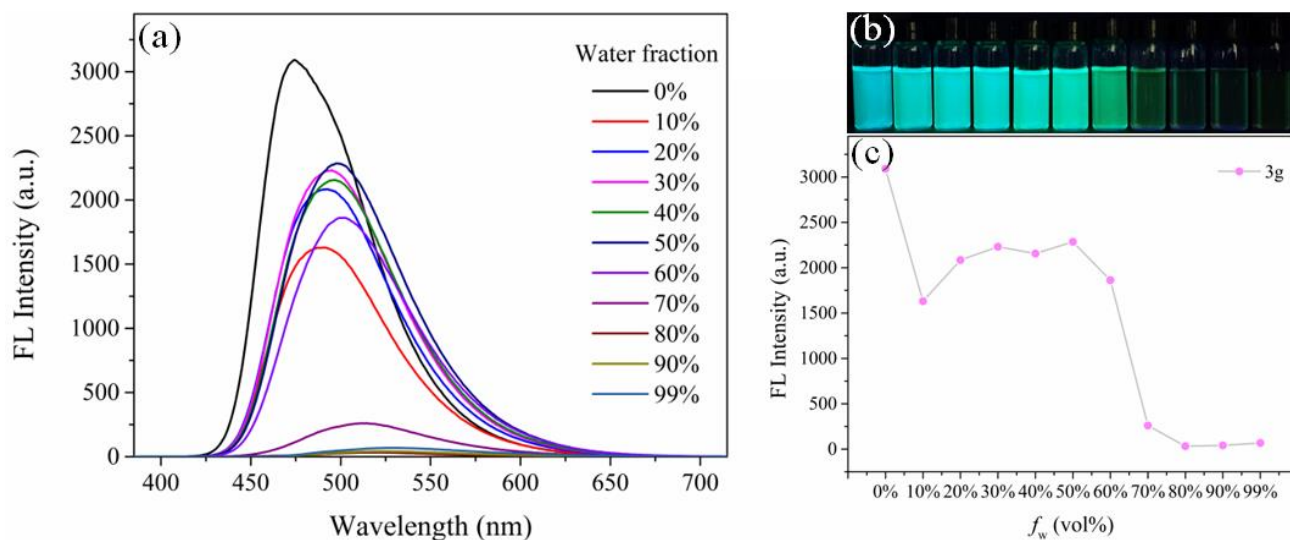

**Fig. S82.** (a) The fluorescence spectra and (b) photos of compound **3g** ( $10^{-5}$  M) and (c) plot of maximum emission intensity versus water fraction ( $f_w$ ) in THF/H<sub>2</sub>O mixtures.

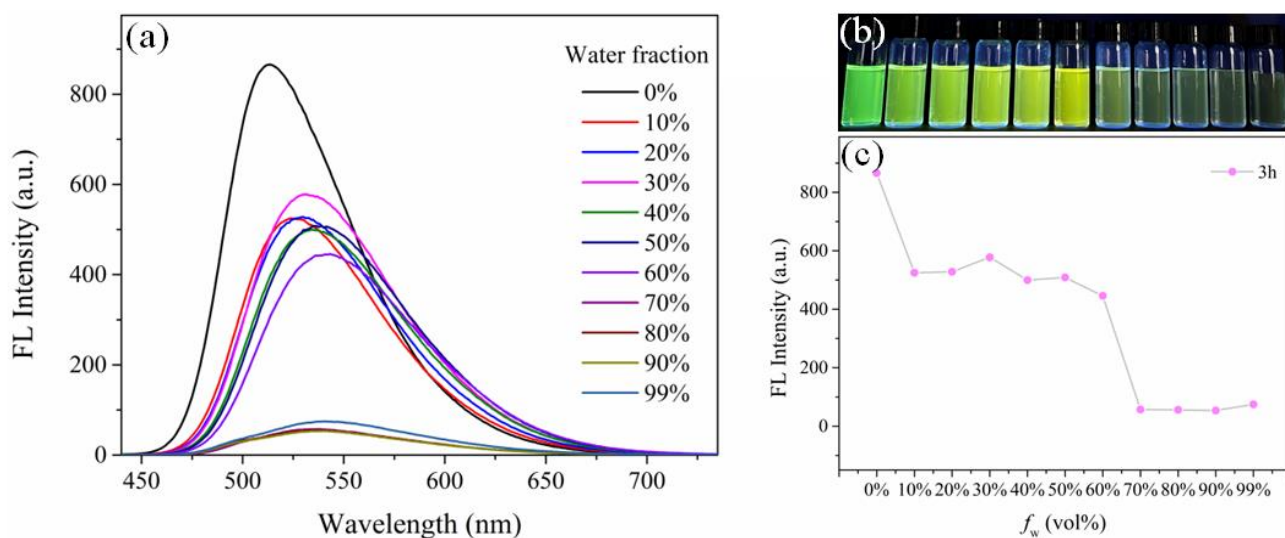

**Fig. S83.** (a) The fluorescence spectra and (b) photos of compound **3h** ( $10^{-5}$  M) and (c) plot of maximum emission intensity versus water fraction ( $f_w$ ) in THF/H<sub>2</sub>O mixtures.

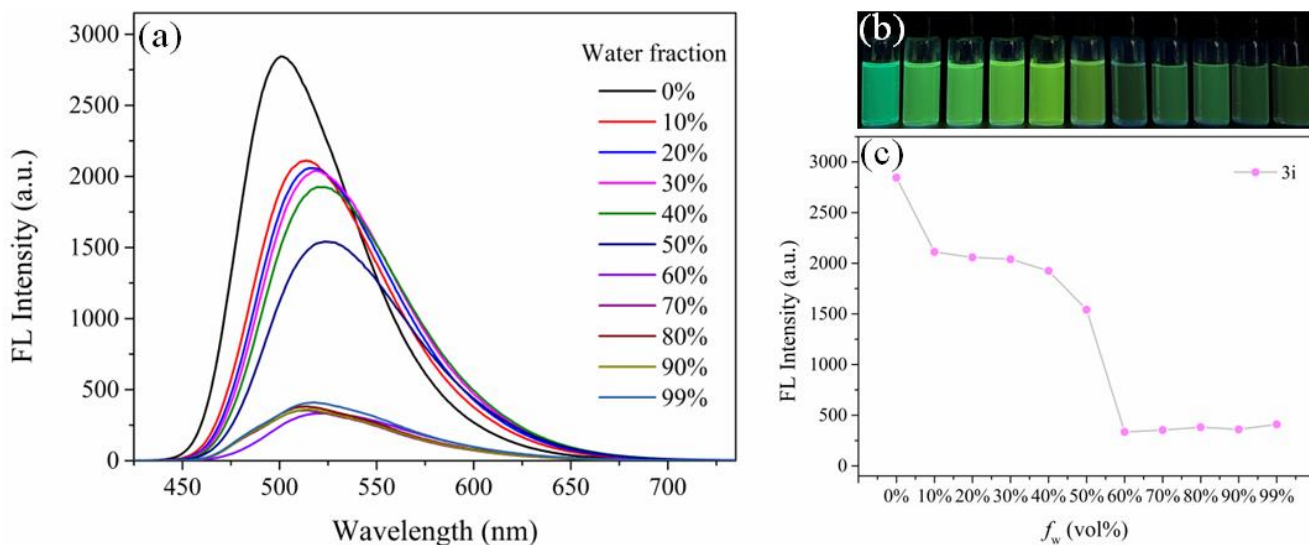

**Fig. S84.** (a) The fluorescence spectra and (b) photos of compound **3i** ( $10^{-5}$  M) and (c) plot of maximum emission intensity versus water fraction ( $f_w$ ) in THF/H<sub>2</sub>O mixtures.

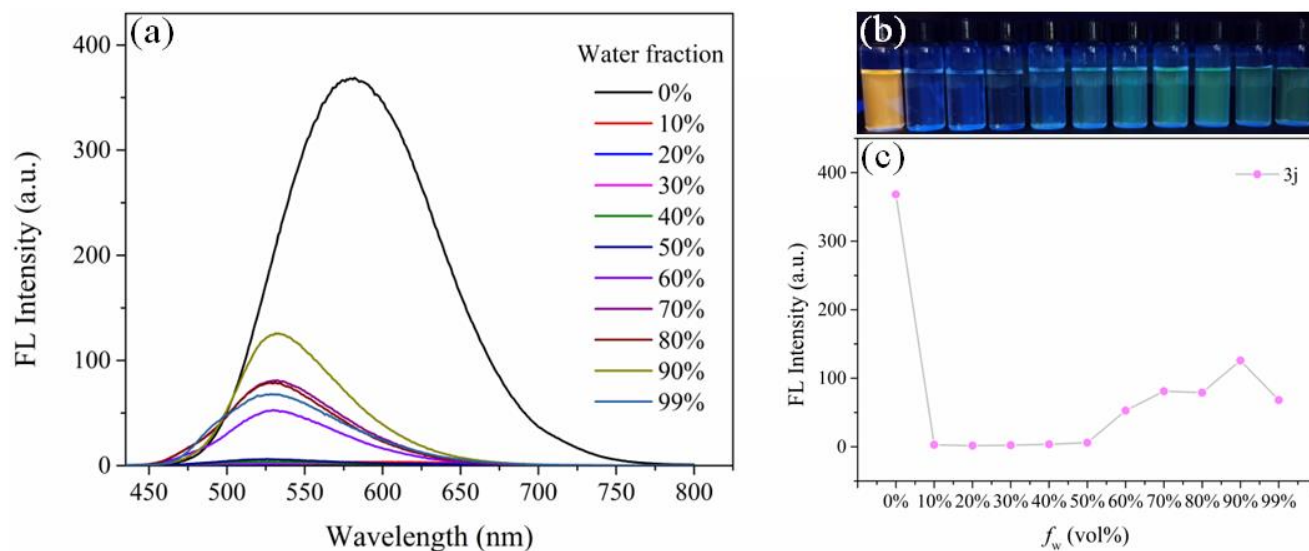

**Fig. S85.** (a) The fluorescence spectra and (b) photos of compound **3j** ( $10^{-5}$  M) and (c) plot of maximum emission intensity versus water fraction ( $f_w$ ) in THF/H<sub>2</sub>O mixtures.

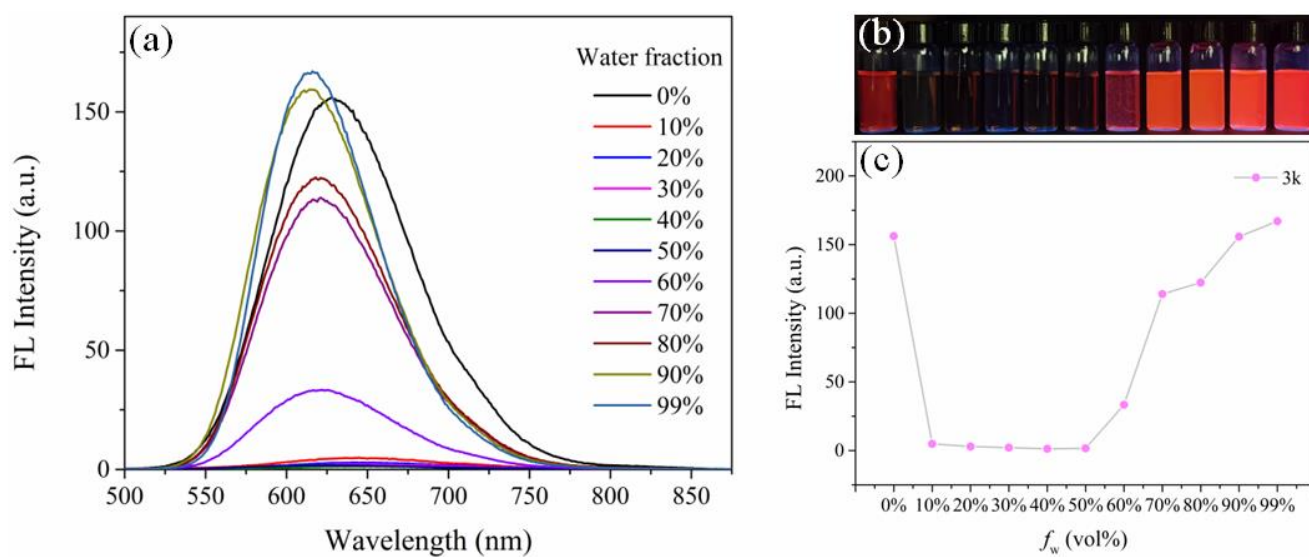

**Fig. S86.** (a) The fluorescence spectra and (b) photos of compound **3k** ( $10^{-5}$  M) and (c) plot of maximum emission intensity versus water fraction ( $f_w$ ) in THF/H<sub>2</sub>O mixtures.

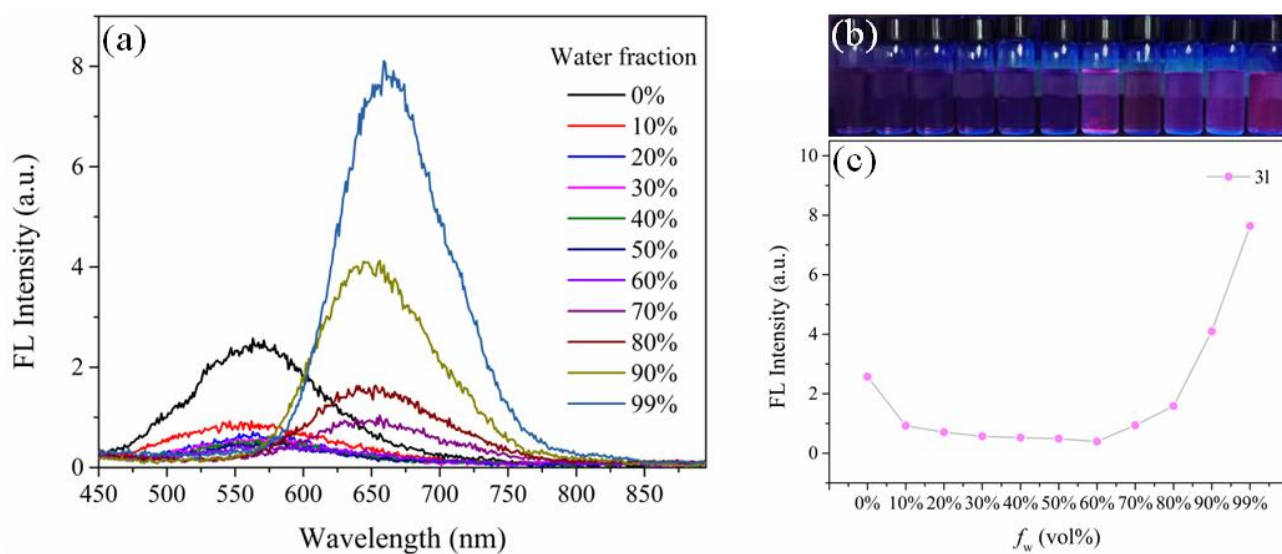

**Fig. S87.** (a) The fluorescence spectra and (b) photos of compound **31** ( $10^{-5}$  M) and (c) plot of maximum emission intensity versus water fraction ( $f_w$ ) in THF/H<sub>2</sub>O mixtures.

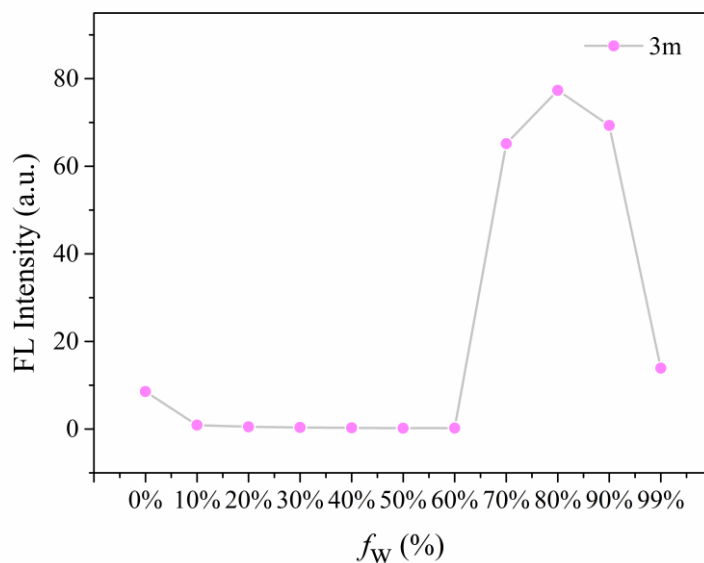

**Fig. S88.** The plot of maximum emission intensity of compound **3m** ( $10^{-5}$  M) versus water fraction ( $f_w$ ) in THF/H<sub>2</sub>O mixtures.

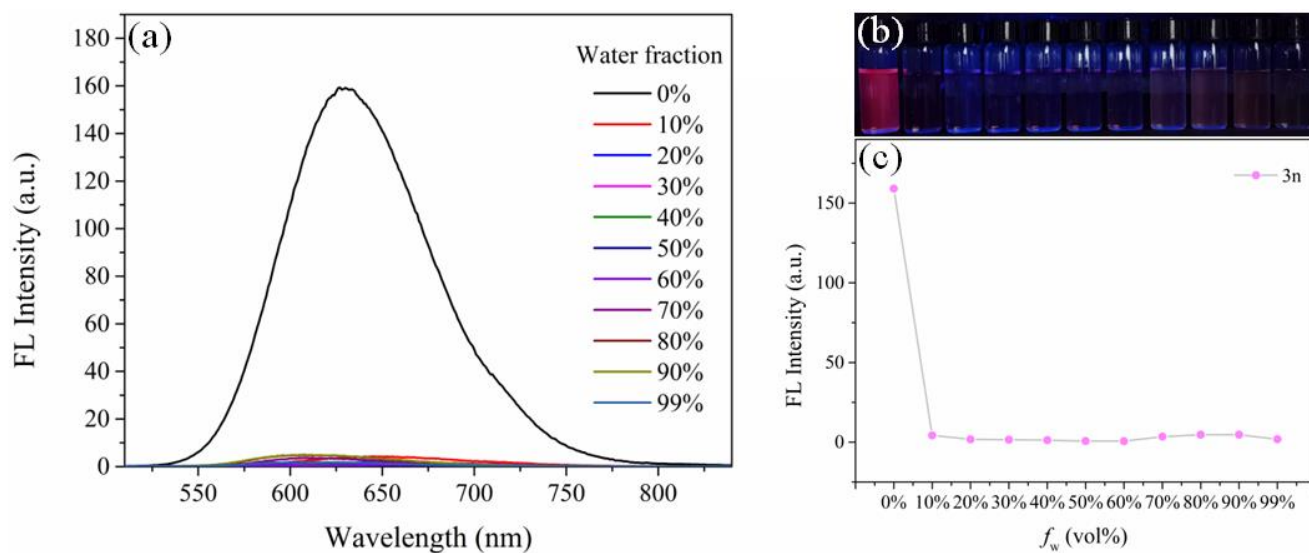

**Fig. S89.** (a) The fluorescence spectra and (b) photos of compound **3n** ( $10^{-5}$  M) and (c) plot of maximum emission intensity versus water fraction ( $f_w$ ) in THF/H<sub>2</sub>O mixtures.

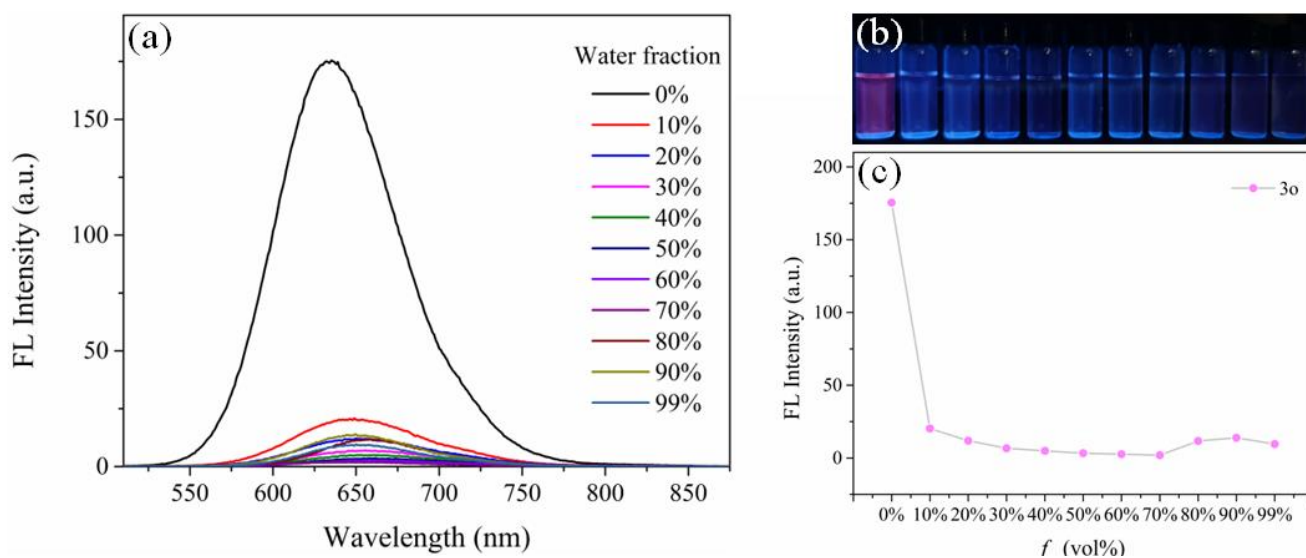

**Fig. S90.** (a) The fluorescence spectra and (b) photos of compound **3o** ( $10^{-5}$  M) and (c) plot of maximum emission intensity versus water fraction ( $f_w$ ) in THF/H<sub>2</sub>O mixtures.

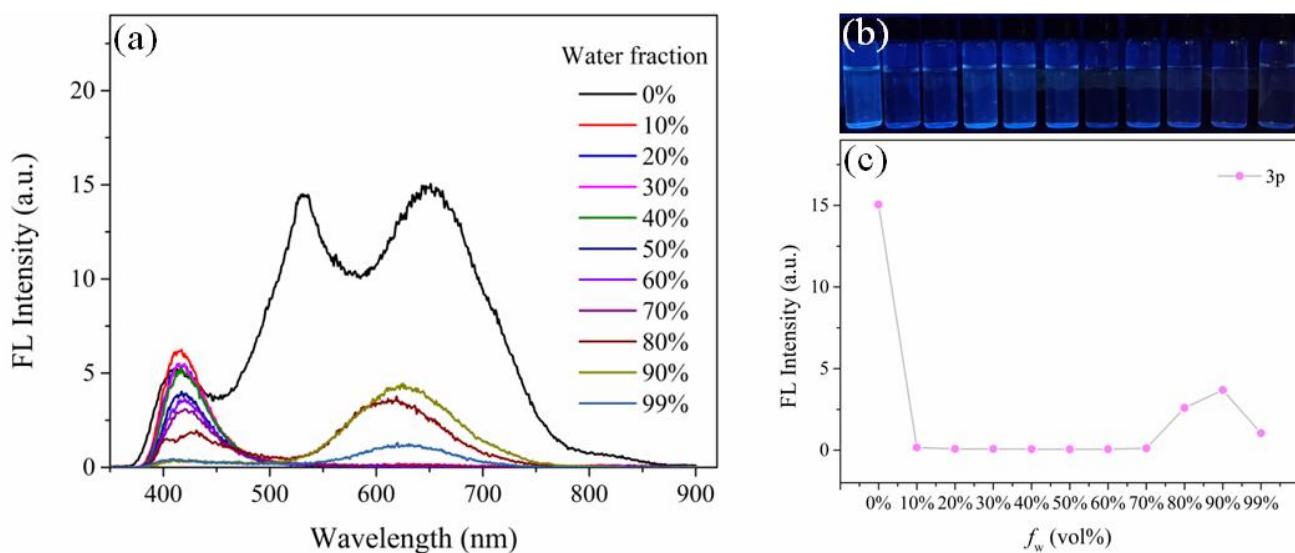

**Fig. S91.** (a) The fluorescence spectra and (b) photos of compound **3p** ( $10^{-5}$  M) and (c) plot of maximum emission intensity versus water fraction ( $f_w$ ) in THF/H<sub>2</sub>O mixtures.

## 11. AIE behaviors of compounds **3k** and **3m**

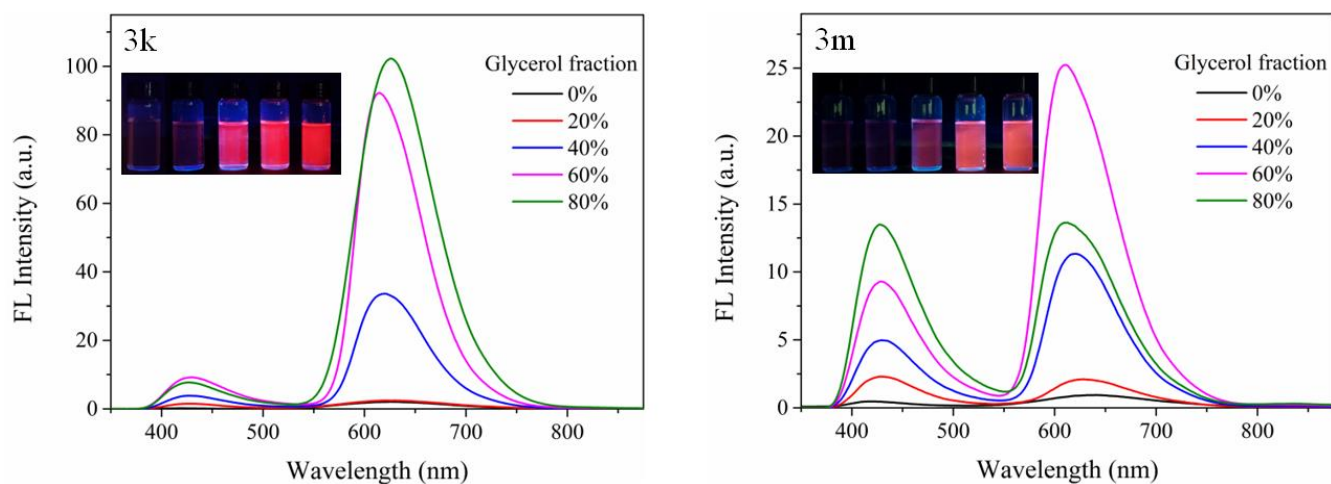

**Fig. S92.** The fluorescence spectra and photos of compounds **3k** and **3m** ( $10^{-5}$  M) in ethanol/glycerol mixtures with increasing glycerol fraction ( $f_w$ ) from 0% to 80%.

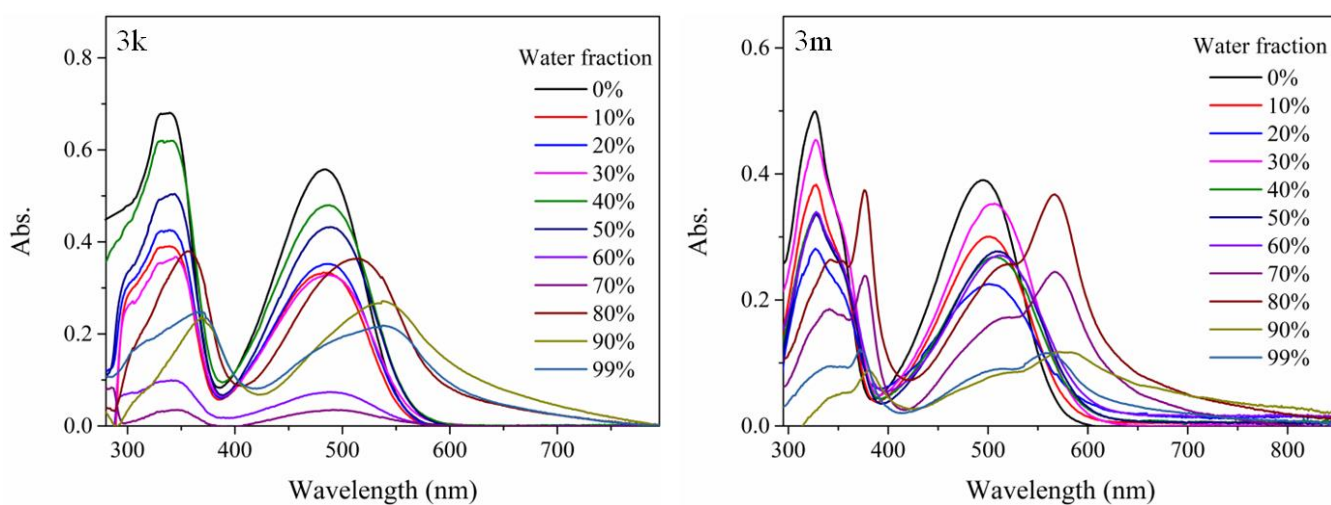

**Fig. S93.** The UV-vis spectra of compounds **3k** and **3m** ( $10^{-5}$  M) in THF/H<sub>2</sub>O mixtures with increasing water fraction ( $f_w$ ) from 0% to 99%.

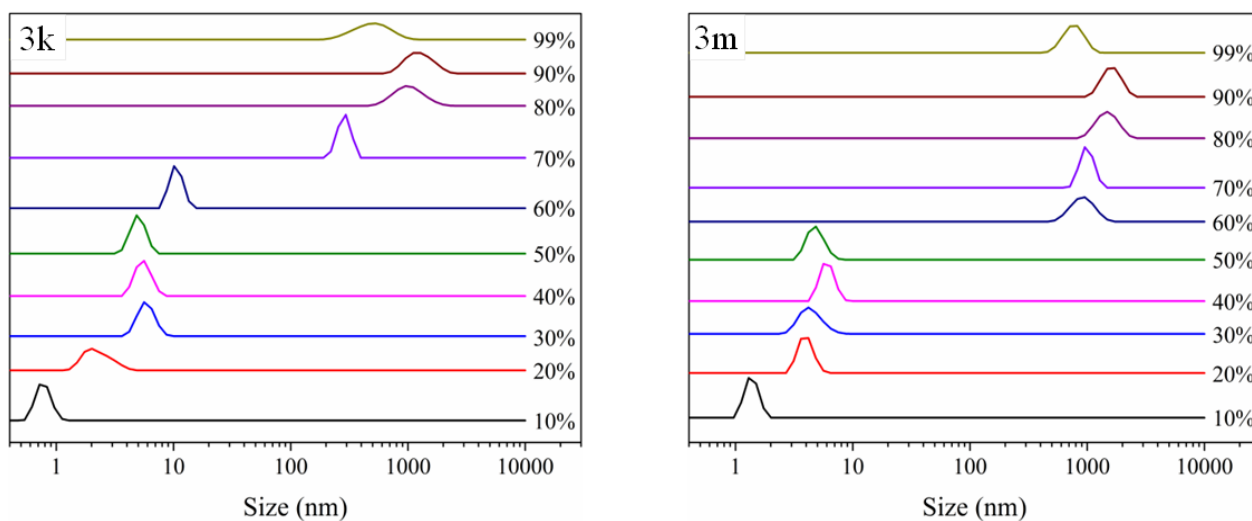

**Fig. S94.** The dynamic light scattering spectra of compounds **3k** and **3m** ( $10^{-5}$  M) in THF/H<sub>2</sub>O mixtures with increasing water fraction ( $f_w$ ) from 0% to 99%.



## 12. Photostability of compounds 3a-3p

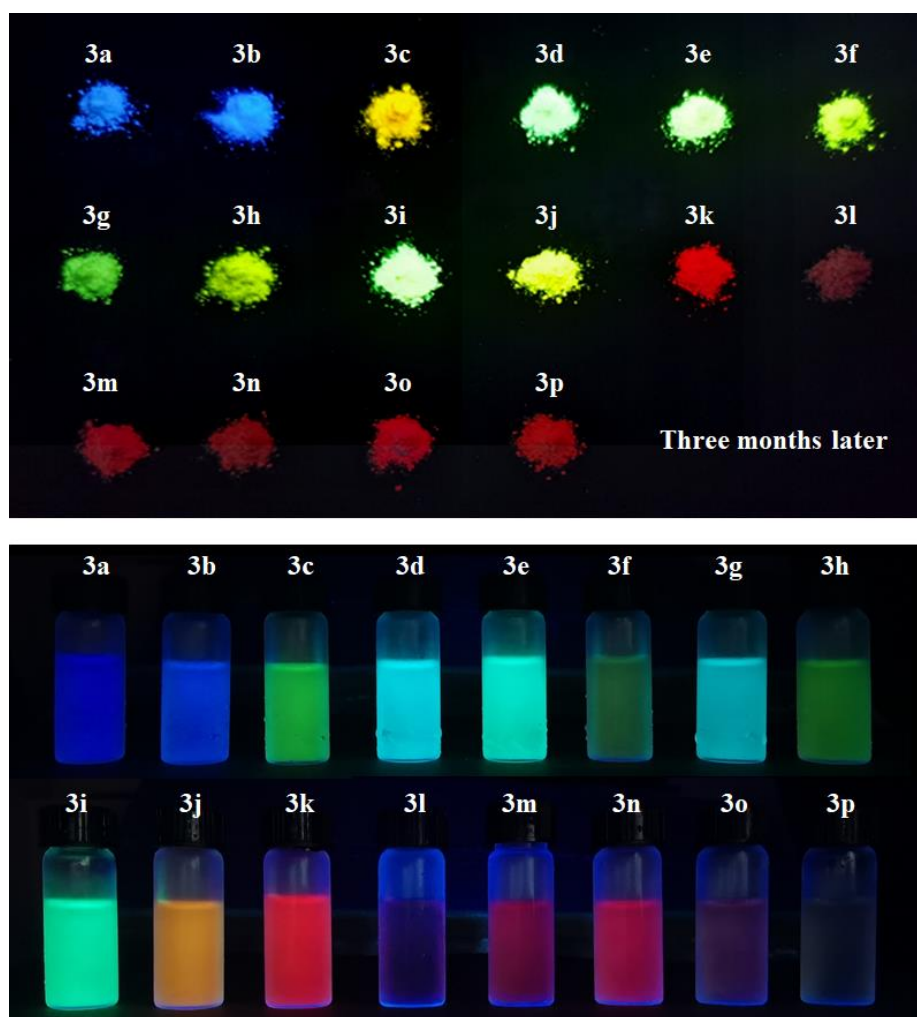

**Fig. S95.** Fluorescence pictures of solid powder and solution of compounds **3a-3p** after more than 3 months of storage.

### 13. Computational results of 3a-3p

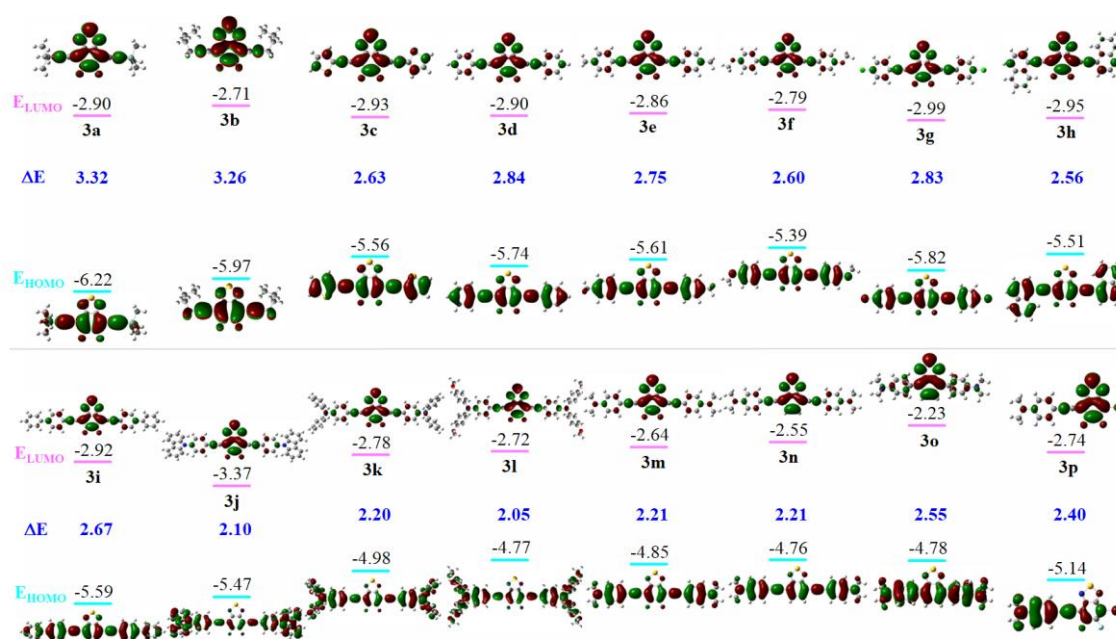

**Fig. S96.** The frontier orbitals of compounds **3a-3p** generated on B3LYP/6-31G(d,p) optimized geometries in the THF.

**Table S8.** Computational result of optimized structure of **3a**.

| Center number | Atomic number | Atomic type | Coordinates (Angstroms) |           |           |
|---------------|---------------|-------------|-------------------------|-----------|-----------|
|               |               |             | X                       | Y         | Z         |
| 1             | 6             | 0           | 0.711572                | -1.352885 | -0.002299 |
| 2             | 6             | 0           | -0.709852               | -1.353766 | -0.001135 |
| 3             | 6             | 0           | -1.469625               | -0.200874 | -0.000533 |
| 4             | 6             | 0           | -0.725301               | 1.032870  | -0.000979 |
| 5             | 6             | 0           | 0.724141                | 1.033771  | -0.002251 |
| 6             | 6             | 0           | 1.469965                | -0.199065 | -0.002815 |
| 7             | 7             | 0           | -1.260162               | 2.254213  | -0.000293 |
| 8             | 16            | 0           | -0.001998               | 3.314577  | -0.001326 |
| 9             | 7             | 0           | 1.257473                | 2.255785  | -0.002578 |
| 10            | 6             | 0           | 2.885478                | -0.233303 | -0.002874 |
| 11            | 9             | 0           | 1.305393                | -2.551076 | -0.002648 |
| 12            | 9             | 0           | -1.302219               | -2.552672 | -0.000643 |
| 13            | 6             | 0           | -2.885093               | -0.236513 | 0.000294  |
| 14            | 6             | 0           | -4.106208               | -0.265135 | 0.000589  |
| 15            | 14            | 0           | -5.958633               | -0.311995 | 0.000858  |
| 16            | 6             | 0           | 4.106604                | -0.261526 | -0.002049 |
| 17            | 14            | 0           | 5.958952                | -0.310138 | 0.001731  |
| 18            | 6             | 0           | 6.505485                | -1.613120 | 1.251663  |
| 19            | 6             | 0           | 6.536011                | -0.768245 | -1.735240 |
| 20            | 6             | 0           | 6.588318                | 1.398651  | 0.492040  |
| 21            | 6             | 0           | -6.546298               | -0.242903 | 1.792322  |
| 22            | 6             | 0           | -6.582410               | 1.182272  | -0.966231 |
| 23            | 6             | 0           | -6.500205               | -1.920761 | -0.821733 |
| 24            | 1             | 0           | 7.599158                | -1.674634 | 1.280687  |
| 25            | 1             | 0           | 6.155734                | -1.370111 | 2.259999  |

|    |   |   |           |           |           |
|----|---|---|-----------|-----------|-----------|
| 26 | 1 | 0 | 6.120120  | -2.603370 | 0.988735  |
| 27 | 1 | 0 | 7.630543  | -0.806931 | -1.771764 |
| 28 | 1 | 0 | 6.200505  | -0.033911 | -2.474324 |
| 29 | 1 | 0 | 6.154636  | -1.749628 | -2.034557 |
| 30 | 1 | 0 | 6.236947  | 1.680274  | 1.489716  |
| 31 | 1 | 0 | 7.683962  | 1.409905  | 0.505335  |
| 32 | 1 | 0 | 6.252513  | 2.164722  | -0.213972 |
| 33 | 1 | 0 | -7.640989 | -0.272886 | 1.831732  |
| 34 | 1 | 0 | -6.165577 | -1.090610 | 2.370724  |
| 35 | 1 | 0 | -6.217273 | 0.678318  | 2.283438  |
| 36 | 1 | 0 | -7.678032 | 1.190410  | -0.986259 |
| 37 | 1 | 0 | -6.227409 | 1.163391  | -2.001482 |
| 38 | 1 | 0 | -6.247236 | 2.119237  | -0.510276 |
| 39 | 1 | 0 | -6.120661 | -2.792759 | -0.279722 |
| 40 | 1 | 0 | -7.593804 | -1.987082 | -0.841963 |
| 41 | 1 | 0 | -6.140883 | -1.980742 | -1.853961 |

**Table S9.** Computational result of optimized structure of **3b**.

| Center number | Atomic number | Atomic type | Coordinates (Angstroms) |           |           |
|---------------|---------------|-------------|-------------------------|-----------|-----------|
|               |               |             | X                       | Y         | Z         |
| 1             | 6             | 0           | 0.710825                | 2.008466  | 0.062002  |
| 2             | 6             | 0           | -0.710724               | 2.008456  | 0.061982  |
| 3             | 6             | 0           | -1.473038               | 0.880907  | -0.166942 |
| 4             | 6             | 0           | -0.725241               | -0.326322 | -0.412396 |
| 5             | 6             | 0           | 0.725379                | -0.326315 | -0.412356 |
| 6             | 6             | 0           | 1.473156                | 0.880917  | -0.166851 |
| 7             | 7             | 0           | -1.258843               | -1.524521 | -0.654365 |
| 8             | 16            | 0           | 0.000095                | -2.563676 | -0.864305 |
| 9             | 7             | 0           | 1.259008                | -1.524505 | -0.654304 |
| 10            | 6             | 0           | 2.888980                | 0.910543  | -0.162797 |
| 11            | 6             | 0           | -2.888864               | 0.910530  | -0.162902 |
| 12            | 6             | 0           | 4.103071                | 0.913494  | -0.151235 |
| 13            | 6             | 0           | -4.102955               | 0.913576  | -0.151448 |
| 14            | 6             | 0           | 5.564542                | 0.934006  | -0.184735 |
| 15            | 6             | 0           | -5.564425               | 0.934114  | -0.184725 |
| 16            | 6             | 0           | 6.242404                | -0.440900 | -0.408424 |
| 17            | 6             | 0           | 6.310432                | -1.358601 | 0.822245  |
| 18            | 6             | 0           | 4.965844                | -1.885060 | 1.335680  |
| 19            | 6             | 0           | -6.242261               | -0.440785 | -0.408638 |
| 20            | 6             | 0           | -6.310817               | -1.358573 | 0.821946  |
| 21            | 6             | 0           | -4.966490               | -1.884980 | 1.336147  |
| 22            | 9             | 0           | 1.303120                | 3.185803  | 0.301846  |
| 23            | 9             | 0           | -1.303041               | 3.185780  | 0.301831  |
| 24            | 1             | 0           | 5.870815                | 1.614764  | -0.990013 |
| 25            | 1             | 0           | 5.942509                | 1.382350  | 0.744422  |

|    |   |   |           |           |           |
|----|---|---|-----------|-----------|-----------|
| 26 | 1 | 0 | -5.942265 | 1.382292  | 0.744563  |
| 27 | 1 | 0 | -5.870830 | 1.615020  | -0.989828 |
| 28 | 1 | 0 | 7.266263  | -0.238230 | -0.743420 |
| 29 | 1 | 0 | 5.740173  | -0.956571 | -1.235739 |
| 30 | 1 | 0 | 6.950978  | -2.211714 | 0.564550  |
| 31 | 1 | 0 | 6.828864  | -0.827416 | 1.632345  |
| 32 | 1 | 0 | 5.118391  | -2.600379 | 2.150868  |
| 33 | 1 | 0 | 4.329725  | -1.080266 | 1.713963  |
| 34 | 1 | 0 | 4.409062  | -2.394335 | 0.541362  |
| 35 | 1 | 0 | -7.265994 | -0.238105 | -0.744012 |
| 36 | 1 | 0 | -5.739738 | -0.956451 | -1.235775 |
| 37 | 1 | 0 | -6.951106 | -2.211735 | 0.563772  |
| 38 | 1 | 0 | -6.829798 | -0.827552 | 1.631799  |
| 39 | 1 | 0 | -5.119544 | -2.600999 | 2.150627  |
| 40 | 1 | 0 | -4.330966 | -1.080327 | 1.715741  |
| 41 | 1 | 0 | -4.408822 | -2.393437 | 0.541929  |

**Table S10.** Computational result of optimized structure of **3c**.

| Center number | Atomic number | Atomic type | Coordinates (Angstroms) |           |           |
|---------------|---------------|-------------|-------------------------|-----------|-----------|
|               |               |             | X                       | Y         | Z         |
| 1             | 6             | 0           | 0.637183                | -1.402684 | -0.000247 |
| 2             | 6             | 0           | -0.777517               | -1.332097 | -0.000034 |
| 3             | 6             | 0           | -1.482429               | -0.140286 | 0.000053  |
| 4             | 6             | 0           | -0.674704               | 1.054516  | 0.000070  |
| 5             | 6             | 0           | 0.773078                | 0.982233  | -0.000083 |
| 6             | 6             | 0           | 1.457436                | -0.287143 | -0.000213 |
| 7             | 7             | 0           | -1.146644               | 2.301051  | 0.000131  |
| 8             | 16            | 0           | 0.163264                | 3.297805  | 0.000191  |
| 9             | 7             | 0           | 1.367370                | 2.175237  | -0.000044 |
| 10            | 6             | 0           | 2.861897                | -0.387733 | -0.000448 |
| 11            | 9             | 0           | 1.174908                | -2.628980 | -0.000325 |
| 12            | 9             | 0           | -1.434520               | -2.498914 | -0.000016 |
| 13            | 6             | 0           | -2.889984               | -0.100640 | 0.000171  |
| 14            | 6             | 0           | 4.077739                | -0.476932 | -0.000084 |
| 15            | 6             | 0           | -4.107767               | -0.043639 | 0.000080  |
| 16            | 6             | 0           | 5.477804                | -0.556713 | 0.000043  |
| 17            | 6             | 0           | -5.509412               | 0.001819  | 0.000049  |
| 18            | 16            | 0           | 6.472005                | 0.897535  | -0.000382 |
| 19            | 6             | 0           | 7.923465                | -0.044387 | 0.000076  |
| 20            | 6             | 0           | 7.664333                | -1.391143 | 0.000572  |
| 21            | 6             | 0           | 6.276195                | -1.687605 | 0.000548  |
| 22            | 6             | 0           | -6.333826               | 1.113818  | -0.000042 |
| 23            | 6             | 0           | -7.714689               | 0.785160  | -0.000077 |
| 24            | 6             | 0           | -7.942704               | -0.567195 | 0.000001  |
| 25            | 16            | 0           | -6.469613               | -1.475114 | 0.000077  |

|    |   |   |           |           |           |
|----|---|---|-----------|-----------|-----------|
| 26 | 1 | 0 | 8.884252  | 0.451690  | -0.000009 |
| 27 | 1 | 0 | 8.441348  | -2.146227 | 0.000953  |
| 28 | 1 | 0 | 5.863931  | -2.689261 | 0.000913  |
| 29 | 1 | 0 | -5.944485 | 2.124578  | -0.000075 |
| 30 | 1 | 0 | -8.509027 | 1.522002  | -0.000139 |
| 31 | 1 | 0 | -8.891668 | -1.085486 | 0.000025  |



**Table S11.** Computational result of optimized structure of **3d**.

| Center number | Atomic number | Atomic type | Coordinates (Angstroms) |           |           |
|---------------|---------------|-------------|-------------------------|-----------|-----------|
|               |               |             | X                       | Y         | Z         |
| 1             | 6             | 0           | 0.709089                | -1.369354 | -0.000084 |
| 2             | 6             | 0           | -0.709067               | -1.369365 | -0.000087 |
| 3             | 6             | 0           | -1.471950               | -0.215298 | -0.000085 |
| 4             | 6             | 0           | -0.724882               | 1.018032  | -0.000078 |
| 5             | 6             | 0           | 0.724869                | 1.018043  | -0.000041 |
| 6             | 6             | 0           | 1.471958                | -0.215277 | -0.000065 |
| 7             | 7             | 0           | -1.258776               | 2.239543  | -0.000047 |
| 8             | 16            | 0           | -0.000023               | 3.300074  | -0.000019 |
| 9             | 7             | 0           | 1.258748                | 2.239560  | -0.000061 |
| 10            | 6             | 0           | 2.882064                | -0.247305 | -0.000051 |
| 11            | 9             | 0           | 1.304758                | -2.568182 | -0.000059 |
| 12            | 9             | 0           | -1.304719               | -2.568200 | -0.000100 |
| 13            | 6             | 0           | -2.882059               | -0.247352 | -0.000090 |
| 14            | 6             | 0           | 4.099201                | -0.265491 | -0.000001 |
| 15            | 6             | 0           | -4.099196               | -0.265543 | -0.000007 |
| 16            | 6             | 0           | 5.521957                | -0.285368 | 0.000034  |
| 17            | 6             | 0           | -5.521959               | -0.285389 | 0.000034  |
| 18            | 6             | 0           | 6.219423                | -1.511270 | 0.000002  |
| 19            | 6             | 0           | 7.611195                | -1.523136 | 0.000034  |
| 20            | 6             | 0           | 8.326305                | -0.322048 | 0.000105  |
| 21            | 6             | 0           | 7.642861                | 0.897377  | 0.000140  |
| 22            | 6             | 0           | 6.251300                | 0.921889  | 0.000102  |
| 23            | 6             | 0           | -6.251279               | 0.921877  | 0.000000  |
| 24            | 6             | 0           | -7.642843               | 0.897387  | 0.000037  |
| 25            | 6             | 0           | -8.326303               | -0.322027 | 0.000116  |

|    |   |   |           |           |           |
|----|---|---|-----------|-----------|-----------|
| 26 | 6 | 0 | -7.611210 | -1.523129 | 0.000151  |
| 27 | 6 | 0 | -6.219441 | -1.511285 | 0.000109  |
| 28 | 1 | 0 | 5.660165  | -2.440973 | -0.000053 |
| 29 | 1 | 0 | 8.139953  | -2.471289 | 0.000007  |
| 30 | 1 | 0 | 9.411863  | -0.336291 | 0.000132  |
| 31 | 1 | 0 | 8.196235  | 1.831376  | 0.000193  |
| 32 | 1 | 0 | 5.715978  | 1.865523  | 0.000128  |
| 33 | 1 | 0 | -5.715946 | 1.865506  | -0.000056 |
| 34 | 1 | 0 | -8.196201 | 1.831395  | 0.000011  |
| 35 | 1 | 0 | -9.411861 | -0.336254 | 0.000145  |
| 36 | 1 | 0 | -8.139985 | -2.471272 | 0.000206  |
| 37 | 1 | 0 | -5.660194 | -2.440994 | 0.000132  |

**Table S12.** Computational result of optimized structure of **3e**.

| Center number | Atomic number | Atomic type | Coordinates (Angstroms) |           |           |
|---------------|---------------|-------------|-------------------------|-----------|-----------|
|               |               |             | X                       | Y         | Z         |
| 1             | 6             | 0           | 0.709553                | -1.340202 | -0.000378 |
| 2             | 6             | 0           | -0.708157               | -1.340938 | -0.000390 |
| 3             | 6             | 0           | -1.472586               | -0.187562 | -0.000315 |
| 4             | 6             | 0           | -0.725512               | 1.045969  | -0.000279 |
| 5             | 6             | 0           | 0.724547                | 1.046717  | -0.000274 |
| 6             | 6             | 0           | 1.472843                | -0.186035 | -0.000307 |
| 7             | 7             | 0           | -1.259908               | 2.267286  | -0.000230 |
| 8             | 16            | 0           | -0.001651               | 3.328674  | -0.000252 |
| 9             | 7             | 0           | 1.257704                | 2.268579  | -0.000183 |
| 10            | 6             | 0           | 2.882603                | -0.217645 | -0.000249 |
| 11            | 9             | 0           | 1.306015                | -2.539233 | -0.000418 |
| 12            | 9             | 0           | -1.303426               | -2.540572 | -0.000445 |
| 13            | 6             | 0           | -2.882326               | -0.220070 | -0.000292 |
| 14            | 6             | 0           | 4.100136                | -0.237239 | -0.000090 |
| 15            | 6             | 0           | -4.099882               | -0.238103 | -0.000103 |
| 16            | 6             | 0           | 5.521699                | -0.259828 | 0.000062  |
| 17            | 6             | 0           | -5.521499               | -0.257285 | 0.000052  |
| 18            | 6             | 0           | 6.222061                | -1.481957 | 0.000185  |
| 19            | 6             | 0           | 7.613593                | -1.493424 | 0.000352  |
| 20            | 6             | 0           | 8.352414                | -0.302054 | 0.000406  |
| 21            | 6             | 0           | 7.648194                | 0.913693  | 0.000272  |
| 22            | 6             | 0           | 6.259730                | 0.943120  | 0.000106  |
| 23            | 6             | 0           | -6.255693               | 0.944851  | 0.000300  |
| 24            | 6             | 0           | -7.646983               | 0.917591  | 0.000495  |
| 25            | 6             | 0           | -8.352293               | -0.293960 | 0.000442  |

|    |   |   |            |           |           |
|----|---|---|------------|-----------|-----------|
| 26 | 6 | 0 | -7.614430  | -1.489581 | 0.000184  |
| 27 | 6 | 0 | -6.225662  | -1.480336 | -0.000004 |
| 28 | 6 | 0 | -9.860840  | -0.322138 | 0.000621  |
| 29 | 6 | 0 | 9.861177   | -0.316287 | 0.000646  |
| 30 | 1 | 0 | 5.667137   | -2.414405 | 0.000144  |
| 31 | 1 | 0 | 8.137122   | -2.445436 | 0.000443  |
| 32 | 1 | 0 | 8.199800   | 1.850131  | 0.000297  |
| 33 | 1 | 0 | 5.731154   | 1.890737  | 0.000004  |
| 34 | 1 | 0 | -5.726401  | 1.892028  | 0.000360  |
| 35 | 1 | 0 | -8.196801  | 1.854683  | 0.000703  |
| 36 | 1 | 0 | -8.139735  | -2.441037 | 0.000141  |
| 37 | 1 | 0 | -5.671429  | -2.413235 | -0.000193 |
| 38 | 1 | 0 | -10.279739 | 0.687124  | 0.001292  |
| 39 | 1 | 0 | -10.246549 | -0.847924 | -0.880089 |
| 40 | 1 | 0 | -10.246329 | -0.849019 | 0.880768  |
| 41 | 1 | 0 | 10.251285  | -1.337016 | 0.000230  |
| 42 | 1 | 0 | 10.261595  | 0.199419  | -0.879450 |
| 43 | 1 | 0 | 10.261291  | 0.198562  | 0.881388  |

**Table S13.** Computational result of optimized structure of **3f**.

| Center number | Atomic number | Atomic type | Coordinates (Angstroms) |           |           |
|---------------|---------------|-------------|-------------------------|-----------|-----------|
|               |               |             | X                       | Y         | Z         |
| 1             | 6             | 0           | 0.674487                | -1.339698 | -0.000236 |
| 2             | 6             | 0           | -0.742021               | -1.304669 | -0.000224 |
| 3             | 6             | 0           | -1.478404               | -0.132608 | -0.000175 |
| 4             | 6             | 0           | -0.699329               | 1.081264  | -0.000160 |
| 5             | 6             | 0           | 0.750736                | 1.045393  | -0.000193 |
| 6             | 6             | 0           | 1.468350                | -0.205693 | -0.000202 |
| 7             | 7             | 0           | -1.202437               | 2.315825  | -0.000162 |
| 8             | 16            | 0           | 0.082172                | 3.345404  | -0.000203 |
| 9             | 7             | 0           | 1.314486                | 2.253418  | -0.000131 |
| 10            | 6             | 0           | 2.876227                | -0.272785 | -0.000198 |
| 11            | 9             | 0           | 1.241038                | -2.554097 | -0.000277 |
| 12            | 9             | 0           | -1.368022               | -2.489573 | -0.000238 |
| 13            | 6             | 0           | -2.887864               | -0.127728 | -0.000145 |
| 14            | 6             | 0           | 4.093438                | -0.324190 | -0.000071 |
| 15            | 6             | 0           | -4.106040               | -0.110505 | -0.000052 |
| 16            | 6             | 0           | 5.511880                | -0.385791 | 0.000032  |
| 17            | 6             | 0           | -5.525609               | -0.084843 | 0.000053  |
| 18            | 6             | 0           | 6.182806                | -1.630638 | 0.000059  |
| 19            | 6             | 0           | 7.565467                | -1.687490 | 0.000167  |
| 20            | 6             | 0           | 8.325107                | -0.503787 | 0.000251  |
| 21            | 6             | 0           | 7.675470                | 0.739862  | 0.000230  |
| 22            | 6             | 0           | 6.284679                | 0.791082  | 0.000119  |
| 23            | 6             | 0           | -6.225372               | 1.144110  | 0.000207  |
| 24            | 6             | 0           | -7.608922               | 1.168792  | 0.000318  |
| 25            | 6             | 0           | -8.340827               | -0.032286 | 0.000275  |

|    |   |   |            |           |           |
|----|---|---|------------|-----------|-----------|
| 26 | 6 | 0 | -7.662462  | -1.260409 | 0.000131  |
| 27 | 6 | 0 | -6.270768  | -1.279324 | 0.000019  |
| 28 | 8 | 0 | 9.672794   | -0.669583 | 0.000372  |
| 29 | 6 | 0 | 10.502730  | 0.491957  | 0.000148  |
| 30 | 8 | 0 | -9.692022  | 0.102147  | 0.000420  |
| 31 | 6 | 0 | -10.494891 | -1.078238 | 0.000031  |
| 32 | 1 | 0 | 5.603134   | -2.547714 | -0.000014 |
| 33 | 1 | 0 | 8.086478   | -2.639029 | 0.000181  |
| 34 | 1 | 0 | 8.239831   | 1.664078  | 0.000307  |
| 35 | 1 | 0 | 5.784788   | 1.754018  | 0.000101  |
| 36 | 1 | 0 | -5.666653  | 2.074043  | 0.000226  |
| 37 | 1 | 0 | -8.151895  | 2.107974  | 0.000424  |
| 38 | 1 | 0 | -8.205329  | -2.197388 | 0.000119  |
| 39 | 1 | 0 | -5.749222  | -2.230765 | -0.000101 |
| 40 | 1 | 0 | 11.528828  | 0.124483  | 0.000019  |
| 41 | 1 | 0 | 10.334373  | 1.101904  | -0.894301 |
| 42 | 1 | 0 | 10.334654  | 1.102050  | 0.894552  |
| 43 | 1 | 0 | -11.529211 | -0.734572 | -0.000103 |
| 44 | 1 | 0 | -10.312528 | -1.684018 | -0.894521 |
| 45 | 1 | 0 | -10.312876 | -1.684376 | 0.894412  |

**Table S14.** Computational result of optimized structure of **3g**.

| Center number | Atomic number | Atomic type | Coordinates (Angstroms) |           |           |
|---------------|---------------|-------------|-------------------------|-----------|-----------|
|               |               |             | X                       | Y         | Z         |
| 1             | 6             | 0           | 0.709109                | -1.325021 | -0.000058 |
| 2             | 6             | 0           | -0.709145               | -1.325002 | -0.000069 |
| 3             | 6             | 0           | -1.470904               | -0.170212 | -0.000052 |
| 4             | 6             | 0           | -0.724647               | 1.063429  | -0.000041 |
| 5             | 6             | 0           | 0.724678                | 1.063408  | -0.000040 |
| 6             | 6             | 0           | 1.470902                | -0.170255 | -0.000046 |
| 7             | 7             | 0           | -1.258608               | 2.284820  | -0.000050 |
| 8             | 16            | 0           | 0.000048                | 3.345222  | -0.000021 |
| 9             | 7             | 0           | 1.258675                | 2.284783  | -0.000012 |
| 10            | 6             | 0           | 2.880951                | -0.202050 | -0.000036 |
| 11            | 9             | 0           | 1.305093                | -2.523028 | -0.000069 |
| 12            | 9             | 0           | -1.305164               | -2.522990 | -0.000080 |
| 13            | 6             | 0           | -2.880957               | -0.201972 | -0.000069 |
| 14            | 6             | 0           | 4.097798                | -0.218809 | -0.000004 |
| 15            | 6             | 0           | -4.097804               | -0.218716 | -0.000008 |
| 16            | 6             | 0           | 5.519407                | -0.236059 | 0.000013  |
| 17            | 6             | 0           | -5.519419               | -0.235992 | 0.000009  |
| 18            | 6             | 0           | 6.221449                | -1.458652 | 0.000009  |
| 19            | 6             | 0           | 7.611991                | -1.476788 | 0.000025  |
| 20            | 6             | 0           | 8.307663                | -0.266924 | 0.000045  |
| 21            | 6             | 0           | 7.638953                | 0.958088  | 0.000049  |
| 22            | 6             | 0           | 6.248412                | 0.970734  | 0.000034  |
| 23            | 6             | 0           | -6.248448               | 0.970782  | -0.000009 |
| 24            | 6             | 0           | -7.638992               | 0.958102  | 0.000011  |
| 25            | 6             | 0           | -8.307669               | -0.266925 | 0.000048  |

|    |    |   |            |           |           |
|----|----|---|------------|-----------|-----------|
| 26 | 6  | 0 | -7.611969  | -1.476775 | 0.000068  |
| 27 | 6  | 0 | -6.221429  | -1.458606 | 0.000051  |
| 28 | 17 | 0 | 10.066784  | -0.286363 | 0.000065  |
| 29 | 17 | 0 | -10.066792 | -0.286410 | 0.000070  |
| 30 | 1  | 0 | 5.669890   | -2.392416 | -0.000006 |
| 31 | 1  | 0 | 8.150171   | -2.417687 | 0.000022  |
| 32 | 1  | 0 | 8.197842   | 1.886826  | 0.000065  |
| 33 | 1  | 0 | 5.717085   | 1.916119  | 0.000038  |
| 34 | 1  | 0 | -5.717147  | 1.916180  | -0.000038 |
| 35 | 1  | 0 | -8.197901  | 1.886827  | -0.000004 |
| 36 | 1  | 0 | -8.150129  | -2.417686 | 0.000099  |
| 37 | 1  | 0 | -5.669844  | -2.392353 | 0.000068  |



**Table S15.** Computational result of optimized structure of **3h**.

| Center number | Atomic number | Atomic type | Coordinates (Angstroms) |           |           |
|---------------|---------------|-------------|-------------------------|-----------|-----------|
|               |               |             | X                       | Y         | Z         |
| 1             | 6             | 0           | 0.391961                | -1.368291 | -0.000095 |
| 2             | 6             | 0           | -0.991671               | -1.063098 | -0.000201 |
| 3             | 6             | 0           | -1.489674               | 0.228778  | -0.000193 |
| 4             | 6             | 0           | -0.497059               | 1.273761  | -0.000149 |
| 5             | 6             | 0           | 0.918502                | 0.962103  | -0.000029 |
| 6             | 6             | 0           | 1.383955                | -0.402897 | -0.000023 |
| 7             | 7             | 0           | -0.756273               | 2.581436  | -0.000109 |
| 8             | 16            | 0           | 0.700601                | 3.347425  | 0.000012  |
| 9             | 7             | 0           | 1.701857                | 2.040691  | 0.000000  |
| 10            | 6             | 0           | 2.755159                | -0.726919 | 0.000045  |
| 11            | 9             | 0           | 0.719058                | -2.666475 | -0.000158 |
| 12            | 9             | 0           | -1.834457               | -2.105437 | -0.000379 |
| 13            | 6             | 0           | -2.875491               | 0.482320  | -0.000324 |
| 14            | 6             | 0           | 3.948039                | -0.973219 | 0.000044  |
| 15            | 6             | 0           | -4.080608               | 0.658390  | -0.000104 |
| 16            | 6             | 0           | 5.340365                | -1.251616 | 0.000059  |
| 17            | 6             | 0           | -5.489709               | 0.829402  | -0.000025 |
| 18            | 6             | 0           | 6.297569                | -0.173803 | 0.000060  |
| 19            | 6             | 0           | 7.692657                | -0.499279 | 0.000080  |
| 20            | 6             | 0           | 8.093294                | -1.862450 | 0.000106  |
| 21            | 6             | 0           | 7.157968                | -2.874843 | 0.000106  |
| 22            | 6             | 0           | 5.782148                | -2.572389 | 0.000080  |
| 23            | 6             | 0           | -6.036861               | 2.109866  | 0.000022  |
| 24            | 6             | 0           | -7.432795               | 2.299099  | 0.000107  |
| 25            | 6             | 0           | -8.282539               | 1.213848  | 0.000162  |

|    |   |   |           |           |           |
|----|---|---|-----------|-----------|-----------|
| 26 | 6 | 0 | -7.772448 | -0.112302 | 0.000135  |
| 27 | 6 | 0 | -6.355736 | -0.323225 | 0.000036  |
| 28 | 6 | 0 | -8.635590 | -1.241952 | 0.000210  |
| 29 | 6 | 0 | -8.125021 | -2.520268 | 0.000194  |
| 30 | 6 | 0 | -6.724334 | -2.725054 | 0.000097  |
| 31 | 6 | 0 | -5.858967 | -1.652211 | 0.000020  |
| 32 | 6 | 0 | 5.911217  | 1.191311  | 0.000040  |
| 33 | 6 | 0 | 6.861397  | 2.189963  | 0.000044  |
| 34 | 6 | 0 | 8.240754  | 1.871884  | 0.000065  |
| 35 | 6 | 0 | 8.645109  | 0.556160  | 0.000082  |
| 36 | 1 | 0 | 9.154647  | -2.094739 | 0.000122  |
| 37 | 1 | 0 | 7.474826  | -3.912871 | 0.000135  |
| 38 | 1 | 0 | 5.051328  | -3.374131 | 0.000084  |
| 39 | 1 | 0 | -5.373283 | 2.968079  | -0.000019 |
| 40 | 1 | 0 | -7.833232 | 3.307810  | 0.000131  |
| 41 | 1 | 0 | -9.359268 | 1.358692  | 0.000227  |
| 42 | 1 | 0 | -9.709394 | -1.076193 | 0.000281  |
| 43 | 1 | 0 | -8.794202 | -3.375259 | 0.000260  |
| 44 | 1 | 0 | -6.329934 | -3.736689 | 0.000099  |
| 45 | 1 | 0 | -4.785479 | -1.811930 | -0.000034 |
| 46 | 1 | 0 | 4.854427  | 1.439312  | -0.000001 |
| 47 | 1 | 0 | 6.550588  | 3.230366  | 0.000031  |
| 48 | 1 | 0 | 8.977535  | 2.669363  | 0.000062  |
| 49 | 1 | 0 | 9.701785  | 0.303304  | 0.000101  |

**Table S16.** Computational result of optimized structure of **3i**.

| Center number | Atomic number | Atomic type | Coordinates (Angstroms) |           |           |
|---------------|---------------|-------------|-------------------------|-----------|-----------|
|               |               |             | X                       | Y         | Z         |
| 1             | 6             | 0           | -0.708844               | -1.261493 | -0.003300 |
| 2             | 6             | 0           | 0.708753                | -1.261555 | -0.002416 |
| 3             | 6             | 0           | 1.472162                | -0.107257 | -0.001368 |
| 4             | 6             | 0           | 0.724966                | 1.126188  | -0.001608 |
| 5             | 6             | 0           | -0.724849               | 1.126252  | -0.002956 |
| 6             | 6             | 0           | -1.472153               | -0.107129 | -0.003670 |
| 7             | 7             | 0           | 1.258872                | 2.347626  | -0.000934 |
| 8             | 16            | 0           | 0.000158                | 3.408380  | -0.001756 |
| 9             | 7             | 0           | -1.258648               | 2.347736  | -0.003100 |
| 10            | 6             | 0           | -2.881616               | -0.139176 | -0.004229 |
| 11            | 9             | 0           | -1.305017               | -2.460249 | -0.003906 |
| 12            | 9             | 0           | 1.304822                | -2.460364 | -0.002355 |
| 13            | 6             | 0           | 2.881625                | -0.139430 | -0.000275 |
| 14            | 6             | 0           | -4.099212               | -0.157491 | -0.004343 |
| 15            | 6             | 0           | 4.099220                | -0.157783 | 0.000666  |
| 16            | 6             | 0           | -5.519829               | -0.177613 | -0.003663 |
| 17            | 6             | 0           | 5.519843                | -0.177804 | 0.001430  |
| 18            | 6             | 0           | -6.223751               | -1.399480 | 0.007218  |
| 19            | 6             | 0           | -7.612215               | -1.411410 | 0.008323  |
| 20            | 6             | 0           | -8.354145               | -0.215288 | -0.000344 |
| 21            | 6             | 0           | -7.644332               | 1.000200  | -0.011244 |
| 22            | 6             | 0           | -6.256072               | 1.025121  | -0.013349 |
| 23            | 6             | 0           | 6.255979                | 1.024981  | 0.012767  |
| 24            | 6             | 0           | 7.644247                | 1.000148  | 0.012556  |
| 25            | 6             | 0           | 8.354108                | -0.215301 | 0.001937  |

|    |   |   |            |           |           |
|----|---|---|------------|-----------|-----------|
| 26 | 6 | 0 | 7.612314   | -1.411477 | -0.008619 |
| 27 | 6 | 0 | 6.223841   | -1.399629 | -0.009377 |
| 28 | 6 | 0 | -9.837717  | -0.235201 | 0.002366  |
| 29 | 6 | 0 | 9.837682   | -0.235116 | 0.001632  |
| 30 | 6 | 0 | 10.546321  | -1.217325 | -0.713158 |
| 31 | 6 | 0 | 11.940315  | -1.235684 | -0.713750 |
| 32 | 6 | 0 | 12.657039  | -0.273308 | 0.000791  |
| 33 | 6 | 0 | 11.967021  | 0.708131  | 0.715729  |
| 34 | 6 | 0 | 10.573019  | 0.727562  | 0.715968  |
| 35 | 6 | 0 | -10.574391 | 0.728856  | -0.708743 |
| 36 | 6 | 0 | -11.968385 | 0.709370  | -0.706057 |
| 37 | 6 | 0 | -12.657110 | -0.273526 | 0.008127  |
| 38 | 6 | 0 | -11.939075 | -1.237297 | 0.719459  |
| 39 | 6 | 0 | -10.545092 | -1.218857 | 0.716446  |
| 40 | 1 | 0 | -5.670583  | -2.332798 | 0.005266  |
| 41 | 1 | 0 | -8.131588  | -2.364103 | -0.008985 |
| 42 | 1 | 0 | -8.188684  | 1.938835  | 0.007233  |
| 43 | 1 | 0 | -5.727324  | 1.972438  | -0.012634 |
| 44 | 1 | 0 | 5.727159   | 1.972258  | 0.011931  |
| 45 | 1 | 0 | 8.188629   | 1.938797  | -0.004524 |
| 46 | 1 | 0 | 8.131786   | -2.364121 | 0.008689  |
| 47 | 1 | 0 | 5.670717   | -2.332975 | -0.008764 |
| 48 | 1 | 0 | 10.001824  | -1.955706 | -1.293610 |
| 49 | 1 | 0 | 12.467000  | -1.998254 | -1.279929 |
| 50 | 1 | 0 | 13.742761  | -0.288003 | 0.000499  |
| 51 | 1 | 0 | 12.514502  | 1.456167  | 1.281566  |
| 52 | 1 | 0 | 10.049079  | 1.480443  | 1.296727  |
| 53 | 1 | 0 | -10.051576 | 1.482913  | -1.288981 |
| 54 | 1 | 0 | -12.516894 | 1.458524  | -1.269412 |

|    |   |   |            |           |          |
|----|---|---|------------|-----------|----------|
| 55 | 1 | 0 | -13.742829 | -0.288258 | 0.010319 |
| 56 | 1 | 0 | -12.464718 | -2.001023 | 1.285048 |
| 57 | 1 | 0 | -9.999592  | -1.958329 | 1.294555 |

**Table S17.** Computational result of optimized structure of **3j**.

| Center number | Atomic number | Atomic type | Coordinates (Angstroms) |           |           |
|---------------|---------------|-------------|-------------------------|-----------|-----------|
|               |               |             | X                       | Y         | Z         |
| 1             | 6             | 0           | 0.708353                | -1.215847 | -0.000185 |
| 2             | 6             | 0           | -0.708422               | -1.215815 | -0.000408 |
| 3             | 6             | 0           | -1.475668               | -0.067430 | 0.000167  |
| 4             | 6             | 0           | -0.732168               | 1.176033  | 0.000401  |
| 5             | 6             | 0           | 0.732236                | 1.175994  | -0.000464 |
| 6             | 6             | 0           | 1.475645                | -0.067497 | -0.000488 |
| 7             | 7             | 0           | -1.313154               | 2.372788  | 0.000736  |
| 8             | 16            | 0           | 0.000091                | 3.578903  | 0.000175  |
| 9             | 7             | 0           | 1.313284                | 2.372727  | -0.000603 |
| 10            | 6             | 0           | 2.883139                | -0.094810 | -0.000385 |
| 11            | 9             | 0           | 1.327567                | -2.449895 | -0.000036 |
| 12            | 9             | 0           | -1.327697               | -2.449835 | -0.000868 |
| 13            | 6             | 0           | -2.883129               | -0.094638 | 0.000067  |
| 14            | 6             | 0           | 4.104405                | -0.113111 | -0.000449 |
| 15            | 6             | 0           | -4.104401               | -0.112892 | 0.000023  |
| 16            | 6             | 0           | 5.525580                | -0.127505 | -0.000497 |
| 17            | 6             | 0           | -5.525529               | -0.127343 | 0.000158  |
| 18            | 6             | 0           | 6.235958                | -1.349285 | 0.050824  |
| 19            | 6             | 0           | 7.627943                | -1.359983 | 0.058750  |
| 20            | 6             | 0           | 8.347351                | -0.152675 | -0.000807 |
| 21            | 6             | 0           | 7.649586                | 1.067340  | -0.060215 |
| 22            | 6             | 0           | 6.257726                | 1.081480  | -0.051999 |
| 23            | 6             | 0           | -6.235903               | -1.349140 | -0.050919 |
| 24            | 6             | 0           | -7.627880               | -1.359890 | -0.058722 |
| 25            | 6             | 0           | -8.347359               | -0.152606 | 0.000720  |

|    |   |   |            |           |           |
|----|---|---|------------|-----------|-----------|
| 26 | 6 | 0 | -7.649595  | 1.067444  | 0.059854  |
| 27 | 6 | 0 | -6.257750  | 1.081623  | 0.051491  |
| 28 | 7 | 0 | 9.768065   | -0.165316 | -0.001114 |
| 29 | 6 | 0 | 10.601925  | 0.596270  | 0.847280  |
| 30 | 6 | 0 | 10.587839  | -0.941318 | -0.850180 |
| 31 | 7 | 0 | -9.768031  | -0.165307 | 0.001185  |
| 32 | 6 | 0 | -10.602054 | 0.596682  | -0.846728 |
| 33 | 6 | 0 | -10.587694 | -0.941770 | 0.849981  |
| 34 | 6 | 0 | 10.232025  | -1.816524 | -1.883103 |
| 35 | 6 | 0 | 11.262759  | -2.441656 | -2.591680 |
| 36 | 6 | 0 | 12.616785  | -2.197571 | -2.286503 |
| 37 | 6 | 0 | 12.966460  | -1.310031 | -1.266070 |
| 38 | 6 | 0 | 11.950572  | -0.670584 | -0.541554 |
| 39 | 6 | 0 | 11.959492  | 0.301874  | 0.537464  |
| 40 | 6 | 0 | 12.986983  | 0.923420  | 1.261183  |
| 41 | 6 | 0 | 12.653721  | 1.816727  | 2.282077  |
| 42 | 6 | 0 | 11.304416  | 2.084320  | 2.588450  |
| 43 | 6 | 0 | 10.262333  | 1.477423  | 1.880624  |
| 44 | 6 | 0 | -11.959559 | 0.302052  | -0.536897 |
| 45 | 6 | 0 | -12.987193 | 0.923768  | -1.260261 |
| 46 | 6 | 0 | -12.654131 | 1.817548  | -2.280809 |
| 47 | 6 | 0 | -11.304887 | 2.085383  | -2.587211 |
| 48 | 6 | 0 | -10.262667 | 1.478256  | -1.879779 |
| 49 | 6 | 0 | -10.231776 | -1.817369 | 1.882541  |
| 50 | 6 | 0 | -11.262429 | -2.442821 | 2.590955  |
| 51 | 6 | 0 | -12.616489 | -2.198626 | 2.286042  |
| 52 | 6 | 0 | -12.966275 | -1.310645 | 1.266030  |
| 53 | 6 | 0 | -11.950466 | -0.670938 | 0.541641  |
| 54 | 1 | 0 | 5.687441   | -2.283001 | 0.100063  |

|    |   |   |            |           |           |
|----|---|---|------------|-----------|-----------|
| 55 | 1 | 0 | 8.161796   | -2.300225 | 0.128847  |
| 56 | 1 | 0 | 8.200091   | 1.997907  | -0.130559 |
| 57 | 1 | 0 | 5.725253   | 2.024391  | -0.101172 |
| 58 | 1 | 0 | -5.687369  | -2.282851 | -0.100129 |
| 59 | 1 | 0 | -8.161668  | -2.300175 | -0.128721 |
| 60 | 1 | 0 | -8.200085  | 1.998027  | 0.130100  |
| 61 | 1 | 0 | -5.725305  | 2.024563  | 0.100431  |
| 62 | 1 | 0 | 9.195585   | -2.004690 | -2.135707 |
| 63 | 1 | 0 | 11.011040  | -3.126254 | -3.395185 |
| 64 | 1 | 0 | 13.392630  | -2.700287 | -2.854287 |
| 65 | 1 | 0 | 14.010059  | -1.113700 | -1.041112 |
| 66 | 1 | 0 | 14.026812  | 0.708929  | 1.035331  |
| 67 | 1 | 0 | 13.438706  | 2.305718  | 2.849283  |
| 68 | 1 | 0 | 11.065321  | 2.773064  | 3.392268  |
| 69 | 1 | 0 | 9.229562   | 1.683729  | 2.134109  |
| 70 | 1 | 0 | -14.026976 | 0.709010  | -1.034446 |
| 71 | 1 | 0 | -13.439221 | 2.306703  | -2.847727 |
| 72 | 1 | 0 | -11.065927 | 2.774476  | -3.390771 |
| 73 | 1 | 0 | -9.229955  | 1.684720  | -2.133369 |
| 74 | 1 | 0 | -9.195323  | -2.005614 | 2.135017  |
| 75 | 1 | 0 | -11.010600 | -3.127742 | 3.394150  |
| 76 | 1 | 0 | -13.392268 | -2.701572 | 2.853712  |
| 77 | 1 | 0 | -14.009896 | -1.114141 | 1.041334  |



**Table S18.** Computational result of optimized structure of **3k**.

| Center number | Atomic number | Atomic type | Coordinates (Angstroms) |           |           |
|---------------|---------------|-------------|-------------------------|-----------|-----------|
|               |               |             | X                       | Y         | Z         |
| 1             | 6             | 0           | -0.707914               | -1.214469 | 0.000201  |
| 2             | 6             | 0           | 0.707941                | -1.214436 | -0.000520 |
| 3             | 6             | 0           | 1.474254                | -0.060575 | -0.000373 |
| 4             | 6             | 0           | 0.725342                | 1.172407  | 0.000075  |
| 5             | 6             | 0           | -0.725424               | 1.172373  | -0.000011 |
| 6             | 6             | 0           | -1.474281               | -0.060644 | 0.000230  |
| 7             | 7             | 0           | 1.258862                | 2.394011  | 0.000158  |
| 8             | 16            | 0           | -0.000094               | 3.455474  | 0.000214  |
| 9             | 7             | 0           | -1.259003               | 2.393952  | 0.000117  |
| 10            | 6             | 0           | -2.882413               | -0.091556 | 0.000751  |
| 11            | 9             | 0           | -1.305205               | -2.414515 | 0.000620  |
| 12            | 9             | 0           | 1.305288                | -2.414455 | -0.001089 |
| 13            | 6             | 0           | 2.882389                | -0.091424 | -0.000902 |
| 14            | 6             | 0           | -4.101325               | -0.107294 | 0.001084  |
| 15            | 6             | 0           | 4.101301                | -0.107137 | -0.001253 |
| 16            | 6             | 0           | -5.519008               | -0.122488 | 0.001336  |
| 17            | 6             | 0           | 5.518985                | -0.122364 | -0.001531 |
| 18            | 6             | 0           | -6.234311               | -1.339209 | 0.031568  |
| 19            | 6             | 0           | -7.620075               | -1.352906 | 0.027299  |
| 20            | 6             | 0           | -8.353915               | -0.148881 | 0.001419  |
| 21            | 6             | 0           | -7.642619               | 1.068637  | -0.024420 |
| 22            | 6             | 0           | -6.256955               | 1.080731  | -0.028762 |
| 23            | 6             | 0           | 6.256964                | 1.080828  | 0.028786  |
| 24            | 6             | 0           | 7.642628                | 1.068707  | 0.024423  |
| 25            | 6             | 0           | 8.353904                | -0.148823 | -0.001661 |
| 26            | 6             | 0           | 7.620024                | -1.352825 | -0.027787 |

|    |   |   |            |           |           |
|----|---|---|------------|-----------|-----------|
| 27 | 6 | 0 | 6.234263   | -1.339095 | -0.032024 |
| 28 | 7 | 0 | -9.760590  | -0.161773 | 0.001253  |
| 29 | 6 | 0 | -10.497757 | 0.862141  | -0.666364 |
| 30 | 6 | 0 | -10.479390 | -1.198344 | 0.669410  |
| 31 | 7 | 0 | 9.760560   | -0.161721 | -0.001451 |
| 32 | 6 | 0 | 10.479495  | -1.198387 | -0.669285 |
| 33 | 6 | 0 | 10.497656  | 0.862243  | 0.666240  |
| 34 | 6 | 0 | -11.549048 | -1.840024 | 0.027635  |
| 35 | 6 | 0 | -12.263988 | -2.838518 | 0.687686  |
| 36 | 6 | 0 | -11.914452 | -3.220448 | 1.985000  |
| 37 | 6 | 0 | -10.845982 | -2.585828 | 2.623165  |
| 38 | 6 | 0 | -10.136615 | -1.574421 | 1.977129  |
| 39 | 6 | 0 | -11.578808 | 1.484299  | -0.024459 |
| 40 | 6 | 0 | -12.310956 | 2.470737  | -0.683793 |
| 41 | 6 | 0 | -11.967725 | 2.860010  | -1.980603 |
| 42 | 6 | 0 | -10.888062 | 2.244784  | -2.618952 |
| 43 | 6 | 0 | -10.161260 | 1.245392  | -1.973636 |
| 44 | 6 | 0 | 11.549448  | -1.839512 | -0.027441 |
| 45 | 6 | 0 | 12.264540  | -2.838087 | -0.687205 |
| 46 | 6 | 0 | 11.914882  | -3.220663 | -1.984292 |
| 47 | 6 | 0 | 10.846123  | -2.586598 | -2.622527 |
| 48 | 6 | 0 | 10.136595  | -1.575115 | -1.976789 |
| 49 | 6 | 0 | 11.578116  | 1.485089  | 0.024028  |
| 50 | 6 | 0 | 12.310197  | 2.471555  | 0.683397  |
| 51 | 6 | 0 | 11.967456  | 2.860134  | 1.980546  |
| 52 | 6 | 0 | 10.888373  | 2.244211  | 2.619204  |
| 53 | 6 | 0 | 10.161651  | 1.244790  | 1.973834  |
| 54 | 1 | 0 | -5.688175  | -2.276772 | 0.043702  |
| 55 | 1 | 0 | -8.146098  | -2.300453 | 0.036568  |

|    |   |   |            |           |           |
|----|---|---|------------|-----------|-----------|
| 56 | 1 | 0 | -8.186221  | 2.006204  | -0.033833 |
| 57 | 1 | 0 | -5.727750  | 2.027891  | -0.040881 |
| 58 | 1 | 0 | 5.727785   | 2.028000  | 0.041097  |
| 59 | 1 | 0 | 8.186232   | 2.006271  | 0.033979  |
| 60 | 1 | 0 | 8.146033   | -2.300375 | -0.037306 |
| 61 | 1 | 0 | 5.688109   | -2.276645 | -0.044346 |
| 62 | 1 | 0 | -11.814336 | -1.553029 | -0.984502 |
| 63 | 1 | 0 | -13.089727 | -3.327567 | 0.179365  |
| 64 | 1 | 0 | -12.469338 | -4.002611 | 2.493618  |
| 65 | 1 | 0 | -10.570515 | -2.867050 | 3.635287  |
| 66 | 1 | 0 | -9.317718  | -1.071813 | 2.481105  |
| 67 | 1 | 0 | -11.839249 | 1.191867  | 0.987380  |
| 68 | 1 | 0 | -13.145308 | 2.944690  | -0.175239 |
| 69 | 1 | 0 | -12.536007 | 3.632854  | -2.488672 |
| 70 | 1 | 0 | -10.617183 | 2.531778  | -3.630695 |
| 71 | 1 | 0 | -9.333417  | 0.757885  | -2.477821 |
| 72 | 1 | 0 | 11.814848  | -1.552039 | 0.984530  |
| 73 | 1 | 0 | 13.090507  | -3.326689 | -0.178822 |
| 74 | 1 | 0 | 12.469891  | -4.002888 | -2.492682 |
| 75 | 1 | 0 | 10.570550  | -2.868310 | -3.634484 |
| 76 | 1 | 0 | 9.317487   | -1.072939 | -2.480850 |
| 77 | 1 | 0 | 11.838153  | 1.193148  | -0.988059 |
| 78 | 1 | 0 | 13.144099  | 2.946068  | 0.174630  |
| 79 | 1 | 0 | 12.535681  | 3.632999  | 2.488647  |
| 80 | 1 | 0 | 10.617899  | 2.530683  | 3.631203  |
| 81 | 1 | 0 | 9.334244   | 0.756730  | 2.478203  |

**Table S19.** Computational result of optimized structure of **3I**.

| Center number | Atomic number | Atomic type | Coordinates (Angstroms) |           |           |
|---------------|---------------|-------------|-------------------------|-----------|-----------|
|               |               |             | X                       | Y         | Z         |
| 1             | 6             | 0           | 0.707483                | 1.153690  | 0.001480  |
| 2             | 6             | 0           | -0.707552               | 1.153661  | -0.002076 |
| 3             | 6             | 0           | -1.475326               | 0.000076  | -0.004724 |
| 4             | 6             | 0           | -0.725654               | -1.232669 | -0.002785 |
| 5             | 6             | 0           | 0.725680                | -1.232640 | 0.002468  |
| 6             | 6             | 0           | 1.475301                | 0.000134  | 0.004273  |
| 7             | 7             | 0           | -1.259004               | -2.454339 | -0.004450 |
| 8             | 16            | 0           | 0.000058                | -3.516196 | -0.000021 |
| 9             | 7             | 0           | 1.259078                | -2.454289 | 0.004291  |
| 10            | 6             | 0           | 2.882886                | 0.031928  | 0.007276  |
| 11            | 9             | 0           | 1.305205                | 2.354394  | 0.002422  |
| 12            | 9             | 0           | -1.305321               | 2.354342  | -0.003120 |
| 13            | 6             | 0           | -2.882911               | 0.031810  | -0.007710 |
| 14            | 6             | 0           | 4.102339                | 0.051501  | 0.009461  |
| 15            | 6             | 0           | -4.102365               | 0.051363  | -0.009795 |
| 16            | 6             | 0           | 5.518833                | 0.073823  | 0.010957  |
| 17            | 6             | 0           | -5.518855               | 0.073733  | -0.011199 |
| 18            | 6             | 0           | 6.230112                | 1.290292  | -0.082137 |
| 19            | 6             | 0           | 7.614847                | 1.312947  | -0.085981 |
| 20            | 6             | 0           | 8.360916                | 0.116769  | 0.011161  |
| 21            | 6             | 0           | 7.651280                | -1.101373 | 0.108956  |
| 22            | 6             | 0           | 6.266558                | -1.120610 | 0.104813  |
| 23            | 6             | 0           | -6.266627               | -1.120677 | -0.104989 |
| 24            | 6             | 0           | -7.651350               | -1.101397 | -0.109018 |
| 25            | 6             | 0           | -8.360940               | 0.116766  | -0.011169 |

|    |   |   |            |           |           |
|----|---|---|------------|-----------|-----------|
| 26 | 6 | 0 | -7.614824  | 1.312923  | 0.085895  |
| 27 | 6 | 0 | -6.230092  | 1.290225  | 0.081938  |
| 28 | 7 | 0 | 9.760222   | 0.137771  | 0.010415  |
| 29 | 6 | 0 | 10.517850  | -0.999989 | -0.411446 |
| 30 | 6 | 0 | 10.483337  | 1.299881  | 0.426741  |
| 31 | 7 | 0 | -9.760244  | 0.137808  | -0.010252 |
| 32 | 6 | 0 | -10.483405 | 1.299891  | -0.426553 |
| 33 | 6 | 0 | -10.517820 | -0.999996 | 0.411602  |
| 34 | 6 | 0 | 11.484156  | 1.841758  | -0.395713 |
| 35 | 6 | 0 | 12.210227  | 2.951996  | 0.012641  |
| 36 | 6 | 0 | 11.942253  | 3.560365  | 1.249131  |
| 37 | 6 | 0 | 10.942367  | 3.030216  | 2.074294  |
| 38 | 6 | 0 | 10.231282  | 1.900595  | 1.664258  |
| 39 | 6 | 0 | 11.542895  | -1.507728 | 0.402924  |
| 40 | 6 | 0 | 12.302651  | -2.593053 | -0.011273 |
| 41 | 6 | 0 | 12.045410  | -3.210466 | -1.245545 |
| 42 | 6 | 0 | 11.021696  | -2.714374 | -2.062579 |
| 43 | 6 | 0 | 10.276290  | -1.609255 | -1.646895 |
| 44 | 6 | 0 | -11.484417 | 1.841556  | 0.395807  |
| 45 | 6 | 0 | -12.210534 | 2.951775  | -0.012517 |
| 46 | 6 | 0 | -11.942418 | 3.560347  | -1.248876 |
| 47 | 6 | 0 | -10.942345 | 3.030408  | -2.073944 |
| 48 | 6 | 0 | -10.231215 | 1.900801  | -1.663948 |
| 49 | 6 | 0 | -11.542693 | -1.507929 | -0.402860 |
| 50 | 6 | 0 | -12.302372 | -2.593308 | 0.011339  |
| 51 | 6 | 0 | -12.045216 | -3.210572 | 1.245703  |
| 52 | 6 | 0 | -11.021674 | -2.714282 | 2.062832  |
| 53 | 6 | 0 | -10.276347 | -1.609113 | 1.647139  |
| 54 | 8 | 0 | 12.840383  | -4.275147 | -1.555196 |

|    |   |   |            |           |           |
|----|---|---|------------|-----------|-----------|
| 55 | 6 | 0 | 12.622629  | -4.939578 | -2.796613 |
| 56 | 8 | 0 | 12.703581  | 4.651097  | 1.552405  |
| 57 | 6 | 0 | 12.474092  | 5.308016  | 2.795715  |
| 58 | 8 | 0 | -12.703802 | 4.651049  | -1.552123 |
| 59 | 6 | 0 | -12.474178 | 5.308151  | -2.795310 |
| 60 | 8 | 0 | -12.840100 | -4.275316 | 1.555352  |
| 61 | 6 | 0 | -12.622417 | -4.939601 | 2.796861  |
| 62 | 1 | 0 | 5.679647   | 2.221823  | -0.166234 |
| 63 | 1 | 0 | 8.132113   | 2.260912  | -0.173255 |
| 64 | 1 | 0 | 8.197073   | -2.033227 | 0.196066  |
| 65 | 1 | 0 | 5.743913   | -2.067992 | 0.188653  |
| 66 | 1 | 0 | -5.744019  | -2.068076 | -0.188863 |
| 67 | 1 | 0 | -8.197176  | -2.033236 | -0.196080 |
| 68 | 1 | 0 | -8.132063  | 2.260901  | 0.173184  |
| 69 | 1 | 0 | -5.679591  | 2.221740  | 0.165979  |
| 70 | 1 | 0 | 11.691686  | 1.383551  | -1.357212 |
| 71 | 1 | 0 | 12.985257  | 3.373809  | -0.618883 |
| 72 | 1 | 0 | 10.718616  | 3.472655  | 3.037282  |
| 73 | 1 | 0 | 9.468479   | 1.485488  | 2.315099  |
| 74 | 1 | 0 | 11.742686  | -1.042531 | 1.362705  |
| 75 | 1 | 0 | 13.096464  | -2.988348 | 0.614057  |
| 76 | 1 | 0 | 10.805187  | -3.164079 | -3.023849 |
| 77 | 1 | 0 | 9.494909   | -1.220315 | -2.291798 |
| 78 | 1 | 0 | -11.692062 | 1.383203  | 1.357211  |
| 79 | 1 | 0 | -12.985713 | 3.373420  | 0.618938  |
| 80 | 1 | 0 | -10.718478 | 3.472993  | -3.036838 |
| 81 | 1 | 0 | -9.468273  | 1.485862  | -2.314732 |
| 82 | 1 | 0 | -11.742409 | -1.042842 | -1.362710 |
| 83 | 1 | 0 | -13.096055 | -2.988761 | -0.614056 |

|    |   |   |            |           |           |
|----|---|---|------------|-----------|-----------|
| 84 | 1 | 0 | -10.805240 | -3.163870 | 3.024173  |
| 85 | 1 | 0 | -9.495093  | -1.220014 | 2.292101  |
| 86 | 1 | 0 | 13.352357  | -5.748769 | -2.835742 |
| 87 | 1 | 0 | 11.611895  | -5.360256 | -2.855048 |
| 88 | 1 | 0 | 12.783315  | -4.266105 | -3.646649 |
| 89 | 1 | 0 | 13.176549  | 6.141246  | 2.828852  |
| 90 | 1 | 0 | 11.450318  | 5.694511  | 2.862727  |
| 91 | 1 | 0 | 12.664409  | 4.640379  | 3.644232  |
| 92 | 1 | 0 | -13.176729 | 6.141301  | -2.828463 |
| 93 | 1 | 0 | -11.450439 | 5.694779  | -2.862096 |
| 94 | 1 | 0 | -12.664266 | 4.640601  | -3.643947 |
| 95 | 1 | 0 | -13.352053 | -5.748873 | 2.835980  |
| 96 | 1 | 0 | -11.611639 | -5.360150 | 2.855459  |
| 97 | 1 | 0 | -12.783287 | -4.266062 | 3.646811  |

**Table S20.** Computational result of optimized structure of **3m**.

| Center number | Atomic number | Atomic type | Coordinates (Angstroms) |           |           |
|---------------|---------------|-------------|-------------------------|-----------|-----------|
|               |               |             | X                       | Y         | Z         |
| 1             | 6             | 0           | -0.707305               | -1.256044 | -0.000586 |
| 2             | 6             | 0           | 0.707279                | -1.256049 | -0.000532 |
| 3             | 6             | 0           | 1.476488                | -0.103118 | -0.000458 |
| 4             | 6             | 0           | 0.725983                | 1.129244  | -0.000450 |
| 5             | 6             | 0           | -0.725977               | 1.129250  | -0.000525 |
| 6             | 6             | 0           | -1.476508               | -0.103108 | -0.000553 |
| 7             | 7             | 0           | 1.259163                | 2.351066  | -0.000401 |
| 8             | 16            | 0           | 0.000009                | 3.413147  | -0.000503 |
| 9             | 7             | 0           | -1.259149               | 2.351073  | -0.000532 |
| 10            | 6             | 0           | -2.883796               | -0.136912 | -0.000593 |
| 11            | 9             | 0           | -1.305042               | -2.457590 | -0.000673 |
| 12            | 9             | 0           | 1.305005                | -2.457600 | -0.000563 |
| 13            | 6             | 0           | 2.883792                | -0.136963 | -0.000386 |
| 14            | 6             | 0           | -4.103566               | -0.165546 | -0.000459 |
| 15            | 6             | 0           | 4.103559                | -0.165609 | -0.000390 |
| 16            | 6             | 0           | -5.518960               | -0.204704 | -0.000346 |
| 17            | 6             | 0           | 5.518973                | -0.204725 | -0.000368 |
| 18            | 6             | 0           | -6.216099               | -1.432942 | -0.000074 |
| 19            | 6             | 0           | -7.599258               | -1.478375 | 0.000141  |
| 20            | 6             | 0           | -8.372977               | -0.287230 | -0.000056 |
| 21            | 6             | 0           | -7.669387               | 0.946671  | -0.000138 |
| 22            | 6             | 0           | -6.285741               | 0.981217  | -0.000343 |
| 23            | 6             | 0           | 6.285727                | 0.981203  | 0.000415  |
| 24            | 6             | 0           | 7.669382                | 0.946677  | 0.000466  |
| 25            | 6             | 0           | 8.372984                | -0.287208 | -0.000502 |
| 26            | 6             | 0           | 7.599286                | -1.478362 | -0.000951 |



|    |   |   |            |           |           |
|----|---|---|------------|-----------|-----------|
| 27 | 6 | 0 | 6.216122   | -1.432953 | -0.000980 |
| 28 | 7 | 0 | -9.745429  | -0.327510 | -0.000159 |
| 29 | 6 | 0 | -10.515684 | 0.908452  | 0.001598  |
| 30 | 6 | 0 | -10.441162 | -1.606835 | 0.002035  |
| 31 | 7 | 0 | 9.745447   | -0.327491 | -0.001140 |
| 32 | 6 | 0 | 10.441126  | -1.606833 | 0.001790  |
| 33 | 6 | 0 | 10.515712  | 0.908448  | 0.002811  |
| 34 | 1 | 0 | -5.653105  | -2.361031 | 0.000046  |
| 35 | 1 | 0 | -8.086436  | -2.445026 | 0.000471  |
| 36 | 1 | 0 | -8.211995  | 1.883384  | 0.000014  |
| 37 | 1 | 0 | -5.776859  | 1.939988  | -0.000444 |
| 38 | 1 | 0 | 5.776847   | 1.939974  | 0.001107  |
| 39 | 1 | 0 | 8.211964   | 1.883403  | 0.001295  |
| 40 | 1 | 0 | 8.086485   | -2.445005 | -0.001267 |
| 41 | 1 | 0 | 5.653155   | -2.361057 | -0.001408 |
| 42 | 1 | 0 | -10.307331 | 1.516723  | 0.891063  |
| 43 | 1 | 0 | -10.305952 | 1.519653  | -0.885457 |
| 44 | 1 | 0 | -11.578040 | 0.667282  | 0.000261  |
| 45 | 1 | 0 | -10.195870 | -2.205031 | -0.884838 |
| 46 | 1 | 0 | -10.197042 | -2.201772 | 0.891490  |
| 47 | 1 | 0 | -11.515866 | -1.428890 | 0.000891  |
| 48 | 1 | 0 | 10.195361  | -2.205616 | -0.884538 |
| 49 | 1 | 0 | 11.515839  | -1.428940 | -0.000095 |
| 50 | 1 | 0 | 10.197406  | -2.201163 | 0.891782  |
| 51 | 1 | 0 | 10.307948  | 1.514955  | 0.893643  |
| 52 | 1 | 0 | 11.578070  | 0.667273  | 0.000257  |
| 53 | 1 | 0 | 10.305413  | 1.521405  | -0.882871 |

**Table S21.** Computational result of optimized structure of **3n**.

| Center number | Atomic number | Atomic type | Coordinates (Angstroms) |           |           |
|---------------|---------------|-------------|-------------------------|-----------|-----------|
|               |               |             | X                       | Y         | Z         |
| 1             | 6             | 0           | 0.706411                | -1.526621 | 0.005076  |
| 2             | 6             | 0           | -0.706395               | -1.526634 | 0.005128  |
| 3             | 6             | 0           | -1.465071               | -0.359132 | 0.004111  |
| 4             | 6             | 0           | -0.725523               | 0.878784  | 0.003335  |
| 5             | 6             | 0           | 0.725502                | 0.878796  | 0.003302  |
| 6             | 6             | 0           | 1.465067                | -0.359107 | 0.004008  |
| 7             | 7             | 0           | -1.259474               | 2.103353  | 0.002524  |
| 8             | 16            | 0           | -0.000030               | 3.163413  | 0.001763  |
| 9             | 7             | 0           | 1.259431                | 2.103376  | 0.002445  |
| 10            | 6             | 0           | 2.877383                | -0.366077 | 0.003135  |
| 11            | 6             | 0           | -2.877383               | -0.366120 | 0.003455  |
| 12            | 6             | 0           | 4.097823                | -0.380380 | 0.001712  |
| 13            | 6             | 0           | -4.097825               | -0.380435 | 0.002475  |
| 14            | 6             | 0           | 5.515113                | -0.393299 | -0.000729 |
| 15            | 6             | 0           | -5.515112               | -0.393349 | 0.000805  |
| 16            | 6             | 0           | 6.238456                | -1.605871 | -0.001538 |
| 17            | 6             | 0           | 7.622945                | -1.623074 | -0.004513 |
| 18            | 6             | 0           | 8.371897                | -0.416825 | -0.008247 |
| 19            | 6             | 0           | 7.642835                | 0.801597  | -0.004851 |
| 20            | 6             | 0           | 6.258306                | 0.807348  | -0.001894 |
| 21            | 6             | 0           | -6.258285               | 0.807319  | -0.002178 |
| 22            | 6             | 0           | -7.642810               | 0.801593  | -0.004253 |
| 23            | 6             | 0           | -8.371885               | -0.416836 | -0.003850 |
| 24            | 6             | 0           | -7.622960               | -1.623104 | 0.000030  |
| 25            | 6             | 0           | -6.238470               | -1.605913 | 0.002051  |
| 26            | 7             | 0           | 9.746026                | -0.428287 | -0.015766 |

|    |   |   |            |           |           |
|----|---|---|------------|-----------|-----------|
| 27 | 6 | 0 | 10.489365  | 0.823452  | 0.003557  |
| 28 | 6 | 0 | 10.468091  | -1.692310 | 0.003708  |
| 29 | 7 | 0 | -9.745982  | -0.428274 | -0.007364 |
| 30 | 6 | 0 | -10.468105 | -1.692378 | -0.000123 |
| 31 | 6 | 0 | -10.489312 | 0.823597  | -0.004078 |
| 32 | 1 | 0 | 1.223323   | -2.480361 | 0.005676  |
| 33 | 1 | 0 | -1.223290  | -2.480383 | 0.005776  |
| 34 | 1 | 0 | 5.695534   | -2.545985 | 0.000802  |
| 35 | 1 | 0 | 8.130006   | -2.579554 | -0.003782 |
| 36 | 1 | 0 | 8.165664   | 1.749558  | -0.004368 |
| 37 | 1 | 0 | 5.729872   | 1.755520  | 0.000162  |
| 38 | 1 | 0 | -5.729821  | 1.755476  | -0.002736 |
| 39 | 1 | 0 | -8.165652  | 1.749547  | -0.006201 |
| 40 | 1 | 0 | -8.130059  | -2.579566 | 0.001516  |
| 41 | 1 | 0 | -5.695557  | -2.546031 | 0.004828  |
| 42 | 1 | 0 | 10.258043  | 1.445925  | -0.870047 |
| 43 | 1 | 0 | 10.277122  | 1.412017  | 0.905783  |
| 44 | 1 | 0 | 11.556669  | 0.605490  | -0.013148 |
| 45 | 1 | 0 | 10.245718  | -2.277360 | 0.905831  |
| 46 | 1 | 0 | 10.226623  | -2.310868 | -0.869983 |
| 47 | 1 | 0 | 11.538905  | -1.492410 | -0.012626 |
| 48 | 1 | 0 | -10.240275 | -2.287667 | 0.893657  |
| 49 | 1 | 0 | -11.538971 | -1.492230 | -0.006894 |
| 50 | 1 | 0 | -10.232077 | -2.300993 | -0.882499 |
| 51 | 1 | 0 | -10.264083 | 1.432919  | -0.888744 |
| 52 | 1 | 0 | -11.556682 | 0.605414  | -0.009381 |
| 53 | 1 | 0 | -10.270893 | 1.425620  | 0.887481  |

**Table S22.** Computational result of optimized structure of **3o**.

| Center number | Atomic number | Atomic type | Coordinates (Angstroms) |           |           |
|---------------|---------------|-------------|-------------------------|-----------|-----------|
|               |               |             | X                       | Y         | Z         |
| 1             | 6             | 0           | -0.709626               | -1.450745 | -0.013057 |
| 2             | 6             | 0           | 0.709669                | -1.450731 | 0.012576  |
| 3             | 6             | 0           | 1.480844                | -0.301677 | 0.016289  |
| 4             | 6             | 0           | 0.730647                | 0.928833  | 0.007743  |
| 5             | 6             | 0           | -0.730664               | 0.928818  | -0.007914 |
| 6             | 6             | 0           | -1.480829               | -0.301709 | -0.016599 |
| 7             | 7             | 0           | 1.255747                | 2.160579  | 0.003418  |
| 8             | 16            | 0           | -0.000033               | 3.220301  | 0.000038  |
| 9             | 7             | 0           | -1.255791               | 2.160552  | -0.003449 |
| 10            | 6             | 0           | -2.956261               | -0.351886 | -0.010492 |
| 11            | 6             | 0           | 2.956274                | -0.351809 | 0.010246  |
| 12            | 6             | 0           | -3.635049               | -1.384196 | 0.664190  |
| 13            | 6             | 0           | -5.019288               | -1.487475 | 0.660179  |
| 14            | 6             | 0           | -5.819531               | -0.552804 | -0.041258 |
| 15            | 6             | 0           | -5.140850               | 0.497333  | -0.706027 |
| 16            | 6             | 0           | -3.755324               | 0.588386  | -0.687388 |
| 17            | 6             | 0           | 3.755265                | 0.588387  | 0.687343  |
| 18            | 6             | 0           | 5.140786                | 0.497354  | 0.706089  |
| 19            | 6             | 0           | 5.819539                | -0.552666 | 0.041192  |
| 20            | 6             | 0           | 5.019373                | -1.487272 | -0.660427 |
| 21            | 6             | 0           | 3.635133                | -1.384015 | -0.664524 |
| 22            | 7             | 0           | -7.197296               | -0.662497 | -0.078118 |
| 23            | 6             | 0           | -7.991868               | 0.424962  | -0.630316 |
| 24            | 6             | 0           | -7.862843               | -1.652768 | 0.755174  |
| 25            | 7             | 0           | 7.197276                | -0.662224 | 0.078105  |

|    |   |   |           |           |           |
|----|---|---|-----------|-----------|-----------|
| 26 | 6 | 0 | 7.862978  | -1.653369 | -0.753990 |
| 27 | 6 | 0 | 7.991751  | 0.425278  | 0.630350  |
| 28 | 1 | 0 | -1.209168 | -2.413991 | -0.041455 |
| 29 | 1 | 0 | 1.209234  | -2.413969 | 0.040856  |
| 30 | 1 | 0 | -3.066577 | -2.111141 | 1.237008  |
| 31 | 1 | 0 | -5.479460 | -2.292477 | 1.219406  |
| 32 | 1 | 0 | -5.698626 | 1.250213  | -1.248792 |
| 33 | 1 | 0 | -3.282481 | 1.407376  | -1.216062 |
| 34 | 1 | 0 | 3.282358  | 1.407265  | 1.216134  |
| 35 | 1 | 0 | 5.698523  | 1.250097  | 1.249086  |
| 36 | 1 | 0 | 5.479614  | -2.292159 | -1.219767 |
| 37 | 1 | 0 | 3.066715  | -2.110886 | -1.237491 |
| 38 | 1 | 0 | -7.858817 | 1.368574  | -0.080834 |
| 39 | 1 | 0 | -7.738320 | 0.606608  | -1.680654 |
| 40 | 1 | 0 | -9.046452 | 0.151882  | -0.588680 |
| 41 | 1 | 0 | -7.515015 | -2.664245 | 0.518386  |
| 42 | 1 | 0 | -7.702104 | -1.481490 | 1.830086  |
| 43 | 1 | 0 | -8.935113 | -1.619299 | 0.561151  |
| 44 | 1 | 0 | 7.514608  | -2.664528 | -0.516639 |
| 45 | 1 | 0 | 7.702990  | -1.482878 | -1.829141 |
| 46 | 1 | 0 | 8.935139  | -1.620157 | -0.559322 |
| 47 | 1 | 0 | 7.857797  | 1.369078  | 0.081441  |
| 48 | 1 | 0 | 7.738929  | 0.606312  | 1.680991  |
| 49 | 1 | 0 | 9.046435  | 0.152762  | 0.587717  |

**Table S23.** Computational result of optimized structure of **3p**.

| Center number | Atomic number | Atomic type | Coordinates (Angstroms) |           |           |
|---------------|---------------|-------------|-------------------------|-----------|-----------|
|               |               |             | X                       | Y         | Z         |
| 1             | 6             | 0           | 3.022235                | -1.485129 | 0.000045  |
| 2             | 6             | 0           | 1.599910                | -1.444524 | 0.000042  |
| 3             | 6             | 0           | 0.870686                | -0.270125 | -0.000001 |
| 4             | 6             | 0           | 1.656516                | 0.941067  | -0.000015 |
| 5             | 6             | 0           | 3.109507                | 0.903149  | 0.000006  |
| 6             | 6             | 0           | 3.789543                | -0.349250 | 0.000023  |
| 7             | 7             | 0           | 1.159494                | 2.177261  | -0.000073 |
| 8             | 16            | 0           | 2.445643                | 3.203023  | -0.000075 |
| 9             | 7             | 0           | 3.676353                | 2.110506  | -0.000006 |
| 10            | 35            | 0           | 5.671025                | -0.446818 | 0.000036  |
| 11            | 9             | 0           | 3.583887                | -2.698304 | 0.000064  |
| 12            | 9             | 0           | 0.973179                | -2.628928 | 0.000053  |
| 13            | 6             | 0           | -0.537243               | -0.252913 | 0.000009  |
| 14            | 6             | 0           | -1.756523               | -0.218999 | -0.000091 |
| 15            | 6             | 0           | -3.170927               | -0.171471 | -0.000099 |
| 16            | 6             | 0           | -3.857760               | 1.062828  | -0.000020 |
| 17            | 6             | 0           | -5.239955               | 1.118943  | 0.000000  |
| 18            | 6             | 0           | -6.022934               | -0.066758 | -0.000065 |
| 19            | 6             | 0           | -5.329095               | -1.306689 | -0.000190 |
| 20            | 6             | 0           | -3.946181               | -1.351967 | -0.000196 |
| 21            | 7             | 0           | -7.393910               | -0.015668 | -0.000063 |
| 22            | 6             | 0           | -8.174527               | -1.245599 | 0.000000  |
| 23            | 6             | 0           | -8.080004               | 1.269349  | 0.000366  |
| 24            | 1             | 0           | -3.286690               | 1.985863  | 0.000022  |
| 25            | 1             | 0           | -5.719771               | 2.089179  | 0.000052  |

|    |   |   |           |           |           |
|----|---|---|-----------|-----------|-----------|
| 26 | 1 | 0 | -5.879120 | -2.238980 | -0.000285 |
| 27 | 1 | 0 | -3.445023 | -2.314817 | -0.000280 |
| 28 | 1 | 0 | -7.970090 | -1.856588 | 0.888292  |
| 29 | 1 | 0 | -9.234757 | -0.995588 | 0.000228  |
| 30 | 1 | 0 | -7.970415 | -1.856437 | -0.888466 |
| 31 | 1 | 0 | -7.830730 | 1.863695  | -0.887850 |
| 32 | 1 | 0 | -9.155941 | 1.099497  | 0.000603  |
| 33 | 1 | 0 | -7.830264 | 1.863366  | 0.888665  |

## 14. Supplementary material reference

- [1] S.-H. Chen, S.-H. Luo, L.-J. Xing, K. Jiang, Y.-P. Huo, Q. Chen and Z.-Y. Wang, Rational design and facile synthesis of dual-state emission fluorophores: expanding functionality for the sensitive detection of nitroaromatic compounds, *Chem. Eur. J.*, 2022, **28**, e202103478.
- [2] A. Casey, Y. Han, E. Gann, J. P. Green, C. R. McNeill, T. D. Anthopoulos and M. Heeney, Vinylene-linked oligothiophene-difluorobenzothiadiazole copolymer for transistor applications, *ACS Appl. Mater. Interfaces*, 2016, **8**, 31154.
- [3] S. Hamer, F. Rohricht, M. Jakoby, I. A. Howard, X. H. Zhang, C. Nather and R. Herges, Synthesis of dipolar molecular rotors as linkers for metal-organic frameworks, *Beilstein J. Org. Chem.*, 2019, **15**, 1331.
- [4] S. H. Chen, Y. J. Li, C. Liu, W. L. Yang and Y. L. Li, Strong charge-transfer chromophores from [2+2] cycloadditions of TCNE and TCNQ to peripheral donor-substituted alkynes, *Eur. J. Org. Chem.*, 2011, **2011**, 6445.
- [5] J. Wang, H. Y. Cui, H. P. Ruan, Y. Zhao, Y. Zhao, L. Zhang and X. P. Wang, The lewis acid induced formation of a stable diradical with an intramolecular ion pairing state, *J. Am. Chem. Soc.* **2022**, *144*, 7978.
- [6] J. X. Zhang, T. C. Parker, W. Chen, L. Williams, V. N. Khrustalev, E. V. Jucov, S. Barlow, T. V. Timofeeva and S. R. Marder, C-H-activated direct arylation of strong benzothiadiazole and quinoxaline-based electron acceptors, *J. Org. Chem.*, 2016, **81**, 360.
- [7] I. S. Park, S. Y. Lee, C. Adachi and T. Yasuda, Full-color delayed fluorescence materials based on wedge-shaped phthalonitriles and dicyanopyrazines: systematic design, tunable photophysical properties, and OLED performance, *Adv. Funct. Mater.*, 2016, **26**, 1813.
- [8] H. T. Ding, Y. T. Sun, M. Tang, J. Y. Wen, S. W. Yue, Y. Peng, F. Li, L. Y. Zheng, S. N. Wang, Y. G. Shi and Q. Cao, Time-dependent photo-activated aminoborane room-temperature phosphorescence materials with unprecedented properties: simple, versatile, multicolor-tunable, water resistance, optical information writing/erasing, and multilevel data encryption, *Chem. Sci.*, 2023, **14**, 4633.
- [9] C. C. Liu, H. T. Bai, B. Z. He, X. W. He, J. Y. Zhang, C. Chen, Y. P. Qiu, R. Hu, F. X. Zhao, Y. X.



Zhang, W. He, J. H. C. Chau, S. J. Chen, J. W. Y. Lam and B. Z. Tang, Functionalization of silk by AIEgens through facile bioconjugation: Full-color fluorescence and long-term bioimaging, *Angew. Chem. Int. Ed.*, 2021, **60**, 12424.

[10] L. Wang, Y. Y. Ma, J. L. Yin, L. L. Zhu, S. F. Li and W. Y. Lin, A deep-red emission fluorescent probe for visualization of fluoride anion accumulation in a murine model of acute fluoride toxicity and the roots of *Arabidopsis thaliana*, *Sens. Actuators B Chem.*, 2022, **358**, 131508.
